# Supplementary material for: RNA sequencing-based profiling of differentially expressed microRNAs in endothelial cells from offspring of hypertensive pregnancies: a preliminary study
Source: Front Mol Biosci. 2025 Jul 21;12:1520101. doi: 10.3389/fmolb.2025.1520101 (PMC12391922; doi:10.3389/fmolb.2025.1520101)
Supplement: Supplementary file 1 [file DataSheet6.xls]

## Sheet: ClueGO Results
ID	Term	Ontology Source	Term PValue	Term PValue Corrected with Benjamini-Hochberg	Group PValue	Group PValue Corrected with Benjamini-Hochberg	GOLevels	GOGroups	% Associated Genes	Nr. Genes	Associated Genes Found
KEGG:04350	TGF-beta signaling pathway	KEGG_25.05.2022	2.91278e-06	4.36918e-06	1.18876e-08	2.77376e-08	[-1]	Group0	4.25532	4	[MAPK1, SKP1, SMAD3, SMAD4]
KEGG:04520	Adherens junction	KEGG_25.05.2022	1.10166e-08	3.59238e-08	1.18876e-08	2.77376e-08	[-1]	Group0	7.04225	5	[ACTB, MAPK1, SMAD3, SMAD4, VCL]
KEGG:04710	Circadian rhythm	KEGG_25.05.2022	4.84927e-06	6.7351e-06	2.79078e-06	2.79078e-06	[-1]	Group1	9.67742	3	[BTRC, CREB1, SKP1]
GO:0051438	regulation of ubiquitin-protein transferase activity	GO_BiologicalProcess-EBI-UniProt-GOA-ACAP-ARAP_25.05.2022_00h00	4.39307e-05	4.70686e-05	2.79078e-06	2.79078e-06	[5, 9, 10]	Group1	4.6875	3	[ABL1, BTRC, SKP1]
GO:2000772	regulation of cellular senescence	GO_BiologicalProcess-EBI-UniProt-GOA-ACAP-ARAP_25.05.2022_00h00	2.0868e-05	2.56573e-05	1.05395e-07	1.47552e-07	[4, 5]	Group2	6	3	[ABL1, CDK6, SIRT1]
GO:2000773	negative regulation of cellular senescence	GO_BiologicalProcess-EBI-UniProt-GOA-ACAP-ARAP_25.05.2022_00h00	2.81466e-06	4.30816e-06	1.05395e-07	1.47552e-07	[4, 5, 6]	Group2	11.5385	3	[ABL1, CDK6, SIRT1]
GO:0001954	positive regulation of cell-matrix adhesion	GO_BiologicalProcess-EBI-UniProt-GOA-ACAP-ARAP_25.05.2022_00h00	3.8027e-05	4.19416e-05	1.05395e-07	1.47552e-07	[5, 6, 7]	Group2	4.91803	3	[ABL1, CDK6, SMAD3]
GO:0043535	regulation of blood vessel endothelial cell migration	GO_BiologicalProcess-EBI-UniProt-GOA-ACAP-ARAP_25.05.2022_00h00	3.30259e-06	4.85674e-06	1.05395e-07	1.47552e-07	[5, 6, 7, 8]	Group2	4.12371	4	[ABL1, NOTCH1, PLCG1, SIRT1]
GO:1901532	regulation of hematopoietic progenitor cell differentiation	GO_BiologicalProcess-EBI-UniProt-GOA-ACAP-ARAP_25.05.2022_00h00	1.05924e-05	1.3697e-05	1.05395e-07	1.47552e-07	[4, 5, 6, 7, 8, 9]	Group2	7.5	3	[ABL1, CDK6, NOTCH1]
GO:0043536	positive regulation of blood vessel endothelial cell migration	GO_BiologicalProcess-EBI-UniProt-GOA-ACAP-ARAP_25.05.2022_00h00	3.43967e-05	3.90871e-05	1.05395e-07	1.47552e-07	[6, 7, 8, 9]	Group2	5.08475	3	[ABL1, PLCG1, SIRT1]
KEGG:04110	Cell cycle	KEGG_25.05.2022	3.28778e-09	1.54115e-08	1.21127e-10	4.23944e-10	[-1]	Group3	4.7619	6	[ABL1, CDK1, CDK6, SKP1, SMAD3, SMAD4]
GO:2000772	regulation of cellular senescence	GO_BiologicalProcess-EBI-UniProt-GOA-ACAP-ARAP_25.05.2022_00h00	2.0868e-05	2.56573e-05	1.21127e-10	4.23944e-10	[4, 5]	Group3	6	3	[ABL1, CDK6, SIRT1]
GO:0045668	negative regulation of osteoblast differentiation	GO_BiologicalProcess-EBI-UniProt-GOA-ACAP-ARAP_25.05.2022_00h00	1.84405e-05	2.30506e-05	1.21127e-10	4.23944e-10	[4, 5, 6]	Group3	6.25	3	[CDK6, NOTCH1, SMAD3]
GO:1903053	regulation of extracellular matrix organization	GO_BiologicalProcess-EBI-UniProt-GOA-ACAP-ARAP_25.05.2022_00h00	3.61819e-05	4.05022e-05	1.21127e-10	4.23944e-10	[4, 5, 6]	Group3	5	3	[ABL1, NOTCH1, SMAD3]
GO:2000773	negative regulation of cellular senescence	GO_BiologicalProcess-EBI-UniProt-GOA-ACAP-ARAP_25.05.2022_00h00	2.81466e-06	4.30816e-06	1.21127e-10	4.23944e-10	[4, 5, 6]	Group3	11.5385	3	[ABL1, CDK6, SIRT1]
GO:0001954	positive regulation of cell-matrix adhesion	GO_BiologicalProcess-EBI-UniProt-GOA-ACAP-ARAP_25.05.2022_00h00	3.8027e-05	4.19416e-05	1.21127e-10	4.23944e-10	[5, 6, 7]	Group3	4.91803	3	[ABL1, CDK6, SMAD3]
GO:0090109	regulation of cell-substrate junction assembly	GO_BiologicalProcess-EBI-UniProt-GOA-ACAP-ARAP_25.05.2022_00h00	6.25367e-05	6.425e-05	1.21127e-10	4.23944e-10	[5, 6, 7]	Group3	4.16667	3	[ABL1, SMAD3, VCL]
GO:1901532	regulation of hematopoietic progenitor cell differentiation	GO_BiologicalProcess-EBI-UniProt-GOA-ACAP-ARAP_25.05.2022_00h00	1.05924e-05	1.3697e-05	1.21127e-10	4.23944e-10	[4, 5, 6, 7, 8, 9]	Group3	7.5	3	[ABL1, CDK6, NOTCH1]
GO:0051893	regulation of focal adhesion assembly	GO_BiologicalProcess-EBI-UniProt-GOA-ACAP-ARAP_25.05.2022_00h00	6.25367e-05	6.425e-05	1.21127e-10	4.23944e-10	[6, 7, 8]	Group3	4.16667	3	[ABL1, SMAD3, VCL]
GO:0007492	endoderm development	GO_BiologicalProcess-EBI-UniProt-GOA-ACAP-ARAP_25.05.2022_00h00	2.67261e-06	4.26481e-06	4.31144e-07	5.03001e-07	[4]	Group4	4.34783	4	[MAP2K1, NOTCH1, SMAD3, SMAD4]
GO:0072132	mesenchyme morphogenesis	GO_BiologicalProcess-EBI-UniProt-GOA-ACAP-ARAP_25.05.2022_00h00	3.8027e-05	4.19416e-05	4.31144e-07	5.03001e-07	[4, 5]	Group4	4.91803	3	[NOTCH1, SMAD3, SMAD4]
GO:0001756	somitogenesis	GO_BiologicalProcess-EBI-UniProt-GOA-ACAP-ARAP_25.05.2022_00h00	5.26961e-05	5.56649e-05	4.31144e-07	5.03001e-07	[3, 4, 5, 6, 7]	Group4	4.41176	3	[NOTCH1, SMAD3, SMAD4]
GO:0014741	negative regulation of muscle hypertrophy	GO_BiologicalProcess-EBI-UniProt-GOA-ACAP-ARAP_25.05.2022_00h00	5.34721e-06	7.29165e-06	4.31144e-07	5.03001e-07	[3, 4, 5, 6, 7]	Group4	9.375	3	[NOTCH1, SMAD3, SMAD4]
GO:0045668	negative regulation of osteoblast differentiation	GO_BiologicalProcess-EBI-UniProt-GOA-ACAP-ARAP_25.05.2022_00h00	1.84405e-05	2.30506e-05	4.31144e-07	5.03001e-07	[4, 5, 6]	Group4	6.25	3	[CDK6, NOTCH1, SMAD3]
GO:1903053	regulation of extracellular matrix organization	GO_BiologicalProcess-EBI-UniProt-GOA-ACAP-ARAP_25.05.2022_00h00	3.61819e-05	4.05022e-05	4.31144e-07	5.03001e-07	[4, 5, 6]	Group4	5	3	[ABL1, NOTCH1, SMAD3]
GO:0010611	regulation of cardiac muscle hypertrophy	GO_BiologicalProcess-EBI-UniProt-GOA-ACAP-ARAP_25.05.2022_00h00	3.26703e-05	3.76966e-05	4.31144e-07	5.03001e-07	[4, 5, 6, 7]	Group4	5.17241	3	[NOTCH1, SMAD3, SMAD4]
GO:0010718	positive regulation of epithelial to mesenchymal transition	GO_BiologicalProcess-EBI-UniProt-GOA-ACAP-ARAP_25.05.2022_00h00	2.34971e-05	2.84239e-05	4.31144e-07	5.03001e-07	[3, 4, 5, 6, 7, 8]	Group4	5.76923	3	[NOTCH1, SMAD3, SMAD4]
GO:0014743	regulation of muscle hypertrophy	GO_BiologicalProcess-EBI-UniProt-GOA-ACAP-ARAP_25.05.2022_00h00	3.8027e-05	4.19416e-05	4.31144e-07	5.03001e-07	[5, 6]	Group4	4.91803	3	[NOTCH1, SMAD3, SMAD4]
GO:0001954	positive regulation of cell-matrix adhesion	GO_BiologicalProcess-EBI-UniProt-GOA-ACAP-ARAP_25.05.2022_00h00	3.8027e-05	4.19416e-05	4.31144e-07	5.03001e-07	[5, 6, 7]	Group4	4.91803	3	[ABL1, CDK6, SMAD3]
GO:0010614	negative regulation of cardiac muscle hypertrophy	GO_BiologicalProcess-EBI-UniProt-GOA-ACAP-ARAP_25.05.2022_00h00	4.38303e-06	6.2024e-06	4.31144e-07	5.03001e-07	[4, 5, 6, 7, 8]	Group4	10	3	[NOTCH1, SMAD3, SMAD4]
GO:0090109	regulation of cell-substrate junction assembly	GO_BiologicalProcess-EBI-UniProt-GOA-ACAP-ARAP_25.05.2022_00h00	6.25367e-05	6.425e-05	4.31144e-07	5.03001e-07	[5, 6, 7]	Group4	4.16667	3	[ABL1, SMAD3, VCL]
GO:1901532	regulation of hematopoietic progenitor cell differentiation	GO_BiologicalProcess-EBI-UniProt-GOA-ACAP-ARAP_25.05.2022_00h00	1.05924e-05	1.3697e-05	4.31144e-07	5.03001e-07	[4, 5, 6, 7, 8, 9]	Group4	7.5	3	[ABL1, CDK6, NOTCH1]
GO:0051893	regulation of focal adhesion assembly	GO_BiologicalProcess-EBI-UniProt-GOA-ACAP-ARAP_25.05.2022_00h00	6.25367e-05	6.425e-05	4.31144e-07	5.03001e-07	[6, 7, 8]	Group4	4.16667	3	[ABL1, SMAD3, VCL]
KEGG:04211	Longevity regulating pathway	KEGG_25.05.2022	2.34031e-06	3.81572e-06	3.95717e-08	6.92505e-08	[-1]	Group5	4.49438	4	[CREB1, KRAS, NRAS, SIRT1]
KEGG:04213	Longevity regulating pathway	KEGG_25.05.2022	3.99329e-05	4.34053e-05	3.95717e-08	6.92505e-08	[-1]	Group5	4.83871	3	[KRAS, NRAS, SIRT1]
KEGG:04725	Cholinergic synapse	KEGG_25.05.2022	1.15415e-07	2.54592e-07	3.95717e-08	6.92505e-08	[-1]	Group5	4.42478	5	[CREB1, KRAS, MAP2K1, MAPK1, NRAS]
KEGG:04916	Melanogenesis	KEGG_25.05.2022	6.56648e-08	1.64162e-07	3.95717e-08	6.92505e-08	[-1]	Group5	4.9505	5	[CREB1, KRAS, MAP2K1, MAPK1, NRAS]
KEGG:04935	Growth hormone synthesis, secretion and action	KEGG_25.05.2022	2.32712e-09	1.16356e-08	3.95717e-08	6.92505e-08	[-1]	Group5	5.04202	6	[CREB1, KRAS, MAP2K1, MAPK1, NRAS, PLCG1]
KEGG:05214	Glioma	KEGG_25.05.2022	1.38983e-10	1.30297e-09	3.95717e-08	6.92505e-08	[-1]	Group5	8	6	[CDK6, KRAS, MAP2K1, MAPK1, NRAS, PLCG1]
KEGG:05215	Prostate cancer	KEGG_25.05.2022	5.35723e-08	1.48812e-07	3.95717e-08	6.92505e-08	[-1]	Group5	5.15464	5	[CREB1, KRAS, MAP2K1, MAPK1, NRAS]
KEGG:05218	Melanoma	KEGG_25.05.2022	1.18307e-08	3.69709e-08	3.95717e-08	6.92505e-08	[-1]	Group5	6.94444	5	[CDK6, KRAS, MAP2K1, MAPK1, NRAS]
KEGG:05223	Non-small cell lung cancer	KEGG_25.05.2022	1.08052e-10	1.1577e-09	3.95717e-08	6.92505e-08	[-1]	Group5	8.33333	6	[CDK6, KRAS, MAP2K1, MAPK1, NRAS, PLCG1]
KEGG:05224	Breast cancer	KEGG_25.05.2022	8.32135e-09	3.12051e-08	3.95717e-08	6.92505e-08	[-1]	Group5	4.08163	6	[CDK6, KRAS, MAP2K1, MAPK1, NOTCH1, NRAS]
GO:0048873	homeostasis of number of cells within a tissue	GO_BiologicalProcess-EBI-UniProt-GOA-ACAP-ARAP_25.05.2022_00h00	9.80473e-06	1.2901e-05	3.95717e-08	6.92505e-08	[4, 5, 6]	Group5	7.69231	3	[KRAS, NOTCH1, NRAS]
GO:0030857	negative regulation of epithelial cell differentiation	GO_BiologicalProcess-EBI-UniProt-GOA-ACAP-ARAP_25.05.2022_00h00	2.48896e-05	2.96305e-05	3.95717e-08	6.92505e-08	[4, 5, 6, 7]	Group5	5.66038	3	[KRAS, NOTCH1, NRAS]
GO:0060479	lung cell differentiation	GO_BiologicalProcess-EBI-UniProt-GOA-ACAP-ARAP_25.05.2022_00h00	3.94746e-06	5.69345e-06	3.95717e-08	6.92505e-08	[4, 5, 6, 7]	Group5	10.3448	3	[CREB1, KRAS, NRAS]
GO:0035914	skeletal muscle cell differentiation	GO_BiologicalProcess-EBI-UniProt-GOA-ACAP-ARAP_25.05.2022_00h00	7.06575e-05	7.06575e-05	3.95717e-08	6.92505e-08	[4, 6, 7]	Group5	4	3	[KRAS, NOTCH1, NRAS]
GO:0014009	glial cell proliferation	GO_BiologicalProcess-EBI-UniProt-GOA-ACAP-ARAP_25.05.2022_00h00	3.1002e-05	3.63305e-05	3.95717e-08	6.92505e-08	[3, 6, 7, 8]	Group5	5.26316	3	[KRAS, NOTCH1, NRAS]
GO:0060428	lung epithelium development	GO_BiologicalProcess-EBI-UniProt-GOA-ACAP-ARAP_25.05.2022_00h00	1.47261e-07	3.15559e-07	3.95717e-08	6.92505e-08	[5, 6, 7]	Group5	8.88889	4	[CREB1, KRAS, MAP2K1, NRAS]
GO:0060251	regulation of glial cell proliferation	GO_BiologicalProcess-EBI-UniProt-GOA-ACAP-ARAP_25.05.2022_00h00	8.34758e-06	1.11798e-05	3.95717e-08	6.92505e-08	[4, 5, 7, 8, 9]	Group5	8.10811	3	[KRAS, NOTCH1, NRAS]
GO:0060487	lung epithelial cell differentiation	GO_BiologicalProcess-EBI-UniProt-GOA-ACAP-ARAP_25.05.2022_00h00	3.94746e-06	5.69345e-06	3.95717e-08	6.92505e-08	[5, 6, 7, 8]	Group5	10.3448	3	[CREB1, KRAS, NRAS]
GO:0014015	positive regulation of gliogenesis	GO_BiologicalProcess-EBI-UniProt-GOA-ACAP-ARAP_25.05.2022_00h00	5.74784e-05	5.98733e-05	3.95717e-08	6.92505e-08	[5, 6, 7, 8, 9]	Group5	4.28571	3	[KRAS, NOTCH1, NRAS]
GO:0014002	astrocyte development	GO_BiologicalProcess-EBI-UniProt-GOA-ACAP-ARAP_25.05.2022_00h00	1.62069e-05	2.0602e-05	3.95717e-08	6.92505e-08	[5, 6, 7, 8, 9, 10]	Group5	6.52174	3	[CDK6, KRAS, NRAS]
GO:0046579	positive regulation of Ras protein signal transduction	GO_BiologicalProcess-EBI-UniProt-GOA-ACAP-ARAP_25.05.2022_00h00	6.51716e-05	6.60523e-05	3.95717e-08	6.92505e-08	[6, 7, 8, 9]	Group5	4.10959	3	[KRAS, NOTCH1, NRAS]
GO:0060509	type I pneumocyte differentiation	GO_BiologicalProcess-EBI-UniProt-GOA-ACAP-ARAP_25.05.2022_00h00	9.20139e-08	2.15658e-07	3.95717e-08	6.92505e-08	[6, 7, 8, 9]	Group5	33.3333	3	[CREB1, KRAS, NRAS]
KEGG:04012	ErbB signaling pathway	KEGG_25.05.2022	2.99903e-10	1.87439e-09	1.25129e-13	8.75906e-13	[-1]	Group6	7.05882	6	[ABL1, KRAS, MAP2K1, MAPK1, NRAS, PLCG1]
KEGG:04068	FoxO signaling pathway	KEGG_25.05.2022	5.6823e-11	7.10287e-10	1.25129e-13	8.75906e-13	[-1]	Group6	5.34351	7	[KRAS, MAP2K1, MAPK1, NRAS, SIRT1, SMAD3, SMAD4]
KEGG:04211	Longevity regulating pathway	KEGG_25.05.2022	2.34031e-06	3.81572e-06	1.25129e-13	8.75906e-13	[-1]	Group6	4.49438	4	[CREB1, KRAS, NRAS, SIRT1]
KEGG:04218	Cellular senescence	KEGG_25.05.2022	2.79476e-14	1.04803e-12	1.25129e-13	8.75906e-13	[-1]	Group6	5.76923	9	[BTRC, CDK1, CDK6, KRAS, MAP2K1, MAPK1, NRAS, SIRT1, SMAD3]
KEGG:04370	VEGF signaling pathway	KEGG_25.05.2022	4.27086e-09	1.8842e-08	1.25129e-13	8.75906e-13	[-1]	Group6	8.47458	5	[KRAS, MAP2K1, MAPK1, NRAS, PLCG1]
KEGG:04371	Apelin signaling pathway	KEGG_25.05.2022	5.94346e-09	2.47644e-08	1.25129e-13	8.75906e-13	[-1]	Group6	4.31655	6	[KRAS, MAP2K1, MAPK1, NRAS, SMAD3, SMAD4]
KEGG:04540	Gap junction	KEGG_25.05.2022	3.27662e-08	9.82986e-08	1.25129e-13	8.75906e-13	[-1]	Group6	5.68182	5	[CDK1, KRAS, MAP2K1, MAPK1, NRAS]
KEGG:04550	Signaling pathways regulating pluripotency of stem cells	KEGG_25.05.2022	7.04975e-09	2.7828e-08	1.25129e-13	8.75906e-13	[-1]	Group6	4.1958	6	[KRAS, MAP2K1, MAPK1, NRAS, SMAD3, SMAD4]
KEGG:04660	T cell receptor signaling pathway	KEGG_25.05.2022	7.6082e-08	1.84069e-07	1.25129e-13	8.75906e-13	[-1]	Group6	4.80769	5	[KRAS, MAP2K1, MAPK1, NRAS, PLCG1]
KEGG:04662	B cell receptor signaling pathway	KEGG_25.05.2022	1.68468e-06	2.80781e-06	1.25129e-13	8.75906e-13	[-1]	Group6	4.87805	4	[KRAS, MAP2K1, MAPK1, NRAS]
KEGG:04664	Fc epsilon RI signaling pathway	KEGG_25.05.2022	8.83828e-09	3.15653e-08	1.25129e-13	8.75906e-13	[-1]	Group6	7.35294	5	[KRAS, MAP2K1, MAPK1, NRAS, PLCG1]
KEGG:04720	Long-term potentiation	KEGG_25.05.2022	7.4603e-07	1.3322e-06	1.25129e-13	8.75906e-13	[-1]	Group6	5.97015	4	[KRAS, MAP2K1, MAPK1, NRAS]
KEGG:04722	Neurotrophin signaling pathway	KEGG_25.05.2022	2.32712e-09	1.16356e-08	1.25129e-13	8.75906e-13	[-1]	Group6	5.04202	6	[ABL1, KRAS, MAP2K1, MAPK1, NRAS, PLCG1]
KEGG:04725	Cholinergic synapse	KEGG_25.05.2022	1.15415e-07	2.54592e-07	1.25129e-13	8.75906e-13	[-1]	Group6	4.42478	5	[CREB1, KRAS, MAP2K1, MAPK1, NRAS]
KEGG:04730	Long-term depression	KEGG_25.05.2022	4.76947e-07	9.17205e-07	1.25129e-13	8.75906e-13	[-1]	Group6	6.66667	4	[KRAS, MAP2K1, MAPK1, NRAS]
KEGG:04912	GnRH signaling pathway	KEGG_25.05.2022	2.79078e-06	4.3606e-06	1.25129e-13	8.75906e-13	[-1]	Group6	4.30108	4	[KRAS, MAP2K1, MAPK1, NRAS]
KEGG:04916	Melanogenesis	KEGG_25.05.2022	6.56648e-08	1.64162e-07	1.25129e-13	8.75906e-13	[-1]	Group6	4.9505	5	[CREB1, KRAS, MAP2K1, MAPK1, NRAS]
KEGG:04917	Prolactin signaling pathway	KEGG_25.05.2022	8.90568e-07	1.51801e-06	1.25129e-13	8.75906e-13	[-1]	Group6	5.71429	4	[KRAS, MAP2K1, MAPK1, NRAS]
KEGG:04919	Thyroid hormone signaling pathway	KEGG_25.05.2022	3.23492e-11	4.85238e-10	1.25129e-13	8.75906e-13	[-1]	Group6	5.78512	7	[ACTB, KRAS, MAP2K1, MAPK1, NOTCH1, NRAS, PLCG1]
KEGG:04929	GnRH secretion	KEGG_25.05.2022	6.19719e-07	1.13363e-06	1.25129e-13	8.75906e-13	[-1]	Group6	6.25	4	[KRAS, MAP2K1, MAPK1, NRAS]
KEGG:04933	AGE-RAGE signaling pathway in diabetic complications	KEGG_25.05.2022	8.09426e-10	4.33621e-09	1.25129e-13	8.75906e-13	[-1]	Group6	6	6	[KRAS, MAPK1, NRAS, PLCG1, SMAD3, SMAD4]
KEGG:04935	Growth hormone synthesis, secretion and action	KEGG_25.05.2022	2.32712e-09	1.16356e-08	1.25129e-13	8.75906e-13	[-1]	Group6	5.04202	6	[CREB1, KRAS, MAP2K1, MAPK1, NRAS, PLCG1]
KEGG:05161	Hepatitis B	KEGG_25.05.2022	2.54441e-10	1.73482e-09	1.25129e-13	8.75906e-13	[-1]	Group6	4.32099	7	[CREB1, KRAS, MAP2K1, MAPK1, NRAS, SMAD3, SMAD4]
KEGG:05210	Colorectal cancer	KEGG_25.05.2022	3.22185e-10	1.85876e-09	1.25129e-13	8.75906e-13	[-1]	Group6	6.97674	6	[KRAS, MAP2K1, MAPK1, NRAS, SMAD3, SMAD4]
KEGG:05211	Renal cell carcinoma	KEGG_25.05.2022	8.40264e-07	1.46558e-06	1.25129e-13	8.75906e-13	[-1]	Group6	5.7971	4	[KRAS, MAP2K1, MAPK1, NRAS]
KEGG:05212	Pancreatic cancer	KEGG_25.05.2022	1.50798e-10	1.13098e-09	1.25129e-13	8.75906e-13	[-1]	Group6	7.89474	6	[CDK6, KRAS, MAP2K1, MAPK1, SMAD3, SMAD4]
KEGG:05213	Endometrial cancer	KEGG_25.05.2022	4.15549e-07	8.20163e-07	1.25129e-13	8.75906e-13	[-1]	Group6	6.89655	4	[KRAS, MAP2K1, MAPK1, NRAS]
KEGG:05214	Glioma	KEGG_25.05.2022	1.38983e-10	1.30297e-09	1.25129e-13	8.75906e-13	[-1]	Group6	8	6	[CDK6, KRAS, MAP2K1, MAPK1, NRAS, PLCG1]
KEGG:05215	Prostate cancer	KEGG_25.05.2022	5.35723e-08	1.48812e-07	1.25129e-13	8.75906e-13	[-1]	Group6	5.15464	5	[CREB1, KRAS, MAP2K1, MAPK1, NRAS]
KEGG:05216	Thyroid cancer	KEGG_25.05.2022	6.56412e-08	1.69762e-07	1.25129e-13	8.75906e-13	[-1]	Group6	10.8108	4	[KRAS, MAP2K1, MAPK1, NRAS]
KEGG:05218	Melanoma	KEGG_25.05.2022	1.18307e-08	3.69709e-08	1.25129e-13	8.75906e-13	[-1]	Group6	6.94444	5	[CDK6, KRAS, MAP2K1, MAPK1, NRAS]
KEGG:05219	Bladder cancer	KEGG_25.05.2022	1.00371e-07	2.28115e-07	1.25129e-13	8.75906e-13	[-1]	Group6	9.7561	4	[KRAS, MAP2K1, MAPK1, NRAS]
KEGG:05220	Chronic myeloid leukemia	KEGG_25.05.2022	7.04817e-15	5.28613e-13	1.25129e-13	8.75906e-13	[-1]	Group6	10.5263	8	[ABL1, CDK6, KRAS, MAP2K1, MAPK1, NRAS, SMAD3, SMAD4]
KEGG:05221	Acute myeloid leukemia	KEGG_25.05.2022	7.4603e-07	1.3322e-06	1.25129e-13	8.75906e-13	[-1]	Group6	5.97015	4	[KRAS, MAP2K1, MAPK1, NRAS]
KEGG:05223	Non-small cell lung cancer	KEGG_25.05.2022	1.08052e-10	1.1577e-09	1.25129e-13	8.75906e-13	[-1]	Group6	8.33333	6	[CDK6, KRAS, MAP2K1, MAPK1, NRAS, PLCG1]
KEGG:05224	Breast cancer	KEGG_25.05.2022	8.32135e-09	3.12051e-08	1.25129e-13	8.75906e-13	[-1]	Group6	4.08163	6	[CDK6, KRAS, MAP2K1, MAPK1, NOTCH1, NRAS]
KEGG:05225	Hepatocellular carcinoma	KEGG_25.05.2022	5.50299e-14	1.37575e-12	1.25129e-13	8.75906e-13	[-1]	Group6	5.35714	9	[ACTB, CDK6, KRAS, MAP2K1, MAPK1, NRAS, PLCG1, SMAD3, SMAD4]
KEGG:05226	Gastric cancer	KEGG_25.05.2022	9.025e-09	3.07671e-08	1.25129e-13	8.75906e-13	[-1]	Group6	4.02685	6	[KRAS, MAP2K1, MAPK1, NRAS, SMAD3, SMAD4]
KEGG:05230	Central carbon metabolism in cancer	KEGG_25.05.2022	8.90568e-07	1.51801e-06	1.25129e-13	8.75906e-13	[-1]	Group6	5.71429	4	[KRAS, MAP2K1, MAPK1, NRAS]
KEGG:05231	Choline metabolism in cancer	KEGG_25.05.2022	5.64141e-08	1.51109e-07	1.25129e-13	8.75906e-13	[-1]	Group6	5.10204	5	[KRAS, MAP2K1, MAPK1, NRAS, PLCG1]
KEGG:05235	PD-L1 expression and PD-1 checkpoint pathway in cancer	KEGG_25.05.2022	3.46929e-08	1.00076e-07	1.25129e-13	8.75906e-13	[-1]	Group6	5.61798	5	[KRAS, MAP2K1, MAPK1, NRAS, PLCG1]
GO:0048645	animal organ formation	GO_BiologicalProcess-EBI-UniProt-GOA-ACAP-ARAP_25.05.2022_00h00	7.06575e-05	7.06575e-05	1.25129e-13	8.75906e-13	[3, 4, 5]	Group6	4	3	[MAP2K1, MAPK1, NOTCH1]
GO:0035270	endocrine system development	GO_BiologicalProcess-EBI-UniProt-GOA-ACAP-ARAP_25.05.2022_00h00	1.41171e-10	1.17643e-09	1.25129e-13	8.75906e-13	[4, 5]	Group6	4.69799	7	[CDK6, CREB1, HNF4A, MAP2K1, MAPK1, SMAD3, SMAD4]
GO:0048308	organelle inheritance	GO_BiologicalProcess-EBI-UniProt-GOA-ACAP-ARAP_25.05.2022_00h00	6.10455e-07	1.1446e-06	1.25129e-13	8.75906e-13	[5]	Group6	18.75	3	[CDK1, MAP2K1, MAPK1]
GO:0048873	homeostasis of number of cells within a tissue	GO_BiologicalProcess-EBI-UniProt-GOA-ACAP-ARAP_25.05.2022_00h00	9.80473e-06	1.2901e-05	1.25129e-13	8.75906e-13	[4, 5, 6]	Group6	7.69231	3	[KRAS, NOTCH1, NRAS]
GO:0030857	negative regulation of epithelial cell differentiation	GO_BiologicalProcess-EBI-UniProt-GOA-ACAP-ARAP_25.05.2022_00h00	2.48896e-05	2.96305e-05	1.25129e-13	8.75906e-13	[4, 5, 6, 7]	Group6	5.66038	3	[KRAS, NOTCH1, NRAS]
GO:0030878	thyroid gland development	GO_BiologicalProcess-EBI-UniProt-GOA-ACAP-ARAP_25.05.2022_00h00	4.84927e-06	6.7351e-06	1.25129e-13	8.75906e-13	[5, 6]	Group6	9.67742	3	[MAP2K1, MAPK1, SMAD3]
GO:0048538	thymus development	GO_BiologicalProcess-EBI-UniProt-GOA-ACAP-ARAP_25.05.2022_00h00	2.34971e-05	2.84239e-05	1.25129e-13	8.75906e-13	[4, 5, 6, 7]	Group6	5.76923	3	[ABL1, MAP2K1, MAPK1]
GO:0060425	lung morphogenesis	GO_BiologicalProcess-EBI-UniProt-GOA-ACAP-ARAP_25.05.2022_00h00	2.66272e-07	5.3974e-07	1.25129e-13	8.75906e-13	[4, 5, 6, 7]	Group6	7.69231	4	[KRAS, MAP2K1, MAPK1, NRAS]
GO:0060479	lung cell differentiation	GO_BiologicalProcess-EBI-UniProt-GOA-ACAP-ARAP_25.05.2022_00h00	3.94746e-06	5.69345e-06	1.25129e-13	8.75906e-13	[4, 5, 6, 7]	Group6	10.3448	3	[CREB1, KRAS, NRAS]
GO:0035914	skeletal muscle cell differentiation	GO_BiologicalProcess-EBI-UniProt-GOA-ACAP-ARAP_25.05.2022_00h00	7.06575e-05	7.06575e-05	1.25129e-13	8.75906e-13	[4, 6, 7]	Group6	4	3	[KRAS, NOTCH1, NRAS]
GO:0014009	glial cell proliferation	GO_BiologicalProcess-EBI-UniProt-GOA-ACAP-ARAP_25.05.2022_00h00	3.1002e-05	3.63305e-05	1.25129e-13	8.75906e-13	[3, 6, 7, 8]	Group6	5.26316	3	[KRAS, NOTCH1, NRAS]
GO:0048313	Golgi inheritance	GO_BiologicalProcess-EBI-UniProt-GOA-ACAP-ARAP_25.05.2022_00h00	6.10455e-07	1.1446e-06	1.25129e-13	8.75906e-13	[6]	Group6	18.75	3	[CDK1, MAP2K1, MAPK1]
GO:0060428	lung epithelium development	GO_BiologicalProcess-EBI-UniProt-GOA-ACAP-ARAP_25.05.2022_00h00	1.47261e-07	3.15559e-07	1.25129e-13	8.75906e-13	[5, 6, 7]	Group6	8.88889	4	[CREB1, KRAS, MAP2K1, NRAS]
GO:0060251	regulation of glial cell proliferation	GO_BiologicalProcess-EBI-UniProt-GOA-ACAP-ARAP_25.05.2022_00h00	8.34758e-06	1.11798e-05	1.25129e-13	8.75906e-13	[4, 5, 7, 8, 9]	Group6	8.10811	3	[KRAS, NOTCH1, NRAS]
GO:0060487	lung epithelial cell differentiation	GO_BiologicalProcess-EBI-UniProt-GOA-ACAP-ARAP_25.05.2022_00h00	3.94746e-06	5.69345e-06	1.25129e-13	8.75906e-13	[5, 6, 7, 8]	Group6	10.3448	3	[CREB1, KRAS, NRAS]
GO:0014015	positive regulation of gliogenesis	GO_BiologicalProcess-EBI-UniProt-GOA-ACAP-ARAP_25.05.2022_00h00	5.74784e-05	5.98733e-05	1.25129e-13	8.75906e-13	[5, 6, 7, 8, 9]	Group6	4.28571	3	[KRAS, NOTCH1, NRAS]
GO:0048708	astrocyte differentiation	GO_BiologicalProcess-EBI-UniProt-GOA-ACAP-ARAP_25.05.2022_00h00	3.90231e-12	7.31683e-11	1.25129e-13	8.75906e-13	[5, 6, 7, 8, 9]	Group6	7.77778	7	[ABL1, CDK6, KRAS, MAP2K1, MAPK1, NOTCH1, NRAS]
GO:0014002	astrocyte development	GO_BiologicalProcess-EBI-UniProt-GOA-ACAP-ARAP_25.05.2022_00h00	1.62069e-05	2.0602e-05	1.25129e-13	8.75906e-13	[5, 6, 7, 8, 9, 10]	Group6	6.52174	3	[CDK6, KRAS, NRAS]
GO:0046579	positive regulation of Ras protein signal transduction	GO_BiologicalProcess-EBI-UniProt-GOA-ACAP-ARAP_25.05.2022_00h00	6.51716e-05	6.60523e-05	1.25129e-13	8.75906e-13	[6, 7, 8, 9]	Group6	4.10959	3	[KRAS, NOTCH1, NRAS]
GO:0060509	type I pneumocyte differentiation	GO_BiologicalProcess-EBI-UniProt-GOA-ACAP-ARAP_25.05.2022_00h00	9.20139e-08	2.15658e-07	1.25129e-13	8.75906e-13	[6, 7, 8, 9]	Group6	33.3333	3	[CREB1, KRAS, NRAS]
GO:0060020	Bergmann glial cell differentiation	GO_BiologicalProcess-EBI-UniProt-GOA-ACAP-ARAP_25.05.2022_00h00	1.80491e-07	3.76023e-07	1.25129e-13	8.75906e-13	[6, 7, 8, 9, 10]	Group6	27.2727	3	[ABL1, MAP2K1, MAPK1]

## Sheet: ClueGO Results (2)
ID	Term	Ontology Source	Term PValue	Term PValue Corrected with Benjamini-Hochberg	Group PValue	Group PValue Corrected with Benjamini-Hochberg	GOLevels	GOGroups	% Associated Genes	Nr. Genes	Associated Genes Found
KEGG:05220	Chronic myeloid leukemia	KEGG_25.05.2022	7.04817e-15	5.28613e-13	1.25129e-13	8.75906e-13	[-1]	Group6	10.5263	8	[ABL1, CDK6, KRAS, MAP2K1, MAPK1, NRAS, SMAD3, SMAD4]
KEGG:04218	Cellular senescence	KEGG_25.05.2022	2.79476e-14	1.04803e-12	1.25129e-13	8.75906e-13	[-1]	Group6	5.76923	9	[BTRC, CDK1, CDK6, KRAS, MAP2K1, MAPK1, NRAS, SIRT1, SMAD3]
KEGG:05225	Hepatocellular carcinoma	KEGG_25.05.2022	5.50299e-14	1.37575e-12	1.25129e-13	8.75906e-13	[-1]	Group6	5.35714	9	[ACTB, CDK6, KRAS, MAP2K1, MAPK1, NRAS, PLCG1, SMAD3, SMAD4]
GO:0048708	astrocyte differentiation	GO_BiologicalProcess-EBI-UniProt-GOA-ACAP-ARAP_25.05.2022_00h00	3.90231e-12	7.31683e-11	1.25129e-13	8.75906e-13	[5, 6, 7, 8, 9]	Group6	7.77778	7	[ABL1, CDK6, KRAS, MAP2K1, MAPK1, NOTCH1, NRAS]
KEGG:04919	Thyroid hormone signaling pathway	KEGG_25.05.2022	3.23492e-11	4.85238e-10	1.25129e-13	8.75906e-13	[-1]	Group6	5.78512	7	[ACTB, KRAS, MAP2K1, MAPK1, NOTCH1, NRAS, PLCG1]
KEGG:04068	FoxO signaling pathway	KEGG_25.05.2022	5.6823e-11	7.10287e-10	1.25129e-13	8.75906e-13	[-1]	Group6	5.34351	7	[KRAS, MAP2K1, MAPK1, NRAS, SIRT1, SMAD3, SMAD4]
KEGG:05223	Non-small cell lung cancer	KEGG_25.05.2022	1.08052e-10	1.1577e-09	3.95717e-08	6.92505e-08	[-1]	Group5	8.33333	6	[CDK6, KRAS, MAP2K1, MAPK1, NRAS, PLCG1]
KEGG:05223	Non-small cell lung cancer	KEGG_25.05.2022	1.08052e-10	1.1577e-09	1.25129e-13	8.75906e-13	[-1]	Group6	8.33333	6	[CDK6, KRAS, MAP2K1, MAPK1, NRAS, PLCG1]
KEGG:05214	Glioma	KEGG_25.05.2022	1.38983e-10	1.30297e-09	3.95717e-08	6.92505e-08	[-1]	Group5	8	6	[CDK6, KRAS, MAP2K1, MAPK1, NRAS, PLCG1]
KEGG:05214	Glioma	KEGG_25.05.2022	1.38983e-10	1.30297e-09	1.25129e-13	8.75906e-13	[-1]	Group6	8	6	[CDK6, KRAS, MAP2K1, MAPK1, NRAS, PLCG1]
GO:0035270	endocrine system development	GO_BiologicalProcess-EBI-UniProt-GOA-ACAP-ARAP_25.05.2022_00h00	1.41171e-10	1.17643e-09	1.25129e-13	8.75906e-13	[4, 5]	Group6	4.69799	7	[CDK6, CREB1, HNF4A, MAP2K1, MAPK1, SMAD3, SMAD4]
KEGG:05212	Pancreatic cancer	KEGG_25.05.2022	1.50798e-10	1.13098e-09	1.25129e-13	8.75906e-13	[-1]	Group6	7.89474	6	[CDK6, KRAS, MAP2K1, MAPK1, SMAD3, SMAD4]
KEGG:05161	Hepatitis B	KEGG_25.05.2022	2.54441e-10	1.73482e-09	1.25129e-13	8.75906e-13	[-1]	Group6	4.32099	7	[CREB1, KRAS, MAP2K1, MAPK1, NRAS, SMAD3, SMAD4]
KEGG:04012	ErbB signaling pathway	KEGG_25.05.2022	2.99903e-10	1.87439e-09	1.25129e-13	8.75906e-13	[-1]	Group6	7.05882	6	[ABL1, KRAS, MAP2K1, MAPK1, NRAS, PLCG1]
KEGG:05210	Colorectal cancer	KEGG_25.05.2022	3.22185e-10	1.85876e-09	1.25129e-13	8.75906e-13	[-1]	Group6	6.97674	6	[KRAS, MAP2K1, MAPK1, NRAS, SMAD3, SMAD4]
KEGG:04933	AGE-RAGE signaling pathway in diabetic complications	KEGG_25.05.2022	8.09426e-10	4.33621e-09	1.25129e-13	8.75906e-13	[-1]	Group6	6	6	[KRAS, MAPK1, NRAS, PLCG1, SMAD3, SMAD4]
KEGG:04935	Growth hormone synthesis, secretion and action	KEGG_25.05.2022	2.32712e-09	1.16356e-08	3.95717e-08	6.92505e-08	[-1]	Group5	5.04202	6	[CREB1, KRAS, MAP2K1, MAPK1, NRAS, PLCG1]
KEGG:04722	Neurotrophin signaling pathway	KEGG_25.05.2022	2.32712e-09	1.16356e-08	1.25129e-13	8.75906e-13	[-1]	Group6	5.04202	6	[ABL1, KRAS, MAP2K1, MAPK1, NRAS, PLCG1]
KEGG:04935	Growth hormone synthesis, secretion and action	KEGG_25.05.2022	2.32712e-09	1.16356e-08	1.25129e-13	8.75906e-13	[-1]	Group6	5.04202	6	[CREB1, KRAS, MAP2K1, MAPK1, NRAS, PLCG1]
KEGG:04110	Cell cycle	KEGG_25.05.2022	3.28778e-09	1.54115e-08	1.21127e-10	4.23944e-10	[-1]	Group3	4.7619	6	[ABL1, CDK1, CDK6, SKP1, SMAD3, SMAD4]
KEGG:04370	VEGF signaling pathway	KEGG_25.05.2022	4.27086e-09	1.8842e-08	1.25129e-13	8.75906e-13	[-1]	Group6	8.47458	5	[KRAS, MAP2K1, MAPK1, NRAS, PLCG1]
KEGG:04371	Apelin signaling pathway	KEGG_25.05.2022	5.94346e-09	2.47644e-08	1.25129e-13	8.75906e-13	[-1]	Group6	4.31655	6	[KRAS, MAP2K1, MAPK1, NRAS, SMAD3, SMAD4]
KEGG:04550	Signaling pathways regulating pluripotency of stem cells	KEGG_25.05.2022	7.04975e-09	2.7828e-08	1.25129e-13	8.75906e-13	[-1]	Group6	4.1958	6	[KRAS, MAP2K1, MAPK1, NRAS, SMAD3, SMAD4]
KEGG:05224	Breast cancer	KEGG_25.05.2022	8.32135e-09	3.12051e-08	3.95717e-08	6.92505e-08	[-1]	Group5	4.08163	6	[CDK6, KRAS, MAP2K1, MAPK1, NOTCH1, NRAS]
KEGG:05224	Breast cancer	KEGG_25.05.2022	8.32135e-09	3.12051e-08	1.25129e-13	8.75906e-13	[-1]	Group6	4.08163	6	[CDK6, KRAS, MAP2K1, MAPK1, NOTCH1, NRAS]
KEGG:04664	Fc epsilon RI signaling pathway	KEGG_25.05.2022	8.83828e-09	3.15653e-08	1.25129e-13	8.75906e-13	[-1]	Group6	7.35294	5	[KRAS, MAP2K1, MAPK1, NRAS, PLCG1]
KEGG:05226	Gastric cancer	KEGG_25.05.2022	9.025e-09	3.07671e-08	1.25129e-13	8.75906e-13	[-1]	Group6	4.02685	6	[KRAS, MAP2K1, MAPK1, NRAS, SMAD3, SMAD4]
KEGG:04520	Adherens junction	KEGG_25.05.2022	1.10166e-08	3.59238e-08	1.18876e-08	2.77376e-08	[-1]	Group0	7.04225	5	[ACTB, MAPK1, SMAD3, SMAD4, VCL]
KEGG:05218	Melanoma	KEGG_25.05.2022	1.18307e-08	3.69709e-08	3.95717e-08	6.92505e-08	[-1]	Group5	6.94444	5	[CDK6, KRAS, MAP2K1, MAPK1, NRAS]
KEGG:05218	Melanoma	KEGG_25.05.2022	1.18307e-08	3.69709e-08	1.25129e-13	8.75906e-13	[-1]	Group6	6.94444	5	[CDK6, KRAS, MAP2K1, MAPK1, NRAS]
KEGG:04540	Gap junction	KEGG_25.05.2022	3.27662e-08	9.82986e-08	1.25129e-13	8.75906e-13	[-1]	Group6	5.68182	5	[CDK1, KRAS, MAP2K1, MAPK1, NRAS]
KEGG:05235	PD-L1 expression and PD-1 checkpoint pathway in cancer	KEGG_25.05.2022	3.46929e-08	1.00076e-07	1.25129e-13	8.75906e-13	[-1]	Group6	5.61798	5	[KRAS, MAP2K1, MAPK1, NRAS, PLCG1]
KEGG:05215	Prostate cancer	KEGG_25.05.2022	5.35723e-08	1.48812e-07	3.95717e-08	6.92505e-08	[-1]	Group5	5.15464	5	[CREB1, KRAS, MAP2K1, MAPK1, NRAS]
KEGG:05215	Prostate cancer	KEGG_25.05.2022	5.35723e-08	1.48812e-07	1.25129e-13	8.75906e-13	[-1]	Group6	5.15464	5	[CREB1, KRAS, MAP2K1, MAPK1, NRAS]
KEGG:05231	Choline metabolism in cancer	KEGG_25.05.2022	5.64141e-08	1.51109e-07	1.25129e-13	8.75906e-13	[-1]	Group6	5.10204	5	[KRAS, MAP2K1, MAPK1, NRAS, PLCG1]
KEGG:05216	Thyroid cancer	KEGG_25.05.2022	6.56412e-08	1.69762e-07	1.25129e-13	8.75906e-13	[-1]	Group6	10.8108	4	[KRAS, MAP2K1, MAPK1, NRAS]
KEGG:04916	Melanogenesis	KEGG_25.05.2022	6.56648e-08	1.64162e-07	3.95717e-08	6.92505e-08	[-1]	Group5	4.9505	5	[CREB1, KRAS, MAP2K1, MAPK1, NRAS]
KEGG:04916	Melanogenesis	KEGG_25.05.2022	6.56648e-08	1.64162e-07	1.25129e-13	8.75906e-13	[-1]	Group6	4.9505	5	[CREB1, KRAS, MAP2K1, MAPK1, NRAS]
KEGG:04660	T cell receptor signaling pathway	KEGG_25.05.2022	7.6082e-08	1.84069e-07	1.25129e-13	8.75906e-13	[-1]	Group6	4.80769	5	[KRAS, MAP2K1, MAPK1, NRAS, PLCG1]
GO:0060509	type I pneumocyte differentiation	GO_BiologicalProcess-EBI-UniProt-GOA-ACAP-ARAP_25.05.2022_00h00	9.20139e-08	2.15658e-07	3.95717e-08	6.92505e-08	[6, 7, 8, 9]	Group5	33.3333	3	[CREB1, KRAS, NRAS]
GO:0060509	type I pneumocyte differentiation	GO_BiologicalProcess-EBI-UniProt-GOA-ACAP-ARAP_25.05.2022_00h00	9.20139e-08	2.15658e-07	1.25129e-13	8.75906e-13	[6, 7, 8, 9]	Group6	33.3333	3	[CREB1, KRAS, NRAS]
KEGG:05219	Bladder cancer	KEGG_25.05.2022	1.00371e-07	2.28115e-07	1.25129e-13	8.75906e-13	[-1]	Group6	9.7561	4	[KRAS, MAP2K1, MAPK1, NRAS]
KEGG:04725	Cholinergic synapse	KEGG_25.05.2022	1.15415e-07	2.54592e-07	3.95717e-08	6.92505e-08	[-1]	Group5	4.42478	5	[CREB1, KRAS, MAP2K1, MAPK1, NRAS]
KEGG:04725	Cholinergic synapse	KEGG_25.05.2022	1.15415e-07	2.54592e-07	1.25129e-13	8.75906e-13	[-1]	Group6	4.42478	5	[CREB1, KRAS, MAP2K1, MAPK1, NRAS]
GO:0060428	lung epithelium development	GO_BiologicalProcess-EBI-UniProt-GOA-ACAP-ARAP_25.05.2022_00h00	1.47261e-07	3.15559e-07	3.95717e-08	6.92505e-08	[5, 6, 7]	Group5	8.88889	4	[CREB1, KRAS, MAP2K1, NRAS]
GO:0060428	lung epithelium development	GO_BiologicalProcess-EBI-UniProt-GOA-ACAP-ARAP_25.05.2022_00h00	1.47261e-07	3.15559e-07	1.25129e-13	8.75906e-13	[5, 6, 7]	Group6	8.88889	4	[CREB1, KRAS, MAP2K1, NRAS]
GO:0060020	Bergmann glial cell differentiation	GO_BiologicalProcess-EBI-UniProt-GOA-ACAP-ARAP_25.05.2022_00h00	1.80491e-07	3.76023e-07	1.25129e-13	8.75906e-13	[6, 7, 8, 9, 10]	Group6	27.2727	3	[ABL1, MAP2K1, MAPK1]
GO:0060425	lung morphogenesis	GO_BiologicalProcess-EBI-UniProt-GOA-ACAP-ARAP_25.05.2022_00h00	2.66272e-07	5.3974e-07	1.25129e-13	8.75906e-13	[4, 5, 6, 7]	Group6	7.69231	4	[KRAS, MAP2K1, MAPK1, NRAS]
KEGG:05213	Endometrial cancer	KEGG_25.05.2022	4.15549e-07	8.20163e-07	1.25129e-13	8.75906e-13	[-1]	Group6	6.89655	4	[KRAS, MAP2K1, MAPK1, NRAS]
KEGG:04730	Long-term depression	KEGG_25.05.2022	4.76947e-07	9.17205e-07	1.25129e-13	8.75906e-13	[-1]	Group6	6.66667	4	[KRAS, MAP2K1, MAPK1, NRAS]
GO:0048308	organelle inheritance	GO_BiologicalProcess-EBI-UniProt-GOA-ACAP-ARAP_25.05.2022_00h00	6.10455e-07	1.1446e-06	1.25129e-13	8.75906e-13	[5]	Group6	18.75	3	[CDK1, MAP2K1, MAPK1]
GO:0048313	Golgi inheritance	GO_BiologicalProcess-EBI-UniProt-GOA-ACAP-ARAP_25.05.2022_00h00	6.10455e-07	1.1446e-06	1.25129e-13	8.75906e-13	[6]	Group6	18.75	3	[CDK1, MAP2K1, MAPK1]
KEGG:04929	GnRH secretion	KEGG_25.05.2022	6.19719e-07	1.13363e-06	1.25129e-13	8.75906e-13	[-1]	Group6	6.25	4	[KRAS, MAP2K1, MAPK1, NRAS]
KEGG:04720	Long-term potentiation	KEGG_25.05.2022	7.4603e-07	1.3322e-06	1.25129e-13	8.75906e-13	[-1]	Group6	5.97015	4	[KRAS, MAP2K1, MAPK1, NRAS]
KEGG:05221	Acute myeloid leukemia	KEGG_25.05.2022	7.4603e-07	1.3322e-06	1.25129e-13	8.75906e-13	[-1]	Group6	5.97015	4	[KRAS, MAP2K1, MAPK1, NRAS]
KEGG:05211	Renal cell carcinoma	KEGG_25.05.2022	8.40264e-07	1.46558e-06	1.25129e-13	8.75906e-13	[-1]	Group6	5.7971	4	[KRAS, MAP2K1, MAPK1, NRAS]
KEGG:04917	Prolactin signaling pathway	KEGG_25.05.2022	8.90568e-07	1.51801e-06	1.25129e-13	8.75906e-13	[-1]	Group6	5.71429	4	[KRAS, MAP2K1, MAPK1, NRAS]
KEGG:05230	Central carbon metabolism in cancer	KEGG_25.05.2022	8.90568e-07	1.51801e-06	1.25129e-13	8.75906e-13	[-1]	Group6	5.71429	4	[KRAS, MAP2K1, MAPK1, NRAS]
KEGG:04662	B cell receptor signaling pathway	KEGG_25.05.2022	1.68468e-06	2.80781e-06	1.25129e-13	8.75906e-13	[-1]	Group6	4.87805	4	[KRAS, MAP2K1, MAPK1, NRAS]
KEGG:04211	Longevity regulating pathway	KEGG_25.05.2022	2.34031e-06	3.81572e-06	3.95717e-08	6.92505e-08	[-1]	Group5	4.49438	4	[CREB1, KRAS, NRAS, SIRT1]
KEGG:04211	Longevity regulating pathway	KEGG_25.05.2022	2.34031e-06	3.81572e-06	1.25129e-13	8.75906e-13	[-1]	Group6	4.49438	4	[CREB1, KRAS, NRAS, SIRT1]
GO:0007492	endoderm development	GO_BiologicalProcess-EBI-UniProt-GOA-ACAP-ARAP_25.05.2022_00h00	2.67261e-06	4.26481e-06	4.31144e-07	5.03001e-07	[4]	Group4	4.34783	4	[MAP2K1, NOTCH1, SMAD3, SMAD4]
KEGG:04912	GnRH signaling pathway	KEGG_25.05.2022	2.79078e-06	4.3606e-06	1.25129e-13	8.75906e-13	[-1]	Group6	4.30108	4	[KRAS, MAP2K1, MAPK1, NRAS]
GO:2000773	negative regulation of cellular senescence	GO_BiologicalProcess-EBI-UniProt-GOA-ACAP-ARAP_25.05.2022_00h00	2.81466e-06	4.30816e-06	1.05395e-07	1.47552e-07	[4, 5, 6]	Group2	11.5385	3	[ABL1, CDK6, SIRT1]
GO:2000773	negative regulation of cellular senescence	GO_BiologicalProcess-EBI-UniProt-GOA-ACAP-ARAP_25.05.2022_00h00	2.81466e-06	4.30816e-06	1.21127e-10	4.23944e-10	[4, 5, 6]	Group3	11.5385	3	[ABL1, CDK6, SIRT1]
KEGG:04350	TGF-beta signaling pathway	KEGG_25.05.2022	2.91278e-06	4.36918e-06	1.18876e-08	2.77376e-08	[-1]	Group0	4.25532	4	[MAPK1, SKP1, SMAD3, SMAD4]
GO:0043535	regulation of blood vessel endothelial cell migration	GO_BiologicalProcess-EBI-UniProt-GOA-ACAP-ARAP_25.05.2022_00h00	3.30259e-06	4.85674e-06	1.05395e-07	1.47552e-07	[5, 6, 7, 8]	Group2	4.12371	4	[ABL1, NOTCH1, PLCG1, SIRT1]
GO:0060479	lung cell differentiation	GO_BiologicalProcess-EBI-UniProt-GOA-ACAP-ARAP_25.05.2022_00h00	3.94746e-06	5.69345e-06	3.95717e-08	6.92505e-08	[4, 5, 6, 7]	Group5	10.3448	3	[CREB1, KRAS, NRAS]
GO:0060487	lung epithelial cell differentiation	GO_BiologicalProcess-EBI-UniProt-GOA-ACAP-ARAP_25.05.2022_00h00	3.94746e-06	5.69345e-06	3.95717e-08	6.92505e-08	[5, 6, 7, 8]	Group5	10.3448	3	[CREB1, KRAS, NRAS]
GO:0060479	lung cell differentiation	GO_BiologicalProcess-EBI-UniProt-GOA-ACAP-ARAP_25.05.2022_00h00	3.94746e-06	5.69345e-06	1.25129e-13	8.75906e-13	[4, 5, 6, 7]	Group6	10.3448	3	[CREB1, KRAS, NRAS]
GO:0060487	lung epithelial cell differentiation	GO_BiologicalProcess-EBI-UniProt-GOA-ACAP-ARAP_25.05.2022_00h00	3.94746e-06	5.69345e-06	1.25129e-13	8.75906e-13	[5, 6, 7, 8]	Group6	10.3448	3	[CREB1, KRAS, NRAS]
GO:0010614	negative regulation of cardiac muscle hypertrophy	GO_BiologicalProcess-EBI-UniProt-GOA-ACAP-ARAP_25.05.2022_00h00	4.38303e-06	6.2024e-06	4.31144e-07	5.03001e-07	[4, 5, 6, 7, 8]	Group4	10	3	[NOTCH1, SMAD3, SMAD4]
KEGG:04710	Circadian rhythm	KEGG_25.05.2022	4.84927e-06	6.7351e-06	2.79078e-06	2.79078e-06	[-1]	Group1	9.67742	3	[BTRC, CREB1, SKP1]
GO:0030878	thyroid gland development	GO_BiologicalProcess-EBI-UniProt-GOA-ACAP-ARAP_25.05.2022_00h00	4.84927e-06	6.7351e-06	1.25129e-13	8.75906e-13	[5, 6]	Group6	9.67742	3	[MAP2K1, MAPK1, SMAD3]
GO:0014741	negative regulation of muscle hypertrophy	GO_BiologicalProcess-EBI-UniProt-GOA-ACAP-ARAP_25.05.2022_00h00	5.34721e-06	7.29165e-06	4.31144e-07	5.03001e-07	[3, 4, 5, 6, 7]	Group4	9.375	3	[NOTCH1, SMAD3, SMAD4]
GO:0060251	regulation of glial cell proliferation	GO_BiologicalProcess-EBI-UniProt-GOA-ACAP-ARAP_25.05.2022_00h00	8.34758e-06	1.11798e-05	3.95717e-08	6.92505e-08	[4, 5, 7, 8, 9]	Group5	8.10811	3	[KRAS, NOTCH1, NRAS]
GO:0060251	regulation of glial cell proliferation	GO_BiologicalProcess-EBI-UniProt-GOA-ACAP-ARAP_25.05.2022_00h00	8.34758e-06	1.11798e-05	1.25129e-13	8.75906e-13	[4, 5, 7, 8, 9]	Group6	8.10811	3	[KRAS, NOTCH1, NRAS]
GO:0048873	homeostasis of number of cells within a tissue	GO_BiologicalProcess-EBI-UniProt-GOA-ACAP-ARAP_25.05.2022_00h00	9.80473e-06	1.2901e-05	3.95717e-08	6.92505e-08	[4, 5, 6]	Group5	7.69231	3	[KRAS, NOTCH1, NRAS]
GO:0048873	homeostasis of number of cells within a tissue	GO_BiologicalProcess-EBI-UniProt-GOA-ACAP-ARAP_25.05.2022_00h00	9.80473e-06	1.2901e-05	1.25129e-13	8.75906e-13	[4, 5, 6]	Group6	7.69231	3	[KRAS, NOTCH1, NRAS]
GO:1901532	regulation of hematopoietic progenitor cell differentiation	GO_BiologicalProcess-EBI-UniProt-GOA-ACAP-ARAP_25.05.2022_00h00	1.05924e-05	1.3697e-05	1.05395e-07	1.47552e-07	[4, 5, 6, 7, 8, 9]	Group2	7.5	3	[ABL1, CDK6, NOTCH1]
GO:1901532	regulation of hematopoietic progenitor cell differentiation	GO_BiologicalProcess-EBI-UniProt-GOA-ACAP-ARAP_25.05.2022_00h00	1.05924e-05	1.3697e-05	1.21127e-10	4.23944e-10	[4, 5, 6, 7, 8, 9]	Group3	7.5	3	[ABL1, CDK6, NOTCH1]
GO:1901532	regulation of hematopoietic progenitor cell differentiation	GO_BiologicalProcess-EBI-UniProt-GOA-ACAP-ARAP_25.05.2022_00h00	1.05924e-05	1.3697e-05	4.31144e-07	5.03001e-07	[4, 5, 6, 7, 8, 9]	Group4	7.5	3	[ABL1, CDK6, NOTCH1]
GO:0014002	astrocyte development	GO_BiologicalProcess-EBI-UniProt-GOA-ACAP-ARAP_25.05.2022_00h00	1.62069e-05	2.0602e-05	3.95717e-08	6.92505e-08	[5, 6, 7, 8, 9, 10]	Group5	6.52174	3	[CDK6, KRAS, NRAS]
GO:0014002	astrocyte development	GO_BiologicalProcess-EBI-UniProt-GOA-ACAP-ARAP_25.05.2022_00h00	1.62069e-05	2.0602e-05	1.25129e-13	8.75906e-13	[5, 6, 7, 8, 9, 10]	Group6	6.52174	3	[CDK6, KRAS, NRAS]
GO:0045668	negative regulation of osteoblast differentiation	GO_BiologicalProcess-EBI-UniProt-GOA-ACAP-ARAP_25.05.2022_00h00	1.84405e-05	2.30506e-05	1.21127e-10	4.23944e-10	[4, 5, 6]	Group3	6.25	3	[CDK6, NOTCH1, SMAD3]
GO:0045668	negative regulation of osteoblast differentiation	GO_BiologicalProcess-EBI-UniProt-GOA-ACAP-ARAP_25.05.2022_00h00	1.84405e-05	2.30506e-05	4.31144e-07	5.03001e-07	[4, 5, 6]	Group4	6.25	3	[CDK6, NOTCH1, SMAD3]
GO:2000772	regulation of cellular senescence	GO_BiologicalProcess-EBI-UniProt-GOA-ACAP-ARAP_25.05.2022_00h00	2.0868e-05	2.56573e-05	1.05395e-07	1.47552e-07	[4, 5]	Group2	6	3	[ABL1, CDK6, SIRT1]
GO:2000772	regulation of cellular senescence	GO_BiologicalProcess-EBI-UniProt-GOA-ACAP-ARAP_25.05.2022_00h00	2.0868e-05	2.56573e-05	1.21127e-10	4.23944e-10	[4, 5]	Group3	6	3	[ABL1, CDK6, SIRT1]
GO:0010718	positive regulation of epithelial to mesenchymal transition	GO_BiologicalProcess-EBI-UniProt-GOA-ACAP-ARAP_25.05.2022_00h00	2.34971e-05	2.84239e-05	4.31144e-07	5.03001e-07	[3, 4, 5, 6, 7, 8]	Group4	5.76923	3	[NOTCH1, SMAD3, SMAD4]
GO:0048538	thymus development	GO_BiologicalProcess-EBI-UniProt-GOA-ACAP-ARAP_25.05.2022_00h00	2.34971e-05	2.84239e-05	1.25129e-13	8.75906e-13	[4, 5, 6, 7]	Group6	5.76923	3	[ABL1, MAP2K1, MAPK1]
GO:0030857	negative regulation of epithelial cell differentiation	GO_BiologicalProcess-EBI-UniProt-GOA-ACAP-ARAP_25.05.2022_00h00	2.48896e-05	2.96305e-05	3.95717e-08	6.92505e-08	[4, 5, 6, 7]	Group5	5.66038	3	[KRAS, NOTCH1, NRAS]
GO:0030857	negative regulation of epithelial cell differentiation	GO_BiologicalProcess-EBI-UniProt-GOA-ACAP-ARAP_25.05.2022_00h00	2.48896e-05	2.96305e-05	1.25129e-13	8.75906e-13	[4, 5, 6, 7]	Group6	5.66038	3	[KRAS, NOTCH1, NRAS]
GO:0014009	glial cell proliferation	GO_BiologicalProcess-EBI-UniProt-GOA-ACAP-ARAP_25.05.2022_00h00	3.1002e-05	3.63305e-05	3.95717e-08	6.92505e-08	[3, 6, 7, 8]	Group5	5.26316	3	[KRAS, NOTCH1, NRAS]
GO:0014009	glial cell proliferation	GO_BiologicalProcess-EBI-UniProt-GOA-ACAP-ARAP_25.05.2022_00h00	3.1002e-05	3.63305e-05	1.25129e-13	8.75906e-13	[3, 6, 7, 8]	Group6	5.26316	3	[KRAS, NOTCH1, NRAS]
GO:0010611	regulation of cardiac muscle hypertrophy	GO_BiologicalProcess-EBI-UniProt-GOA-ACAP-ARAP_25.05.2022_00h00	3.26703e-05	3.76966e-05	4.31144e-07	5.03001e-07	[4, 5, 6, 7]	Group4	5.17241	3	[NOTCH1, SMAD3, SMAD4]
GO:0043536	positive regulation of blood vessel endothelial cell migration	GO_BiologicalProcess-EBI-UniProt-GOA-ACAP-ARAP_25.05.2022_00h00	3.43967e-05	3.90871e-05	1.05395e-07	1.47552e-07	[6, 7, 8, 9]	Group2	5.08475	3	[ABL1, PLCG1, SIRT1]
GO:1903053	regulation of extracellular matrix organization	GO_BiologicalProcess-EBI-UniProt-GOA-ACAP-ARAP_25.05.2022_00h00	3.61819e-05	4.05022e-05	1.21127e-10	4.23944e-10	[4, 5, 6]	Group3	5	3	[ABL1, NOTCH1, SMAD3]
GO:1903053	regulation of extracellular matrix organization	GO_BiologicalProcess-EBI-UniProt-GOA-ACAP-ARAP_25.05.2022_00h00	3.61819e-05	4.05022e-05	4.31144e-07	5.03001e-07	[4, 5, 6]	Group4	5	3	[ABL1, NOTCH1, SMAD3]
GO:0001954	positive regulation of cell-matrix adhesion	GO_BiologicalProcess-EBI-UniProt-GOA-ACAP-ARAP_25.05.2022_00h00	3.8027e-05	4.19416e-05	1.05395e-07	1.47552e-07	[5, 6, 7]	Group2	4.91803	3	[ABL1, CDK6, SMAD3]
GO:0001954	positive regulation of cell-matrix adhesion	GO_BiologicalProcess-EBI-UniProt-GOA-ACAP-ARAP_25.05.2022_00h00	3.8027e-05	4.19416e-05	1.21127e-10	4.23944e-10	[5, 6, 7]	Group3	4.91803	3	[ABL1, CDK6, SMAD3]
GO:0072132	mesenchyme morphogenesis	GO_BiologicalProcess-EBI-UniProt-GOA-ACAP-ARAP_25.05.2022_00h00	3.8027e-05	4.19416e-05	4.31144e-07	5.03001e-07	[4, 5]	Group4	4.91803	3	[NOTCH1, SMAD3, SMAD4]
GO:0014743	regulation of muscle hypertrophy	GO_BiologicalProcess-EBI-UniProt-GOA-ACAP-ARAP_25.05.2022_00h00	3.8027e-05	4.19416e-05	4.31144e-07	5.03001e-07	[5, 6]	Group4	4.91803	3	[NOTCH1, SMAD3, SMAD4]
GO:0001954	positive regulation of cell-matrix adhesion	GO_BiologicalProcess-EBI-UniProt-GOA-ACAP-ARAP_25.05.2022_00h00	3.8027e-05	4.19416e-05	4.31144e-07	5.03001e-07	[5, 6, 7]	Group4	4.91803	3	[ABL1, CDK6, SMAD3]
KEGG:04213	Longevity regulating pathway	KEGG_25.05.2022	3.99329e-05	4.34053e-05	3.95717e-08	6.92505e-08	[-1]	Group5	4.83871	3	[KRAS, NRAS, SIRT1]
GO:0051438	regulation of ubiquitin-protein transferase activity	GO_BiologicalProcess-EBI-UniProt-GOA-ACAP-ARAP_25.05.2022_00h00	4.39307e-05	4.70686e-05	2.79078e-06	2.79078e-06	[5, 9, 10]	Group1	4.6875	3	[ABL1, BTRC, SKP1]
GO:0001756	somitogenesis	GO_BiologicalProcess-EBI-UniProt-GOA-ACAP-ARAP_25.05.2022_00h00	5.26961e-05	5.56649e-05	4.31144e-07	5.03001e-07	[3, 4, 5, 6, 7]	Group4	4.41176	3	[NOTCH1, SMAD3, SMAD4]
GO:0014015	positive regulation of gliogenesis	GO_BiologicalProcess-EBI-UniProt-GOA-ACAP-ARAP_25.05.2022_00h00	5.74784e-05	5.98733e-05	3.95717e-08	6.92505e-08	[5, 6, 7, 8, 9]	Group5	4.28571	3	[KRAS, NOTCH1, NRAS]
GO:0014015	positive regulation of gliogenesis	GO_BiologicalProcess-EBI-UniProt-GOA-ACAP-ARAP_25.05.2022_00h00	5.74784e-05	5.98733e-05	1.25129e-13	8.75906e-13	[5, 6, 7, 8, 9]	Group6	4.28571	3	[KRAS, NOTCH1, NRAS]
GO:0090109	regulation of cell-substrate junction assembly	GO_BiologicalProcess-EBI-UniProt-GOA-ACAP-ARAP_25.05.2022_00h00	6.25367e-05	6.425e-05	1.21127e-10	4.23944e-10	[5, 6, 7]	Group3	4.16667	3	[ABL1, SMAD3, VCL]
GO:0051893	regulation of focal adhesion assembly	GO_BiologicalProcess-EBI-UniProt-GOA-ACAP-ARAP_25.05.2022_00h00	6.25367e-05	6.425e-05	1.21127e-10	4.23944e-10	[6, 7, 8]	Group3	4.16667	3	[ABL1, SMAD3, VCL]
GO:0090109	regulation of cell-substrate junction assembly	GO_BiologicalProcess-EBI-UniProt-GOA-ACAP-ARAP_25.05.2022_00h00	6.25367e-05	6.425e-05	4.31144e-07	5.03001e-07	[5, 6, 7]	Group4	4.16667	3	[ABL1, SMAD3, VCL]
GO:0051893	regulation of focal adhesion assembly	GO_BiologicalProcess-EBI-UniProt-GOA-ACAP-ARAP_25.05.2022_00h00	6.25367e-05	6.425e-05	4.31144e-07	5.03001e-07	[6, 7, 8]	Group4	4.16667	3	[ABL1, SMAD3, VCL]
GO:0046579	positive regulation of Ras protein signal transduction	GO_BiologicalProcess-EBI-UniProt-GOA-ACAP-ARAP_25.05.2022_00h00	6.51716e-05	6.60523e-05	3.95717e-08	6.92505e-08	[6, 7, 8, 9]	Group5	4.10959	3	[KRAS, NOTCH1, NRAS]
GO:0046579	positive regulation of Ras protein signal transduction	GO_BiologicalProcess-EBI-UniProt-GOA-ACAP-ARAP_25.05.2022_00h00	6.51716e-05	6.60523e-05	1.25129e-13	8.75906e-13	[6, 7, 8, 9]	Group6	4.10959	3	[KRAS, NOTCH1, NRAS]
GO:0035914	skeletal muscle cell differentiation	GO_BiologicalProcess-EBI-UniProt-GOA-ACAP-ARAP_25.05.2022_00h00	7.06575e-05	7.06575e-05	3.95717e-08	6.92505e-08	[4, 6, 7]	Group5	4	3	[KRAS, NOTCH1, NRAS]
GO:0048645	animal organ formation	GO_BiologicalProcess-EBI-UniProt-GOA-ACAP-ARAP_25.05.2022_00h00	7.06575e-05	7.06575e-05	1.25129e-13	8.75906e-13	[3, 4, 5]	Group6	4	3	[MAP2K1, MAPK1, NOTCH1]
GO:0035914	skeletal muscle cell differentiation	GO_BiologicalProcess-EBI-UniProt-GOA-ACAP-ARAP_25.05.2022_00h00	7.06575e-05	7.06575e-05	1.25129e-13	8.75906e-13	[4, 6, 7]	Group6	4	3	[KRAS, NOTCH1, NRAS]

## Sheet: Sheet3
miRNA Target Genes
miRNA	Genes
hsa-miR-196a-5p	ACTB, MAPK1, VCL, ABL1, NRAS
hsa-miR-143-3p	SMAD3, MAPK1, KRAS, HNF4A, CDK1, SKP1
has-miR-145-5p	SMAD4, SMAD3, CDK6, ACTB, NRAS, SKP1
has-miR-34c-5p	MAP2K1, CDK6, NOTCH1, HNF4A, SIRT1, SMAD4, PLCG1, VCL
has-miR-675-3p	SKP1, BTRC, CREB1, CDK1, CDK6, MAPK1, SMAD4, SMAD3
has-miR-708-5p
has-miR-145-3p	CREB1, CDK1, CDK6, SMAD4, MAPK1
has-miR-199b-5p	SIRT1, BTRC, KRAS1
