# Supplementary material for: RNA sequencing-based profiling of differentially expressed microRNAs in endothelial cells from offspring of hypertensive pregnancies: a preliminary study
Source: Front Mol Biosci. 2025 Jul 21;12:1520101. doi: 10.3389/fmolb.2025.1520101 (PMC12391922; doi:10.3389/fmolb.2025.1520101)
Supplement: Supplementary file 2 [file DataSheet4.xlsx]

## Sheet: KEGG Pathway
Category	Term	Count	%	Pvalue	Genes	List Total	Pop Hits	Pop Total	Fold Enrichment	Bonferroni	Benjamini	FDR
KEGG_PATHWAY	hsa04218:Cellular senescence	22	3.02198	2.38083e-07	MAP2K1, SMAD3, NFATC2, NFATC1, CACNA1D, ETS1, SIRT1, CDC25A, HIPK2, PPP3CA, NRAS, CDK6, CCNE2, RRAS, RASSF5, CDK1, MAPK1, KRAS, E2F3, SLC25A31, BTRC, E2F5	320	156	8662	3.81739	6.61848e-05	6.6187e-05	5.35686e-05
KEGG_PATHWAY	hsa05214:Glioma	13	1.78571	1.6421e-05	PDGFRA, MAP2K1, CAMK2D, CAMK1D, IGF1R, NRAS, CDK6, CAMK4, MAPK1, KRAS, E2F3, PLCG1, SOS2	320	75	8662	4.69192	0.00455466	0.00228251	0.00184736
KEGG_PATHWAY	hsa04310:Wnt signaling pathway	19	2.60989	6.96661e-05	CAMK2D, SMAD4, SMAD3, FZD4, CTNNBIP1, LEF1, NFATC2, NFATC1, CACYBP, PRICKLE1, SENP2, SIRT1, PPP3CA, DAAM1, TBL1XR1, RSPO1, BTRC, RSPO4, SKP1	320	174	8662	2.95578	0.0191815	0.00645573	0.00522496
KEGG_PATHWAY	hsa04520:Adherens junction	13	1.78571	0.000144602	SMAD4, YES1, SMAD3, LEF1, PTPRM, ACTB, IGF1R, RAP1B, FER, MAPK1, WASF1, MET, VCL	320	93	8662	3.7838	0.0394048	0.00882244	0.00714046
KEGG_PATHWAY	hsa04014:Ras signaling pathway	22	3.02198	0.000158677	PDGFRA, MAP2K1, ANGPT2, STK4, FGF1, ETS1, RASGRP1, IGF1R, RAP1B, NRAS, RRAS, RASSF5, ABL1, MAPK1, ABL2, PLCE1, SHOC2, KRAS, PLCG1, RGL2, MET, SOS2	320	236	8662	2.52336	0.0431567	0.00882244	0.00714046
KEGG_PATHWAY	hsa05215:Prostate cancer	13	1.78571	0.000216914	PDGFRA, MAP2K1, LEF1, IGF1R, NRAS, CREB1, CCNE2, MAPK1, KRAS, E2F3, ERG, SOS2, CREB5	320	97	8662	3.62777	0.0585261	0.0100504	0.00813428
KEGG_PATHWAY	hsa05223:Non-small cell lung cancer	11	1.51099	0.000280779	MAP2K1, NRAS, CDK6, RASSF5, MAPK1, KRAS, E2F3, PLCG1, STK4, MET, SOS2	320	72	8662	4.1355	0.0750981	0.0102061	0.00826034
KEGG_PATHWAY	hsa04010:MAPK signaling pathway	25	3.43407	0.000293701	CACNA1A, CACNA1D, STK4, FGF1, CACNA1E, RASGRP1, IGF1R, RAP1B, PPP3CA, NRAS, RRAS, MAPK1, FLNB, PDGFRA, MAP2K1, MEF2C, ANGPT2, MAP3K1, NFATC1, PPM1A, TAOK1, KRAS, MAPT, MET, SOS2	320	301	8662	2.24824	0.0784155	0.0102061	0.00826034
KEGG_PATHWAY	hsa05205:Proteoglycans in cancer	19	2.60989	0.000545544	MAP2K1, CAMK2D, ARHGEF12, FZD4, FRS2, ANK2, ANK3, ACTB, IGF1R, NRAS, COL1A2, RRAS, MAPK1, PLCE1, KRAS, FLNB, PLCG1, MET, SOS2	320	205	8662	2.50881	0.140756	0.0151848	0.0122899
KEGG_PATHWAY	hsa04934:Cushing syndrome	16	2.1978	0.000572088	MAP2K1, CAMK2D, FZD4, LEF1, KCNA4, CACNA1D, PBX1, RAP1B, CREB1, CDK6, CCNE2, RBBP5, MAPK1, E2F3, KCNK3, CREB5	320	155	8662	2.79419	0.147077	0.0151848	0.0122899
KEGG_PATHWAY	hsa01521:EGFR tyrosine kinase inhibitor resistance	11	1.51099	0.000600838	PDGFRA, MAP2K1, NRAS, AXL, MAPK1, KRAS, PLCG1, IL6R, MET, SOS2, IGF1R	320	79	8662	3.76907	0.153871	0.0151848	0.0122899
KEGG_PATHWAY	hsa04015:Rap1 signaling pathway	19	2.60989	0.000726229	PDGFRA, MAP2K1, ANGPT2, MAGI2, FGF1, ACTB, IGF1R, RAP1B, NRAS, RRAS, PRKD3, RASSF5, MAPK1, PLCE1, KRAS, TLN2, PRKD1, PLCG1, MET	320	210	8662	2.44908	0.182877	0.0168243	0.0136168
KEGG_PATHWAY	hsa05161:Hepatitis B	16	2.1978	0.000907758	MAP2K1, SMAD4, MAP3K1, DDX3X, SMAD3, NFATC2, NFATC1, NRAS, CREB1, CCNE2, TRAF3, MAPK1, KRAS, E2F3, SOS2, CREB5	320	162	8662	2.67346	0.223122	0.0194121	0.0157112
KEGG_PATHWAY	hsa05218:Melanoma	10	1.37363	0.0012271	PDGFRA, MAP2K1, NRAS, CDK6, MAPK1, KRAS, E2F3, FGF1, MET, IGF1R	320	72	8662	3.75955	0.289186	0.022567	0.0182647
KEGG_PATHWAY	hsa05225:Hepatocellular carcinoma	16	2.1978	0.00131601	MAP2K1, SMARCC1, SMAD4, SMAD3, FZD4, LEF1, ACTB, IGF1R, NRAS, CDK6, MAPK1, KRAS, E2F3, PLCG1, MET, SOS2	320	168	8662	2.57798	0.306561	0.022567	0.0182647
KEGG_PATHWAY	hsa04710:Circadian rhythm	7	0.961538	0.00133736	PER2, CREB1, RORA, RORB, BTRC, CLOCK, SKP1	320	34	8662	5.57298	0.31067	0.022567	0.0182647
KEGG_PATHWAY	hsa05166:Human T-cell leukemia virus 1 infection	19	2.60989	0.00138	MAP2K1, SMAD4, MAP3K1, SMAD3, CRTC1, NFATC2, NFATC1, ETS1, PPP3CA, NRAS, CREB1, CCNE2, TBPL1, MAPK1, KRAS, E2F3, TLN2, SLC25A31, CREB5	320	222	8662	2.31669	0.318803	0.022567	0.0182647
KEGG_PATHWAY	hsa05220:Chronic myeloid leukemia	10	1.37363	0.00180624	MAP2K1, SMAD4, NRAS, SMAD3, CDK6, ABL1, MAPK1, KRAS, E2F3, SOS2	320	76	8662	3.56168	0.395038	0.0278964	0.0225781
KEGG_PATHWAY	hsa04360:Axon guidance	16	2.1978	0.00289555	NTNG1, CAMK2D, EPHA7, ARHGEF12, NFATC2, PPP3CA, NRAS, RRAS, PLXNA2, ABL1, MAPK1, KRAS, LRIG2, PLCG1, MET, SRGAP1	320	182	8662	2.37967	0.553418	0.0398957	0.0322897
KEGG_PATHWAY	hsa04725:Cholinergic synapse	12	1.64835	0.00290211	CAMK2D, MAP2K1, NRAS, CREB1, CAMK4, KCNQ3, CACNA1A, MAPK1, KRAS, CACNA1D, KCNQ5, CREB5	320	113	8662	2.87456	0.554233	0.0398957	0.0322897
KEGG_PATHWAY	hsa05231:Choline metabolism in cancer	11	1.51099	0.00315721	PDGFRA, MAP2K1, NRAS, SLC44A1, MAPK1, KRAS, PLCG1, WASF1, DGKZ, SOS2, DGKH	320	98	8662	3.03833	0.584841	0.0398957	0.0322897
KEGG_PATHWAY	hsa04925:Aldosterone synthesis and secretion	11	1.51099	0.00315721	NR4A2, CAMK2D, CREB1, CAMK1D, PRKD3, PRKCE, CAMK4, CACNA1D, PRKD1, KCNK3, CREB5	320	98	8662	3.03833	0.584841	0.0398957	0.0322897
KEGG_PATHWAY	hsa04933:AGE-RAGE signaling pathway in diabetic complications	11	1.51099	0.00365831	COL3A1, SMAD4, NRAS, SMAD3, COL1A2, PRKCE, MAPK1, PLCE1, NFATC1, KRAS, PLCG1	320	100	8662	2.97756	0.639	0.0442179	0.0357878
KEGG_PATHWAY	hsa04722:Neurotrophin signaling pathway	12	1.64835	0.00433132	RAP1B, CAMK2D, MAP2K1, NRAS, MAP3K1, CAMK4, ABL1, MAPK1, FRS2, KRAS, PLCG1, SOS2	320	119	8662	2.72962	0.700823	0.0501711	0.0406061
KEGG_PATHWAY	hsa04350:TGF-beta signaling pathway	11	1.51099	0.00632473	SMAD4, TGIF2, SMAD3, IGSF1, MAPK1, E2F5, SMAD5, ACVR2B, THSD4, BMPR1A, SKP1	320	108	8662	2.757	0.828618	0.070331	0.0569225
KEGG_PATHWAY	hsa05200:Pathways in cancer	32	4.3956	0.00711372	CAMK2D, NOTCH1, LEF1, STK4, FGF1, ETS1, RASGRP1, DLL1, IGF1R, NRAS, RASSF5, ABL1, MAPK1, E2F3, PLCG1, IL6R, SKP1, PDGFRA, MAP2K1, SMAD4, ARHGEF12, SMAD3, TPM3, FZD4, LAMB4, CDK6, CCNE2, TRAF3, KRAS, ITGA6, MET, SOS2	320	531	8662	1.63126	0.862576	0.0760621	0.061561
KEGG_PATHWAY	hsa05224:Breast cancer	13	1.78571	0.00794239	MAP2K1, NOTCH1, FZD4, LEF1, FGF1, DLL1, IGF1R, NRAS, CDK6, MAPK1, KRAS, E2F3, SOS2	320	147	8662	2.39384	0.891043	0.0817772	0.0661866
KEGG_PATHWAY	hsa05226:Gastric cancer	13	1.78571	0.00880869	MAP2K1, SMAD4, SMAD3, FZD4, LEF1, FGF1, NRAS, CCNE2, MAPK1, KRAS, E2F3, MET, SOS2	320	149	8662	2.3617	0.914536	0.0851171	0.0688897
KEGG_PATHWAY	hsa05163:Human cytomegalovirus infection	17	2.33516	0.00887912	PDGFRA, MAP2K1, ARHGEF12, NFATC2, NFATC1, TAPBP, AKAP13, PPP3CA, NRAS, CREB1, CDK6, MAPK1, KRAS, E2F3, IL6R, SOS2, CREB5	320	225	8662	2.04519	0.916208	0.0851171	0.0688897
KEGG_PATHWAY	hsa05206:MicroRNAs in cancer	21	2.88462	0.010458	PDGFRA, MAP2K1, ABCC1, NOTCH1, PRKCE, SIRT1, CDC25A, FOXP1, NRAS, CDK6, MMP16, CCNE2, IGF2BP1, ABL1, MAPK1, MDM4, KRAS, E2F3, PLCG1, MET, SOS2	320	310	8662	1.83369	0.946209	0.0951784	0.0770329
KEGG_PATHWAY	hsa05216:Thyroid cancer	6	0.824176	0.0108707	MAP2K1, NRAS, TPM3, LEF1, MAPK1, KRAS	320	37	8662	4.38953	0.952098	0.0951784	0.0770329
KEGG_PATHWAY	hsa04720:Long-term potentiation	8	1.0989	0.0112641	RAP1B, PPP3CA, CAMK2D, MAP2K1, NRAS, CAMK4, MAPK1, KRAS	320	67	8662	3.23209	0.957113	0.0951784	0.0770329
KEGG_PATHWAY	hsa04921:Oxytocin signaling pathway	13	1.78571	0.0112982	MAP2K1, MEF2C, CAMK2D, CAMK1D, NFATC2, NFATC1, CACNA1D, ACTB, PPP3CA, NRAS, CAMK4, MAPK1, KRAS	320	154	8662	2.28502	0.957522	0.0951784	0.0770329
KEGG_PATHWAY	hsa04662:B cell receptor signaling pathway	9	1.23626	0.0118994	PPP3CA, CR2, MAP2K1, NRAS, NFATC2, MAPK1, NFATC1, KRAS, SOS2	320	84	8662	2.90022	0.964131	0.0972954	0.0787463
KEGG_PATHWAY	hsa04012:ErbB signaling pathway	9	1.23626	0.0127293	CAMK2D, MAP2K1, NRAS, ABL1, MAPK1, ABL2, KRAS, PLCG1, SOS2	320	85	8662	2.8661	0.971603	0.101107	0.0818312
KEGG_PATHWAY	hsa05211:Renal cell carcinoma	8	1.0989	0.0131336	RAP1B, MAP2K1, NRAS, MAPK1, KRAS, ETS1, MET, SOS2	320	69	8662	3.13841	0.974659	0.10142	0.0820848
KEGG_PATHWAY	hsa04660:T cell receptor signaling pathway	11	1.51099	0.0136188	PPP3CA, MAP2K1, NRAS, NFATC2, MAPK1, NFATC1, KRAS, PPP2R3A, PLCG1, RASGRP1, SOS2	320	121	8662	2.4608	0.977897	0.102325	0.082817
KEGG_PATHWAY	hsa04550:Signaling pathways regulating pluripotency of stem cells	12	1.64835	0.0163374	MAP2K1, SMAD4, NRAS, SMAD3, FZD4, MAPK1, KRAS, KLF4, SMAD5, ACVR2B, BMPR1A, IGF1R	320	143	8662	2.2715	0.989738	0.11745	0.0950589
KEGG_PATHWAY	hsa05235:PD-L1 expression and PD-1 checkpoint pathway in cancer	9	1.23626	0.0164769	PPP3CA, MAP2K1, NRAS, NFATC2, MAPK1, NFATC1, KRAS, PLCG1, RASGRP1	320	89	8662	2.73729	0.990135	0.11745	0.0950589
KEGG_PATHWAY	hsa04510:Focal adhesion	15	2.06044	0.0177397	PDGFRA, MAP2K1, LAMB4, ACTB, IGF1R, RAP1B, COL1A2, ITGB8, MAPK1, ITGA6, FLNB, TLN2, MET, SOS2, VCL	320	203	8662	2.00015	0.993098	0.123291	0.0997857
KEGG_PATHWAY	hsa04072:Phospholipase D signaling pathway	12	1.64835	0.0205826	CYTH2, PDGFRA, MAP2K1, NRAS, GRM7, RRAS, MAPK1, KRAS, PLCG1, DGKZ, SOS2, DGKH	320	148	8662	2.19476	0.996916	0.137857	0.111575
KEGG_PATHWAY	hsa04370:VEGF signaling pathway	7	0.961538	0.0208274	PPP3CA, MAP2K1, NRAS, NFATC2, MAPK1, KRAS, PLCG1	320	59	8662	3.21155	0.997123	0.137857	0.111575
KEGG_PATHWAY	hsa04810:Regulation of actin cytoskeleton	16	2.1978	0.0219459	PDGFRA, MAP2K1, ARHGEF12, FGF1, ACTB, NRAS, RRAS, ITGB8, MYH9, MAPK1, KRAS, ITGA6, WASF1, SOS2, GIT1, VCL	320	229	8662	1.89127	0.997906	0.141883	0.114833
KEGG_PATHWAY	hsa04068:FoxO signaling pathway	11	1.51099	0.0225593	MAP2K1, SMAD4, NRAS, GABARAPL1, SMAD3, MAPK1, KRAS, STK4, SIRT1, SOS2, IGF1R	320	131	8662	2.27295	0.998242	0.142534	0.11536
KEGG_PATHWAY	hsa04151:PI3K-Akt signaling pathway	22	3.02198	0.024124	PDGFRA, MAP2K1, ANGPT2, MAGI2, LAMB4, PPP2R3A, FGF1, PRLR, IGF1R, NRAS, CREB1, CDK6, COL1A2, CCNE2, ITGB8, MAPK1, KRAS, ITGA6, MET, IL6R, SOS2, CREB5	320	359	8662	1.65881	0.998874	0.149033	0.12062
KEGG_PATHWAY	hsa05167:Kaposi sarcoma-associated herpesvirus infection	14	1.92308	0.0268948	MAP2K1, ANGPT2, LEF1, NFATC2, NFATC1, PPP3CA, NRAS, CREB1, CDK6, TRAF3, MAPK1, KRAS, E2F3, PLCG1	320	194	8662	1.95341	0.999489	0.162538	0.131551
KEGG_PATHWAY	hsa01522:Endocrine resistance	9	1.23626	0.0277087	MAP2K1, NRAS, NOTCH1, MAPK1, KRAS, E2F3, DLL1, SOS2, IGF1R	320	98	8662	2.48591	0.999595	0.163894	0.132648
KEGG_PATHWAY	hsa04150:mTOR signaling pathway	12	1.64835	0.0289922	ATP6V1A, MAP2K1, CLIP1, NRAS, RRAGC, FZD4, GRB10, MAPK1, KRAS, RICTOR, SOS2, IGF1R	320	156	8662	2.08221	0.99972	0.164486	0.133128
KEGG_PATHWAY	hsa04148:Efferocytosis	12	1.64835	0.0289922	CAMK2D, MAP2K1, CREB1, AXL, NFATC2, ADAM10, MAPK1, ATP11C, NFATC1, CD47, SIRT1, PBX1	320	156	8662	2.08221	0.99972	0.164486	0.133128
KEGG_PATHWAY	hsa04371:Apelin signaling pathway	11	1.51099	0.0323064	MEF2C, MAP2K1, SMAD4, NRAS, SMAD3, RRAS, PRKCE, CAMK4, MAPK1, KRAS, PPARGC1A	320	139	8662	2.14213	0.999892	0.178347	0.144345
KEGG_PATHWAY	hsa04935:Growth hormone synthesis, secretion and action	10	1.37363	0.0327183	MAP2K1, NRAS, MAP3K1, CREB1, MAPK1, KRAS, CACNA1D, PLCG1, SOS2, CREB5	320	120	8662	2.25573	0.999904	0.178347	0.144345
KEGG_PATHWAY	hsa05221:Acute myeloid leukemia	7	0.961538	0.0362217	PER2, MAP2K1, NRAS, LEF1, MAPK1, KRAS, SOS2	320	67	8662	2.82808	0.999965	0.193333	0.156474
KEGG_PATHWAY	hsa05165:Human papillomavirus infection	20	2.74725	0.0368584	ATP6V1A, MAP2K1, NOTCH1, FZD4, LAMB4, PPP2R3A, NRAS, CREB1, CDK6, COL1A2, DLG3, CCNE2, TRAF3, TBPL1, ITGB8, MAPK1, KRAS, ITGA6, SOS2, CREB5	320	331	8662	1.63557	0.999971	0.193333	0.156474
KEGG_PATHWAY	hsa05210:Colorectal cancer	8	1.0989	0.0387341	MAP2K1, SMAD4, NRAS, SMAD3, LEF1, MAPK1, KRAS, SOS2	320	86	8662	2.51802	0.999983	0.199409	0.161392
KEGG_PATHWAY	hsa05031:Amphetamine addiction	7	0.961538	0.0409695	PPP3CA, CAMK2D, CREB1, CAMK4, CACNA1D, SIRT1, CREB5	320	69	8662	2.74611	0.999991	0.201936	0.163437
KEGG_PATHWAY	hsa04140:Autophagy - animal	12	1.64835	0.0411233	MAP2K1, NRAS, GABARAPL1, MTMR3, RRAGC, RRAS, ATG4B, MAPK1, KRAS, ZFYVE1, IGF1R, ATG2B	320	165	8662	1.96864	0.999991	0.201936	0.163437
KEGG_PATHWAY	hsa04928:Parathyroid hormone synthesis, secretion and action	9	1.23626	0.041404	NR4A2, AKAP13, MEF2C, MAP2K1, CREB1, MMP16, PDE4D, MAPK1, CREB5	320	106	8662	2.29829	0.999992	0.201936	0.163437
KEGG_PATHWAY	hsa04540:Gap junction	8	1.0989	0.0430466	PDGFRA, MAP2K1, NRAS, CDK1, MAPK1, HTR2C, KRAS, SOS2	320	88	8662	2.4608	0.999995	0.206327	0.166991
KEGG_PATHWAY	hsa00510:N-Glycan biosynthesis	6	0.824176	0.0445936	FUT8, GANAB, ALG9, MGAT4A, MGAT3, MOGS	320	53	8662	3.06439	0.999997	0.207015	0.167548
KEGG_PATHWAY	hsa04211:Longevity regulating pathway	8	1.0989	0.0453147	NRAS, CREB1, CAMK4, KRAS, SIRT1, PPARGC1A, CREB5, IGF1R	320	89	8662	2.43315	0.999997	0.207015	0.167548
KEGG_PATHWAY	hsa04659:Th17 cell differentiation	9	1.23626	0.0454241	PPP3CA, SMAD4, SMAD3, NFATC2, MAPK1, NFATC1, RORA, PLCG1, IL6R	320	108	8662	2.25573	0.999998	0.207015	0.167548
KEGG_PATHWAY	hsa04020:Calcium signaling pathway	16	2.1978	0.0468169	PDGFRA, CAMK2D, CAMK1D, NFATC2, CACNA1A, HTR2C, NFATC1, CACNA1D, FGF1, CACNA1E, PPP3CA, CAMK4, PLCE1, SLC25A31, PLCG1, MET	320	253	8662	1.71186	0.999998	0.209921	0.1699
KEGG_PATHWAY	hsa05170:Human immunodeficiency virus 1 infection	14	1.92308	0.0494933	MAP2K1, AP1B1, NFATC2, NFATC1, TAPBP, PPP3CA, NRAS, AP1G1, CDK1, MAPK1, KRAS, PLCG1, BTRC, SKP1	320	212	8662	1.78756	0.999999	0.218399	0.176762
KEGG_PATHWAY	hsa04114:Oocyte meiosis	10	1.37363	0.0523889	PPP3CA, CAMK2D, MAP2K1, CCNE2, CDK1, MAPK1, CPEB3, BTRC, SKP1, IGF1R	320	131	8662	2.06632	1	0.222571	0.180139
KEGG_PATHWAY	hsa04658:Th1 and Th2 cell differentiation	8	1.0989	0.052574	PPP3CA, NOTCH1, MAF, NFATC2, MAPK1, NFATC1, PLCG1, DLL1	320	92	8662	2.3538	1	0.222571	0.180139
KEGG_PATHWAY	hsa05202:Transcriptional misregulation in cancer	13	1.78571	0.0528407	MEF2C, MLLT3, AFF1, PBX1, IGF1R, PER2, FUT8, MYCN, NR4A3, MAF, SIX4, ERG, MET	320	193	8662	1.82328	1	0.222571	0.180139
KEGG_PATHWAY	hsa04912:GnRH signaling pathway	8	1.0989	0.055147	CAMK2D, MAP2K1, NRAS, MAP3K1, MAPK1, KRAS, CACNA1D, SOS2	320	93	8662	2.32849	1	0.228819	0.185195
KEGG_PATHWAY	hsa05212:Pancreatic cancer	7	0.961538	0.0605803	MAP2K1, SMAD4, SMAD3, CDK6, MAPK1, KRAS, E2F3	320	76	8662	2.49317	1	0.244353	0.197768
KEGG_PATHWAY	hsa04724:Glutamatergic synapse	9	1.23626	0.0614741	PPP3CA, GRM7, CACNA1A, MAPK1, CACNA1D, SLC17A8, SLC38A2, SHANK3, LZTS3	320	115	8662	2.11842	1	0.244353	0.197768
KEGG_PATHWAY	hsa05213:Endometrial cancer	6	0.824176	0.0615278	MAP2K1, NRAS, LEF1, MAPK1, KRAS, SOS2	320	58	8662	2.80022	1	0.244353	0.197768
KEGG_PATHWAY	hsa05219:Bladder cancer	5	0.686813	0.062881	MAP2K1, NRAS, MAPK1, KRAS, E2F3	320	41	8662	3.30107	1	0.24621	0.199271
KEGG_PATHWAY	hsa04110:Cell cycle	11	1.51099	0.064261	ORC4, SMAD4, SMAD3, CDK6, CCNE2, CDK1, ABL1, E2F3, E2F5, CDC25A, SKP1	320	157	8662	1.89654	1	0.248119	0.200816
KEGG_PATHWAY	hsa04730:Long-term depression	6	0.824176	0.0691914	MAP2K1, NRAS, CACNA1A, MAPK1, KRAS, IGF1R	320	60	8662	2.70688	1	0.263496	0.213261
KEGG_PATHWAY	hsa04071:Sphingolipid signaling pathway	9	1.23626	0.0777486	MAP2K1, ABCC1, NRAS, CERS6, PRKCE, MAPK1, KRAS, PPP2R3A, SGPP1	320	121	8662	2.01338	1	0.287263	0.232497
KEGG_PATHWAY	hsa04919:Thyroid hormone signaling pathway	9	1.23626	0.0777486	MAP2K1, NRAS, NOTCH1, THRB, MAPK1, PLCE1, KRAS, PLCG1, ACTB	320	121	8662	2.01338	1	0.287263	0.232497
KEGG_PATHWAY	hsa04916:Melanogenesis	8	1.0989	0.0785324	CAMK2D, MAP2K1, NRAS, CREB1, FZD4, LEF1, MAPK1, KRAS	320	101	8662	2.14406	1	0.287263	0.232497
KEGG_PATHWAY	hsa04022:cGMP-PKG signaling pathway	11	1.51099	0.0859824	PPP3CA, MEF2C, MAP2K1, CREB1, PRKCE, NFATC2, MAPK1, NFATC1, CACNA1D, SLC25A31, CREB5	320	166	8662	1.79371	1	0.30659	0.24814
KEGG_PATHWAY	hsa04929:GnRH secretion	6	0.824176	0.0860217	HCN3, MAP2K1, NRAS, MAPK1, KRAS, CACNA1D	320	64	8662	2.5377	1	0.30659	0.24814
KEGG_PATHWAY	hsa04930:Type II diabetes mellitus	5	0.686813	0.0880917	PRKCE, CACNA1A, MAPK1, CACNA1D, CACNA1E	320	46	8662	2.94226	1	0.307849	0.249159
KEGG_PATHWAY	hsa04625:C-type lectin receptor signaling pathway	8	1.0989	0.0885897	PPP3CA, NRAS, ARHGEF12, RRAS, NFATC2, MAPK1, NFATC1, KRAS	320	104	8662	2.08221	1	0.307849	0.249159
KEGG_PATHWAY	hsa04927:Cortisol synthesis and secretion	6	0.824176	0.0905366	CREB1, KCNA4, CACNA1D, KCNK3, PBX1, CREB5	320	65	8662	2.49865	1	0.310731	0.251491
KEGG_PATHWAY	hsa05207:Chemical carcinogenesis - receptor activation	13	1.78571	0.0920918	MAP2K1, CACNA1A, CACNA1D, KLF4, DLL1, CDC25A, NRAS, CREB1, MAPK1, KPNA4, KRAS, SOS2, CREB5	320	212	8662	1.65988	1	0.312214	0.252691
KEGG_PATHWAY	hsa04650:Natural killer cell mediated cytotoxicity	9	1.23626	0.0963745	PPP3CA, MAP2K1, NRAS, NFATC2, MAPK1, NFATC1, KRAS, PLCG1, SOS2	320	127	8662	1.91826	1	0.322796	0.261256

## Sheet: KEGG Pathway (2)
Term	Fold Enrichment	p-value	Count
Cellular senescence	3.81739	2.38083e-07	22
Glioma	4.69192	1.6421e-05	13
Wnt signaling pathway	2.95578	6.96661e-05	19
Adherens junction	3.7838	0.000144602	13
Ras signaling pathway	2.52336	0.000158677	22
Prostate cancer	3.62777	0.000216914	13
Non-small cell lung cancer	4.1355	0.000280779	11
MAPK signaling pathway	2.24824	0.000293701	25
Proteoglycans in cancer	2.50881	0.000545544	19
Cushing syndrome	2.79419	0.000572088	16
EGFR tyrosine kinase inhibitor resistance	3.76907	0.000600838	11
Rap1 signaling pathway	2.44908	0.000726229	19
Hepatitis B	2.67346	0.000907758	16
Melanoma	3.75955	0.0012271	10
Hepatocellular carcinoma	2.57798	0.00131601	16
Circadian rhythm	5.57298	0.00133736	7
Human T-cell leukemia virus 1 infection	2.31669	0.00138	19
Chronic myeloid leukemia	3.56168	0.00180624	10
Axon guidance	2.37967	0.00289555	16
Cholinergic synapse	2.87456	0.00290211	12
