# Supplementary material for: RNA sequencing-based profiling of differentially expressed microRNAs in endothelial cells from offspring of hypertensive pregnancies: a preliminary study
Source: Front Mol Biosci. 2025 Jul 21;12:1520101. doi: 10.3389/fmolb.2025.1520101 (PMC12391922; doi:10.3389/fmolb.2025.1520101)
Supplement: Supplementary file 3 [file DataSheet3.xlsx]

## Sheet: GO Terms
Category	Term	Count	%	PValue	Genes	List Total	Pop Hits	Pop Total	Fold Enrichment	Bonferroni	Benjamini	FDR
GOTERM_MF_DIRECT	GO:0005515~protein binding	563	77.3352	5.16678e-16	CNTFR, ZFYVE1, BACH1, DCAF7, NDST1, SCAMP4, PCMT1, ALCAM, DPYSL4, PPP4R2, GJA5, GPBP1, PLCE1, DIP2A, HOXA7, DDX17, FNBP4, MEF2C, GABARAPL1, PRKCE, ZNF281, SERPINF2, RFX3, FRS2, PDZK1, BCAM, DAAM1, PRKD3, PSME4, TBPL1, FAR1, PRKD1, CLOCK, ZNF275, MTMR3, GATA6, MTMR9, NEDD4L, BAZ2A, GIGYF2, EPB41L5, GJC3, LARP1, EPB41L1, MYO6, PLCG1, PSMF1, ZNF148, HOXC8, PPARGC1A, CDK17, FZD4, ERLIN1, NFATC2, NFAT…	697	12707	18883	1.20034	4.61853e-13	4.30392e-13	4.22642e-13
GOTERM_BP_DIRECT	GO:0045944~positive regulation of transcription from RNA polymerase II promoter	97	13.3242	1.44942e-13	CRTC1, UBP1, ARID4B, RORA, RORB, FGF1, BACH1, ETS1, MCIDAS, GPBP1, POGZ, HOXA7, DDX17, MEF2C, SMARCC1, LMO4, SERPINF2, UBE2E1, RFX3, CASK, SOX11, PYGO1, MYCN, MAF, TBL1XR1, ERG, PRKD1, CLOCK, DLX3, NOTCH1, CBFB, GATA6, ABL1, ZNF304, ZNF148, ZNF544, ZNF268, PPARGC1A, PPARGC1B, SMAD4, POU2F1, YES1, SMAD3, AUTS2, HMGA1, NFATC2, NFATC1, TRERF1, SMAD5, PBX1, FOSL2, NR4A2, NR4A3, AGO1, CDK13, BMPR1A, C…	682	1230	19256	2.22663	4.81384e-10	4.81063e-10	4.79469e-10
GOTERM_CC_DIRECT	GO:0005829~cytosol	271	37.2253	5.15527e-11	GLTP, PANK2, AHCYL2, AHCYL1, DIXDC1, BACH1, ACTB, DCAF7, PCMT1, AS3MT, RASSF2, RASSF3, DPYSL4, PEG10, GPBP1, HABP4, PLCE1, BTRC, TNS3, SKP1, DDX17, MEF2C, GABARAPL1, WSB2, PRKCE, AP1B1, GOLPH3L, FRS2, YOD1, ANK2, ANK3, FNDC3A, RRAGC, DAAM1, PRKD3, PSME4, PRKD1, CLOCK, MTMR3, NEDD4L, MTMR9, BAZ2A, GIGYF2, EPB41L5, LARP1, RNF213, EPB41L1, MYO6, STK38L, TNRC18, PLCG1, PSMF1, ZNF268, PPARGC1A, PPARGC…	712	5537	20521	1.41063	3.02614e-08	3.02614e-08	2.90242e-08
GOTERM_MF_DIRECT	GO:0003700~transcription factor activity, sequence-specific DNA binding	58	7.96703	1.04739e-10	CREBZF, THRB, UBP1, RORA, RORB, BACH1, ETS1, TRPS1, HNF4A, GPBP1, ZNF329, ZNF687, KLF12, MEF2C, TGIF2, ZNF282, ZNF281, EBF1, RFX3, SOX11, PROX1, FOXP1, ELF1, MYCN, CREB1, MAF, ERG, ZNF710, CLOCK, CREB5, DLX3, MYRF, PLAG1, LEF1, GATA6, CREBL2, STOX2, ZNF704, PLAGL2, E2F3, ZNF148, E2F5, ZNF268, SMAD4, SMAD3, FOXJ3, NFATC2, NFATC1, FOXN3, FOXN2, KLF4, SMAD5, PBX1, FOSL2, ZNF618, TEF, NFIC, NFE2L1	697	609	18883	2.58017	8.71426e-08	4.36236e-08	4.28381e-08
GOTERM_CC_DIRECT	GO:0005634~nucleus	288	39.5604	1.08422e-10	PANK2, CCNJ, BACH1, ACTB, DCAF7, RASSF2, MCIDAS, RASSF3, PPP4R2, RASSF5, GPBP1, RAVER2, HABP4, DIP2B, HOXA7, CCNL1, BTRC, ATXN7L3, SKP1, ISY1-RAB43, DDX17, MEF2C, SMARCC1, ZFP1, ZNF282, SFMBT1, PRKCE, ZNF281, ZFP2, EBF1, RFX3, SOX11, RRAGC, PSME4, ZNF710, PRKD1, CLOCK, ZNF275, TSHZ2, GATA6, BAZ2A, MBTD1, ZNF704, MYO6, ZNF268, PPARGC1A, HOXC8, PPARGC1B, CDK17, RCC2, NFATC2, NFATC1, HSPA12A, TRERF1…	712	6021	20521	1.37861	6.36436e-08	3.18218e-08	3.05207e-08
GOTERM_BP_DIRECT	GO:0006357~regulation of transcription from RNA polymerase II promoter	101	13.8736	1.27593e-08	ZNF570, UBP1, ARID4B, RORA, RORB, BACH1, ETS1, ACTB, HOXA7, CCNL1, ATXN7L3, DDX17, SMARCC1, ZFP1, ZFP2, EBF1, RFX3, FOXP1, MYCN, MAF, TBL1XR1, ZNF439, ERG, ZNF710, CLOCK, ZNF275, DLX3, NOTCH1, CBFB, TSHZ2, CREBL2, ATXN7, ZNF704, ZKSCAN8, ZNF547, ZNF304, ZNF148, ZNF544, ZNF268, HOXC8, SMAD4, POU2F1, SMAD3, BRPF3, NFATC2, NFATC1, FOXN3, FOXN2, TRERF1, ZFHX4, SMAD5, PBX1, FOSL2, NR4A2, NR4A3, CDK1, …	682	1599	19256	1.78342	4.23599e-05	2.1174e-05	2.11038e-05
GOTERM_CC_DIRECT	GO:0000785~chromatin	76	10.4396	1.36292e-08	CREBZF, THRB, BNC2, PPP1R10, UBP1, RORA, RORB, BACH1, ETS1, ACTB, PPP4R2, SIX4, TRPS1, HNF4A, POGZ, HOXA7, KLF12, SMARCC1, MYOCD, MEF2C, TGIF2, EBF1, RFX3, SOX11, PROX1, SIRT1, FOXP1, ELF1, MYCN, CREB1, MAF, ELF4, DMRTA1, TFEC, ERG, CHMP7, CLOCK, CREB5, DLX3, ZBTB46, SATB1, SATB2, TSHZ2, GATA6, CREBL2, NSD1, E2F3, MTA2, E2F5, PPARGC1A, HOXC8, HDX, SMAD4, POU2F1, SMAD3, FOXJ3, FOXJ2, HMGA1, NFATC2…	712	1097	20521	1.99676	8.00032e-06	2.66679e-06	2.55775e-06
GOTERM_MF_DIRECT	GO:0003677~DNA binding	88	12.0879	2.08726e-07	CREBZF, RNF11, THRB, DDX3X, PPP1R10, PHF20, HP1BP3, UBP1, ARID4B, RORA, BACH1, ETS1, PHF6, SIX4, ZMYM4, PEG10, HNF4A, GPBP1, ZNF329, POGZ, ZNF687, KLF12, CR2, MEF2C, TGIF2, CERS6, TET2, EBF1, TET1, RFX3, SOX11, ASH1L, PROX1, TSN, HIC2, MYCN, CREB1, MAF, TBPL1, ERG, MAPT, CLOCK, CREB5, GTF2A1, KHDRBS1, DLX3, UHRF2, MYRF, SATB1, SATB2, TSHZ2, LEF1, GATA6, BAZ2A, CREBL2, ZBTB44, MLLT3, ORC4, ATXN1, …	697	1350	18883	1.76599	0.000173645	5.79563e-05	5.69127e-05
GOTERM_CC_DIRECT	GO:0005654~nucleoplasm	193	26.511	2.81251e-07	BACH1, ACTB, DCAF7, RASSF2, PPP4R2, PEG10, HOXA7, BTRC, SKP1, ISY1-RAB43, DDX17, FNBP4, MEF2C, SMARCC1, SFMBT1, ZNF281, SOX11, RRAGC, PRKD3, PSME4, FAM76A, CLOCK, GATA6, NEDD4L, EPB41L5, MYO6, TNRC18, PSMF1, ZNF148, PPARGC1A, HOXC8, PPARGC1B, NFATC2, NFATC1, TRERF1, A1CF, ELL2, PBX1, FOSL2, AGO1, NAPEPLD, HBP1, CPEB3, CDK13, SLC44A1, PHF20, PPP1R10, PHF6, LIMD2, SYNCRIP, ING5, PPP3CA, HNF4A, ARIH…	712	3972	20521	1.40045	0.00016508	4.12735e-05	3.9586e-05
GOTERM_BP_DIRECT	GO:0045893~positive regulation of transcription, DNA-templated	53	7.28022	8.14624e-07	PHF20, RORA, RORB, ETS1, ACTB, SIX4, HNF4A, GPBP1, BTRC, ATXN7L3, SMARCC1, MYOCD, MAP2K1, MEF2C, ZNF281, RFX3, PPM1A, ELF1, MYCN, CREB1, ELF4, TBL1XR1, CLOCK, CREB5, INO80D, NOTCH1, MYRF, LEF1, GATA6, CREBL2, MLLT3, MBTD1, ATXN7, NSD1, MTA2, E2F5, PPARGC1A, SMAD4, SMAD3, RBPMS, FZD4, FOXJ2, HMGA1, NFATC2, NFATC1, KLF4, TRERF1, SMAD5, HIPK2, PER2, NFIC, CAMK4, CRLF3	682	718	19256	2.08417	0.0027009	0.000901245	0.000898258
GOTERM_MF_DIRECT	GO:0000981~RNA polymerase II transcription factor activity, sequence-specific DNA binding	81	11.1264	1.04933e-06	CREBZF, THRB, ZNF570, UBP1, RORA, RORB, BACH1, ETS1, SIX4, HNF4A, ZNF644, HOXA7, KLF12, MEF2C, TGIF2, ZFP1, ZNF281, ZFP2, EBF1, RFX3, SOX11, PROX1, FOXP1, ELF1, MYCN, CREB1, MAF, ELF4, DMRTA1, TFEC, ZNF439, ERG, CLOCK, CREB5, ZNF275, DLX3, MYRF, ZBTB46, SATB1, PLAG1, SATB2, TSHZ2, LEF1, GATA6, CREBL2, PURB, ZNF627, ZKSCAN8, ZNF547, PLAGL2, E2F3, ZNF304, E2F5, HOXC8, HDX, ZNF584, ZNF583, SMAD4, PO…	697	1255	18883	1.74856	0.000872664	0.000218524	0.000214589
GOTERM_CC_DIRECT	GO:0010494~cytoplasmic stress granule	16	2.1978	1.18938e-06	DDX6, YTHDF2, DDX3X, RBPMS, LARP4, QKI, GIGYF2, HIPK2, DDX19B, LARP1, LIN28A, CAPRIN1, HABP4, IGF2BP1, IGF2BP3, TARDBP	712	97	20521	4.75408	0.000697921	0.000139633	0.000133924
GOTERM_MF_DIRECT	GO:0000978~RNA polymerase II core promoter proximal region sequence-specific DNA binding	76	10.4396	1.90662e-06	THRB, ZNF570, UBP1, RORA, RORB, BACH1, ETS1, SIX4, HNF4A, ZNF644, HOXA7, KLF12, MEF2C, TGIF2, ZFP1, ZNF281, ZFP2, EBF1, RFX3, SOX11, PROX1, SIRT1, RAD23B, FOXP1, HIC2, ELF1, MYCN, CREB1, MAF, ELF4, DMRTA1, TFEC, ERG, ZNF710, CLOCK, ZNF275, DLX3, SATB1, PLAG1, SATB2, LEF1, GATA6, ZNF704, NSD1, ZKSCAN8, ZNF547, E2F3, ZNF304, ZNF148, ZNF544, E2F5, ZNF268, HDX, ZNF584, ZNF583, SMAD4, POU2F1, SMAD3, F…	697	1170	18883	1.75981	0.00158505	0.000274443	0.000269501
GOTERM_MF_DIRECT	GO:1990837~sequence-specific double-stranded DNA binding	45	6.18132	1.97678e-06	DLX3, THRB, LEF1, GATA6, UBP1, RORB, ETS1, SIX4, ZNF704, HNF4A, ABL1, E2F3, HOXA7, HOXC8, KLF12, MEF2C, TGIF2, ZFP1, ZNF282, ZNF281, FOXJ3, FOXJ2, NFATC2, RFX3, NFATC1, PROX1, FOXN2, KLF4, SMAD5, PBX1, FOXP1, NR4A2, ELF1, LIN28B, MYCN, CREB1, MAF, TEF, ELF4, DMRTA1, NFIC, TFEC, ERG, CLOCK, CREB5	697	559	18883	2.18092	0.00164333	0.000274443	0.000269501
GOTERM_MF_DIRECT	GO:0043565~sequence-specific DNA binding	32	4.3956	2.46686e-06	THRB, CBFB, MYRF, SATB1, LEF1, RORA, RORB, ETS1, HNF4A, TRPS1, PLAGL2, E2F3, MTA2, HOXA7, ZNF148, PPARGC1A, SMAD4, POU2F1, SMAD3, ZNF281, FOXJ3, FOXJ2, FOXN3, FOXN2, TSN, FOXP1, NR4A2, ELF1, ERCC6, ERG, MAPT, CLOCK	697	334	18883	2.59562	0.00205032	0.000293556	0.00028827
GOTERM_MF_DIRECT	GO:0001228~transcriptional activator activity, RNA polymerase II transcription regulatory region sequence-specific binding	40	5.49451	6.59324e-06	DLX3, NOTCH1, PLAG1, SATB2, LEF1, UBP1, RORB, ETS1, BACH1, SIX4, HNF4A, PLAGL2, E2F3, HOXA7, ZNF544, ZNF268, MEF2C, SMAD4, POU2F1, SMAD3, FOXJ3, FOXJ2, NFATC2, SOX11, NFATC1, KLF4, PBX1, FOSL2, NR4A2, ELF1, MYCN, NR4A3, CREB1, MAF, TEF, ELF4, NFIC, TFEC, ERG, CLOCK	697	493	18883	2.19812	0.00547057	0.000686521	0.000674159
GOTERM_CC_DIRECT	GO:0005794~Golgi apparatus	67	9.2033	8.62924e-06	CNTNAP2, MCFD2, SERPINA1, HIP1, UBXN2B, TMEM167A, ZFYVE1, WDR44, RAB43, NDST1, STS, RASSF2, AP1G1, PDGFRA, GABARAPL1, MAP2K1, GLCE, PRKCE, AP1B1, GOLPH3L, ADAM10, SORCS1, ANK3, ASH1L, FNDC3A, ZDHHC16, ZDHHC17, AFTPH, PRKD1, ST6GALNAC3, MYRF, NEDD4L, ZDHHC21, CLCN3, RASGRP1, GIGYF2, STRN3, CAMSAP2, JAKMIP2, ARHGAP21, GANAB, NRAS, FUT8, FGD6, FUT9, MYO6, NAA25, GCNT2, ST8SIA4, RHO, TBC1D14, MAPK1, …	712	1095	20521	1.76352	0.00505258	0.000844227	0.00080971
GOTERM_CC_DIRECT	GO:0005737~cytoplasm	247	33.9286	1.32608e-05	GLTP, AHCYL1, CCNJ, AQP4, BACH1, ACTB, DCAF7, PCMT1, RASSF2, RASSF3, PPP4R2, PEG10, RASSF5, RAVER2, HABP4, DIP2B, HMCN1, BTRC, SKP1, DDX17, MEF2C, SMARCC1, PRKCE, FRS2, ACSL4, YOD1, FNDC3A, KIAA1217, EML5, RRAGC, PRKD3, TBPL1, TLN2, PRKD1, CLOCK, NAIP, NUMBL, MTMR3, CEP85L, NEDD4L, MTMR9, LARP1, RNF213, MYO6, STK38L, PLCG1, PSMF1, ZNF268, CDK17, NFATC2, SUCO, NFATC1, HSPA12A, A1CF, PBX1, AGO4, AG…	712	5636	20521	1.26312	0.00775394	0.00111202	0.00106655
GOTERM_MF_DIRECT	GO:0003729~mRNA binding	25	3.43407	1.36877e-05	KHDRBS1, DDX6, RBM47, DDX3X, CELF3, MSI2, PURB, PEG10, IGF2BP1, SPEN, YTHDF2, MYEF2, RBPMS, THOC2, A1CF, TSN, QKI, PTBP3, DDX19B, LIN28B, LIN28A, CAPRIN1, NOVA2, RBM20, DCP1A	697	245	18883	2.76447	0.0113236	0.00126687	0.00124406
GOTERM_CC_DIRECT	GO:0098978~glutamatergic synapse	33	4.53297	2.25215e-05	PTPRT, GPM6A, CNTNAP1, HIP1, NRXN1, ADAM22, ABHD17C, CLCN3, LIN7C, ACTB, RAP1B, EEA1, PPP3CA, LRRTM3, FLOT2, STK38L, PLCG1, NTNG1, MPP2, EPHA7, SYT1, KCND2, FZD4, GRID1, ADAM10, NSG1, SORCS3, SLC4A8, DLG3, SLC9A6, CDH11, NOS1AP, SHANK3	712	415	20521	2.29184	0.0131332	0.00159587	0.00153062
GOTERM_CC_DIRECT	GO:0005912~adherens junction	20	2.74725	2.44681e-05	MPP2, NOTCH1, PTPRM, ADAM10, FRS2, FRMD4B, DLL1, ACTB, EPB41L5, CYTH2, FER, FRMD5, DLG3, CCDC85A, CDH11, FLOT2, MYH9, ITGA6, HMCN1, VCL	712	185	20521	3.11585	0.0142603	0.00159587	0.00153062
GOTERM_CC_DIRECT	GO:0030425~dendrite	34	4.67033	3.10033e-05	HCN3, CNTNAP2, AMIGO1, HTR2C, PPP1R9A, STRN3, TRIM9, BRINP1, ALCAM, KIF3B, GRM7, ABL1, SACS, DIP2B, MARK4, SLC38A2, RCVRN, EPHA7, KCND2, FZD4, KCNB1, MAGI2, ADAM10, ANK3, NSG1, SLC4A8, ALS2, SLC9A6, DMWD, CAPRIN1, FAT3, MAPT, CPEB3, BMPR1A	712	441	20521	2.22208	0.0180346	0.0018199	0.00174549
GOTERM_BP_DIRECT	GO:0006468~protein phosphorylation	31	4.25824	3.5984e-05	CAMK2D, STK4, NUAK2, ABL1, MAPK1, ABL2, STK38L, MARK4, MAPK4, CDK17, MAP2K1, EPHA7, YES1, MAP3K1, PRKCE, ADAM10, ACVR2B, HIPK2, FER, CREB1, CDK6, STK24, PRKD3, PEAK1, TAOK1, CAMK4, CDK1, ERG, CDK13, FRK, BMPR1A	682	379	19256	2.30943	0.112608	0.0298577	0.0297587
GOTERM_CC_DIRECT	GO:0043197~dendritic spine	18	2.47253	3.87589e-05	MPP2, GPM6A, KCND2, KCNA4, ABHD17C, PPP1R9A, TANC2, PPP3CA, ABHD17B, ALS2, KIF3B, IGF2BP1, DIP2A, MAPT, CPEB3, ASIC2, SHANK3, LZTS3	712	159	20521	3.26283	0.022495	0.00206831	0.00198375
GOTERM_BP_DIRECT	GO:0007165~signal transduction	71	9.75275	9.14541e-05	PTPRT, CNTFR, CNTNAP1, RTKN, TENM4, ARHGAP1, PTPRM, FGF1, ARHGAP6, PITPNC1, IGF1R, IPO8, RASSF2, ALCAM, RASSF3, RASSF5, TAGAP, PPFIA1, GRB10, BTRC, CSNK1G3, MAP2K1, KCNK10, PDE4D, PRKCE, MAGI2, LRRC40, ANK2, ANK3, FNDC5, BCAM, CREB1, TRAF3, ERG, PRKD1, MET, CLOCK, NRXN1, NPR3, GPR85, CREBL2, STK4, RASGRP1, ARHGAP12, RAP1B, ARHGAP21, NRAS, CHN2, ABL2, MAPK1, FLNB, SHOC2, LRRC8B, SRGAP1, PAG1, RCVR…	682	1251	19256	1.60244	0.261875	0.0607072	0.060506
GOTERM_MF_DIRECT	GO:0008013~beta-catenin binding	13	1.78571	0.000112624	PTPRT, AMER1, AMER2, SMAD3, CTNNBIP1, LEF1, RORA, KLF4, NR4A2, TBL1XR1, BTRC, VCL, SKP1	697	90	18883	3.91326	0.0894518	0.00938158	0.00921265
GOTERM_CC_DIRECT	GO:0015629~actin cytoskeleton	23	3.15934	0.000119548	AUTS2, TPM3, CASK, PPP1R9A, ARHGAP6, CORO2B, ACTB, MTSS1, LIMD2, AKAP13, ARHGAP21, FER, AXL, PEAK1, MYO6, ABL1, STK38L, MYH9, ABL2, FLNB, TLN2, WASF1, DGKH	712	261	20521	2.53984	0.0677731	0.0058479	0.00560881
GOTERM_BP_DIRECT	GO:0010629~negative regulation of gene expression	26	3.57143	0.000130945	SLC24A3, NOTCH1, DDX3X, PLAG1, NRXN1, SNX12, PPP3CA, FLOT2, ITGB8, DIP2A, ZNF148, MEF2C, SMAD3, ZNF281, ADAM10, SOX11, KLF4, SIRT1, SMAD5, FOXP1, MYCN, PC, CDK1, MAPT, TARDBP, BMPR1A	682	312	19256	2.35288	0.352584	0.0724345	0.0721944
GOTERM_CC_DIRECT	GO:0098685~Schaffer collateral - CA1 synapse	13	1.78571	0.000145101	NTNG1, MPP2, HIP1, NRXN1, CASK, ACTB, EEA1, PPP3CA, SLC9A6, CDH11, PPFIA1, PLCG1, INA	712	98	20521	3.82328	0.0816536	0.00655188	0.006284
GOTERM_BP_DIRECT	GO:0006355~regulation of transcription, DNA-templated	57	7.82967	0.000233641	ZNF570, BNC2, PHF20, HP1BP3, RORA, RORB, BACH1, ING5, GPBP1, ZNF329, ZNF687, MEF2C, TGIF2, ZFP1, SFMBT1, ZNF282, ZNF281, RFX3, ASH1L, PROX1, MN1, TFEC, ZNF439, CLOCK, NOTCH1, PLAG1, IGSF1, BAZ2A, CREBL2, MLLT3, MBTD1, ZNF627, NSD1, ZKSCAN8, ABL1, ZNF547, ZNF304, ZNF544, PPARGC1A, ZNF268, PPARGC1B, ZNF584, ZNF583, SMAD4, SMAD3, BRPF3, CEP350, HMGA1, NFATC2, FOXN3, FOXN2, ACVR2B, SMAD5, GON4L, ZNF6…	682	972	19256	1.65573	0.539655	0.0823909	0.0821178
GOTERM_BP_DIRECT	GO:0007399~nervous system development	31	4.25824	0.000246075	CNTFR, NUMBL, NRN1, C3ORF70, ZC4H2, PPP1R9A, ATXN1, DPYSL4, IGF2BP1, ST8SIA4, IGF2BP3, DIP2B, MARK4, SMARCC1, MEF2C, CAMK1D, TMOD2, MAGI2, NAP1L1, NAV1, SOX11, ARHGAP26, NAV3, AXL, SPRY3, DCX, PRKD1, MET, ITM2B, NAIP, SCN2B	682	422	19256	2.07411	0.558275	0.0823909	0.0821178
GOTERM_BP_DIRECT	GO:0001525~angiogenesis	22	3.02198	0.000259622	PANK2, NOTCH1, ANGPT2, FZD4, NRXN1, NPR3, UBP1, RORA, VASH1, TSPAN12, FGF1, SIRT1, FMNL3, RNF213, GJA5, MYH9, ZNF304, CD47, PRKD1, AMOTL1, HOXA7, BMPR1A	682	252	19256	2.46493	0.577708	0.0823909	0.0821178
GOTERM_BP_DIRECT	GO:0030036~actin cytoskeleton organization	20	2.74725	0.000269927	AUTS2, ARHGAP26, CORO2B, MTSS1, ADD2, FMNL3, CYTH2, TBCK, FER, FGD6, NUAK2, DAAM1, ABL1, MYH9, KRAS, FLNB, RICTOR, HMCN1, AMOTL1, WASF1	682	217	19256	2.60227	0.591914	0.0823909	0.0821178
GOTERM_BP_DIRECT	GO:0010628~positive regulation of gene expression	35	4.80769	0.000273064	SLC24A3, NOTCH1, DDX3X, PLAG1, NRXN1, LEF1, FGF1, ETS1, DLL1, PPP3CA, CALCR, ITGB8, SLC38A2, PPARGC1A, MYOCD, MAP2K1, MEF2C, SMAD4, SMAD3, NFATC2, SOX11, ANK2, ANK3, KLF4, QKI, MYCN, CDK6, MAF, NOS1AP, CDK1, PLP1, KRAS, PRKD1, ERCC6, BMPR1A	682	505	19256	1.95685	0.596144	0.0823909	0.0821178
GOTERM_CC_DIRECT	GO:0005667~transcription factor complex	20	2.74725	0.000313927	SMAD4, SMAD3, LMO4, SATB2, LEF1, GATA6, HMGA1, NFATC2, RFX3, NFATC1, KLF4, TRERF1, SMAD5, NR4A2, NR4A3, SIX4, E2F3, MTA2, E2F5, CLOCK	712	224	20521	2.57336	0.168317	0.0131625	0.0126243
GOTERM_BP_DIRECT	GO:0045892~negative regulation of transcription, DNA-templated	38	5.21978	0.000323873	CREBZF, KHDRBS1, NOTCH1, LEF1, GATA6, RORB, PRICKLE1, STRN3, MBTD1, ATXN1, SIX4, HNF4A, MTA2, HOXA7, ZNF148, BTRC, PPARGC1B, SPEN, SMAD4, POU2F1, SFMBT1, ZNF282, ZNF281, HMGA1, RFX3, CDYL, FOXN3, PROX1, KLF4, TRERF1, CBFA2T3, SIRT1, FOXP1, PER2, HIC2, RLIM, MDM4, CLOCK	682	572	19256	1.87573	0.65885	0.0895779	0.0892811
GOTERM_BP_DIRECT	GO:0000122~negative regulation of transcription from RNA polymerase II promoter	58	7.96703	0.000355667	THRB, ARID4B, BACH1, PHF6, TRPS1, HOXA7, KLF12, MYOCD, MEF2C, TGIF2, LMO4, ZNF281, TET1, SOX11, PROX1, SIRT1, FOXP1, HIC2, PPM1A, MAF, TBL1XR1, TFEC, ZNF439, KHDRBS1, NOTCH1, CBFB, ZBTB46, SATB1, SATB2, LEF1, GATA6, STRN3, PURB, ATXN1, NSD1, BEND3, ZNF304, MTA2, ZNF148, HOXC8, ZNF268, SPEN, SMAD4, SMAD3, NFATC2, KLF4, ACVR2B, SMAD5, HIPK2, PER2, NR4A2, NR4A3, CDK6, NFIC, RLIM, MDM4, CPEB3, FRK	682	1011	19256	1.61979	0.693036	0.0908045	0.0905035
GOTERM_MF_DIRECT	GO:0046872~metal ion binding	135	18.544	0.000401638	ZNF570, XYLT1, ZFYVE1, STS, RASSF3, PAPOLG, RASSF5, ZNF329, POGZ, PLCE1, ZNF687, ATXN7L3, TNS3, ZFP1, LMO4, ZNF282, PRKCE, ZNF281, ZFP2, EBF1, ADAM10, YOD1, DGKZ, PRLR, FOXP1, PYGO1, HIC2, PRKD3, ZNF439, ZNF710, PRKD1, NAIP, DGKH, ZNF275, MTMR3, ZC4H2, TSHZ2, CACNA1A, CACNA1D, BAZ2A, CACNA1E, RNF213, ZNF704, ZKSCAN8, ZNF547, ZNF304, ZNF148, ZNF544, ZNF268, SMAD4, SMAD3, BRPF3, STAC, TRERF1, SMAD5…	697	2760	18883	1.32514	0.284111	0.0304149	0.0298673
GOTERM_CC_DIRECT	GO:0090575~RNA polymerase II transcription factor complex	14	1.92308	0.000403302	CREBZF, SMAD4, POU2F1, THRB, LMO4, HMGA1, BACH1, PBX1, HIPK2, FOSL2, CREB1, MAF, E2F3, E2F5	712	125	20521	3.22802	0.21084	0.0157825	0.0151373
GOTERM_CC_DIRECT	GO:0005925~focal adhesion	30	4.12088	0.000487677	CLTC, DIXDC1, ACTB, RAB21, EPB41L5, ALCAM, RRAS, PPFIA1, FLOT2, MAPK1, ITGB8, FLNB, WASF1, TNS3, GIT1, MPZL1, MAP2K1, YES1, HMGA1, ADAM10, CASK, ARHGAP26, CORO2B, PPFIBP1, PEAK1, MYH9, KRAS, ITGA6, TLN2, VCL	712	428	20521	2.02021	0.24899	0.0178917	0.0171601
GOTERM_BP_DIRECT	GO:0010467~gene expression	15	2.06044	0.000556663	DLX3, ANGPT2, GATA6, KLHL3, PRICKLE1, MLLT3, HIPK2, FOSL2, GRB10, KCNQ3, RHO, KPNA4, KRAS, SHANK3, SCN2B	682	143	19256	2.96167	0.842548	0.123171	0.122763
GOTERM_BP_DIRECT	GO:0009653~anatomical structure morphogenesis	15	2.06044	0.000556663	TPD52, CPM, SMAD4, SMAD3, EYA3, EYA4, GATA6, SOX11, FGF1, SMAD5, PTBP3, SIX4, MAB21L1, IGF2BP3, NFE2L1	682	143	19256	2.96167	0.842548	0.123171	0.122763
GOTERM_MF_DIRECT	GO:0031267~small GTPase binding	24	3.2967	0.000562825	RANBP2, RTKN, EXOC8, DENND5B, RCC2, ARHGAP1, MYRIP, SORL1, STRN3, WDR44, FMNL3, AKAP13, PEX5L, IPO8, FGD6, RIMS3, ALS2, DAAM1, KIF3B, AP1G1, SGSM2, PLCE1, WASF1, GIT1	697	293	18883	2.21913	0.373998	0.0390695	0.0383659
GOTERM_CC_DIRECT	GO:0000139~Golgi membrane	42	5.76923	0.000571298	ATP6V1A, NOTCH1, TMEM167A, XYLT1, ZDHHC21, CABP1, CLCN3, RASGRP1, RAB21, NDST1, LMAN1, ARHGAP21, CYTH2, NRAS, FUT8, FUT9, AP1G1, MGAT3, GCNT2, ST8SIA4, RHO, PLCE1, SLC30A8, WSCD2, GLCE, SURF4, AP1B1, GOLPH3L, ADAM10, FNDC3A, ZDHHC17, CBFA2T3, SORL1, TAPBP, STK24, MGAT4A, NAPEPLD, YIPF6, KRAS, ACBD3, ST6GALNAC3, ITM2B	712	689	20521	1.75691	0.284982	0.0189118	0.0181385
GOTERM_CC_DIRECT	GO:0001726~ruffle	12	1.64835	0.000579918	CLIP1, FGD6, CDK6, ALS2, PODXL, MYO6, ABL1, MYH9, PLCG1, TLN2, FRMD4B, MTSS1	712	98	20521	3.52918	0.288593	0.0189118	0.0181385
GOTERM_BP_DIRECT	GO:0017148~negative regulation of translation	12	1.64835	0.000628012	DDX6, SYNCRIP, DDX3X, LARP1, LIN28A, TRIM2, CAPRIN1, IGF2BP1, IGF2BP3, CPEB3, QKI, GIGYF2	682	97	19256	3.49294	0.875774	0.130273	0.129842
GOTERM_BP_DIRECT	GO:0001764~neuron migration	13	1.78571	0.000770788	GPM6A, MEF2C, AUTS2, SATB2, CEP85L, DCDC2, NAV1, CELSR1, NR4A2, COL3A1, AXL, DCX, MATN2	682	115	19256	3.19174	0.922695	0.150485	0.149986
GOTERM_CC_DIRECT	GO:0008023~transcription elongation factor complex	6	0.824176	0.000793579	NUFIP1, ERCC6, MLLT3, AFF4, ELL2, AFF1	712	22	20521	7.86044	0.372503	0.0244452	0.0234457
GOTERM_CC_DIRECT	GO:0045202~synapse	33	4.53297	0.000832886	RGS17, NRN1, CACNA1A, HTR2C, STON2, LIN7C, CACNA1E, ACTB, HAPLN1, RAB21, CHN2, MAPK1, GIT1, LZTS3, KCMF1, EIF5B, PRKCE, TMOD2, MAGI2, GABRA3, MYRIP, QKI, CAPRIN1, KCNQ3, PLP1, RGS10, CNTN2, TLN2, PDE7B, CPEB3, KCNK3, SDK2, SCN2B	712	506	20521	1.87967	0.386827	0.0244452	0.0234457
GOTERM_CC_DIRECT	GO:0043194~axon initial segment	6	0.824176	0.000985357	ADAM22, KCNQ3, CNTN2, KCNA4, NAV1, ANK3	712	23	20521	7.51869	0.439367	0.0275431	0.0264169
GOTERM_MF_DIRECT	GO:0061629~RNA polymerase II sequence-specific DNA binding transcription factor binding	17	2.33516	0.00139813	SPEN, GTF2A1, MEF2C, MYOCD, SMAD4, SMAD3, UHRF2, NFATC1, KLF4, STK4, ETS1, RAD23B, HIPK2, CREB1, HNF4A, MTA2, PPARGC1A	697	185	18883	2.48952	0.687783	0.0895877	0.0879744
GOTERM_CC_DIRECT	GO:0005856~cytoskeleton	33	4.53297	0.001553	PLEKHH2, HIP1, CABP1, PPP1R9A, ADD3, ACTB, ADD2, EPB41L5, TRIM9, FGD6, EPB41L1, MAPK1, FLNB, WASF1, TRIM67, LZTS3, MPP2, AUTS2, TPM3, PRKCE, TMOD2, KLHL3, ANK2, ANK3, FRMD4B, ARHGAP26, FER, CLIP1, FRMD5, GAN, DCX, PTPN4, VCL	712	526	20521	1.8082	0.598408	0.0414368	0.0397426
GOTERM_BP_DIRECT	GO:0045669~positive regulation of osteoblast differentiation	10	1.37363	0.00169745	PPP3CA, MEF2C, CTNNBIP1, SUCO, SOX11, PRKD1, IL6R, SMAD5, ACVR2B, BMPR1A	682	78	19256	3.61982	0.996448	0.302962	0.301958
GOTERM_CC_DIRECT	GO:0016020~membrane	230	31.5934	0.00170691	CNTFR, PANK2, TMEM200B, XYLT1, AQP4, ZFYVE1, ACTB, SCAMP4, NDST1, ALCAM, STS, PEG10, DIP2A, DIP2B, DDX17, GABARAPL1, EPHA7, ALG9, KCNK10, ACSL1, FNDC3B, FRS2, ACSL4, MOGS, ANK2, ANK3, FNDC3A, FNDC5, BCAM, RRAGC, DAAM1, PRKD3, KCNQ3, KCNQ5, FAR1, PRKD1, GPM6A, MTMR3, IGSF1, GIGYF2, LARP1, RNF213, MYO6, STK38L, PSMF1, VAT1, RCC2, SUCO, LARP4, AGO4, TMCC3, FAT3, FAT4, DCP1A, ITM2B, MRS2, DDR1, PTPRT…	712	5595	20521	1.1848	0.633153	0.0435633	0.0417822
GOTERM_BP_DIRECT	GO:0050804~modulation of synaptic transmission	10	1.37363	0.00185693	NTNG1, SLC4A8, PPP3CA, EPHA7, GRID1, CDH11, CACNA1A, PLCG1, SLC7A11, PPP1R9A	682	79	19256	3.574	0.99791	0.302962	0.301958
GOTERM_BP_DIRECT	GO:0007169~transmembrane receptor protein tyrosine kinase signaling pathway	12	1.64835	0.00191691	PTPRT, DDR1, PDGFRA, YES1, AXL, SAMD12, MET, MPZL1, FRK, MTSS1, PTPRG, IGF1R	682	111	19256	3.05239	0.998288	0.302962	0.301958
GOTERM_BP_DIRECT	GO:0007229~integrin-mediated signaling pathway	12	1.64835	0.00191691	COL3A1, FUT8, RCC2, ADAM22, ABL1, ITGB8, MYH9, ADAM10, ITGA6, ZNF304, CD47, PRKD1	682	111	19256	3.05239	0.998288	0.302962	0.301958
GOTERM_MF_DIRECT	GO:0001222~transcription corepressor binding	8	1.0989	0.00200189	PER2, SMAD4, SMAD3, LEF1, RORA, ZNF644, ETS1, PBX1	697	49	18883	4.42315	0.811233	0.119112	0.116967
GOTERM_CC_DIRECT	GO:0036464~cytoplasmic ribonucleoprotein granule	10	1.37363	0.00228529	UPF2, DDX6, YTHDF2, AGO4, AGO1, RBM20, MAPT, DCP1A, INA, ACTB	712	83	20521	3.47249	0.738939	0.0558944	0.0536091
GOTERM_BP_DIRECT	GO:0006366~transcription from RNA polymerase II promoter	19	2.60989	0.0023991	GTF2A1, MYOCD, SMAD4, NOTCH1, MYEF2, CBFB, LEF1, NFATC2, ARID4B, PROX1, ASH1L, KLF4, ETS1, NR4A2, MAF, HNF4A, NFIC, TBPL1, ERCC6	682	241	19256	2.22596	0.999656	0.335751	0.334638
GOTERM_MF_DIRECT	GO:0005524~ATP binding	79	10.8516	0.00243051	DDR1, PANK2, DDX3X, ACTB, IGF1R, PAPOLG, DDX17, PDGFRA, CSNK1G3, ABCC1, MAP2K1, RPS6KL1, EPHA7, CAMK1D, ACSL1, DCAKD, MARS2, PRKCE, UBE2E3, UBE2E1, ATP11C, CASK, ACSL4, DGKZ, DDX19B, NAV3, PRKD3, MYH9, PRKD1, MET, NAIP, DGKH, ATP6V1A, DDX6, CAMK2D, UBA6, VPS4A, TRANK1, ATP10A, STK4, CLCN3, PAPSS2, ORC4, RNF213, NUAK2, KIF3B, MYO6, ABL1, ABL2, MAPK1, STK38L, MARK4, MAPK4, CDK17, ATP8B4, YES1, MAP3…	697	1540	18883	1.38978	0.867959	0.134974	0.132544
GOTERM_BP_DIRECT	GO:0000082~G1/S transition of mitotic cell cycle	9	1.23626	0.00243362	KHDRBS1, PPP6C, PPP3CA, CDK6, CCNE2, CDK1, E2F3, BCAT1, CDC25A	682	67	19256	3.79271	0.999693	0.335751	0.334638
GOTERM_BP_DIRECT	GO:0042752~regulation of circadian rhythm	9	1.23626	0.00243362	PER2, HNF4A, CDK1, RORB, PROX1, BTRC, TARDBP, CLOCK, PPARGC1A	682	67	19256	3.79271	0.999693	0.335751	0.334638
GOTERM_CC_DIRECT	GO:0000932~P-body	11	1.51099	0.00245132	DDX6, YTHDF2, LIN28A, RBPMS, AGO4, AGO1, CAPRIN1, IGF2BP1, IGF2BP3, DCP1A, TNRC6B	712	100	20521	3.17038	0.763236	0.057557	0.0552037
GOTERM_BP_DIRECT	GO:0051726~regulation of cell cycle	19	2.60989	0.00262336	CDK17, INO80D, UHRF2, VASH1, ACTB, HIPK2, PER2, MBTD1, ING5, PPM1A, CDK6, ABL1, MDM4, HBP1, TARDBP, CDK13, BTRC, CCNL1, ZNF268	682	243	19256	2.20764	0.999837	0.335751	0.334638
GOTERM_CC_DIRECT	GO:0030027~lamellipodium	16	2.1978	0.00275819	PLEKHH2, DDX3X, PTPRM, DGKZ, ACTB, FER, FGD6, ALS2, PODXL, CAPRIN1, IGF2BP1, FLOT2, PLCE1, PLCG1, WASF1, GIT1	712	191	20521	2.41438	0.802358	0.0622716	0.0597255
GOTERM_BP_DIRECT	GO:0007010~cytoskeleton organization	14	1.92308	0.0027739	CNTNAP1, ANK2, ANK3, LARP4, ADD3, FMNL3, ARHGAP21, FGD6, GAN, ZMYM4, RANBP10, RICTOR, TLN2, BRWD3	682	151	19256	2.61778	0.999901	0.335751	0.334638
GOTERM_BP_DIRECT	GO:0016310~phosphorylation	37	5.08242	0.0028288	PANK2, CAMK2D, STK4, PAPSS2, IGF1R, AKAP1, AKAP13, NUAK2, ABL1, MAPK1, MAPK4, GIT1, CDK17, CSNK1G3, MAP2K1, RPS6KL1, EPHA7, CAMK1D, YES1, PRKCE, MAGI2, CASK, DGKZ, ACVR2B, HIPK2, FER, STK24, PRKD3, AXL, TAOK1, CAMK4, PRKD1, CDK13, MET, FRK, DGKH, BMPR1A	682	623	19256	1.67685	0.999918	0.335751	0.334638
GOTERM_BP_DIRECT	GO:0007179~transforming growth factor beta receptor signaling pathway	11	1.51099	0.00283584	COL3A1, FUT8, SMAD4, SMAD3, COL1A2, GCNT2, ITGB8, SIRT1, SMAD5, BMPR1A, HIPK2	682	100	19256	3.10581	0.99992	0.335751	0.334638
GOTERM_CC_DIRECT	GO:0043235~receptor complex	17	2.33516	0.0028845	DDR1, PDGFRA, CR2, NOTCH1, SMAD3, GPR63, PRLR, ACVR2B, LRP1B, IGF1R, PEX5L, GRM7, AXL, ITGB8, MET, IL6R, BMPR1A	712	211	20521	2.32212	0.816519	0.0627111	0.0601471
GOTERM_BP_DIRECT	GO:0071560~cellular response to transforming growth factor beta stimulus	9	1.23626	0.00293365	EPB41L5, PPM1A, MEF2C, SMAD4, YES1, SMAD3, ABL1, NFATC1, IGF1R	682	69	19256	3.68277	0.999942	0.335751	0.334638
GOTERM_MF_DIRECT	GO:0000976~transcription regulatory region sequence-specific DNA binding	19	2.60989	0.00294543	MEF2C, SMAD4, DLX3, SMAD3, ZBTB46, ZNF281, GATA6, RFX3, SOX11, ARID4B, PROX1, KLF4, ETS1, PBX1, PER2, TBL1XR1, RBBP5, HNF4A, ZNF579	697	236	18883	2.18112	0.914069	0.153346	0.150585
GOTERM_BP_DIRECT	GO:0010812~negative regulation of cell-substrate adhesion	5	0.686813	0.00319312	NOTCH1, ANGPT2, FZD4, GCNT2, CORO2B	682	18	19256	7.84295	0.999976	0.353265	0.352094
GOTERM_BP_DIRECT	GO:0006511~ubiquitin-dependent protein catabolic process	18	2.47253	0.0037972	RNF11, PSMD11, PPP1R11, UBA6, UBE2E1, UBR3, NEDD4L, KLHL3, HECTD1, RNF213, OS9, KCTD21, RLIM, RNF150, PSMF1, ARIH1, BTRC, SKP1	682	232	19256	2.19062	0.999997	0.406545	0.405197
GOTERM_MF_DIRECT	GO:0003779~actin binding	24	3.2967	0.00392832	PLEKHH2, HIP1, TPM3, TMOD2, DIXDC1, KLHL3, MYRIP, VASH1, CORO2B, MTSS1, ADD2, FMNL3, DAAM1, CLMN, EPB41L1, MYO6, STK38L, MYH9, FLNB, MAPT, TLN2, WASF1, SHANK3, VCL	697	340	18883	1.91236	0.962176	0.192488	0.189022
GOTERM_BP_DIRECT	GO:0048699~generation of neurons	4	0.549451	0.00438679	CDK6, SIX4, THOC2, MAPT	682	10	19256	11.2938	1	0.454992	0.453484
GOTERM_MF_DIRECT	GO:0004672~protein kinase activity	26	3.57143	0.00456897	DDR1, CAMK2D, STK4, RASSF2, NUAK2, ABL1, ABL2, STK38L, MARK4, CDK17, PDGFRA, CSNK1G3, MAP2K1, RPS6KL1, MAP3K1, PRKCE, CASK, HIPK2, TBCK, STK24, PEAK1, TAOK1, CAMK4, CDK1, CDK13, MET	697	385	18883	1.82958	0.977854	0.211442	0.207634
GOTERM_BP_DIRECT	GO:0000381~regulation of alternative mRNA splicing, via spliceosome	8	1.0989	0.00464019	DDX17, KHDRBS1, RBM47, RBPMS, CELF2, NOVA2, CELF3, RBM20	682	59	19256	3.82842	1	0.466691	0.465144
GOTERM_CC_DIRECT	GO:0009898~cytoplasmic side of plasma membrane	11	1.51099	0.00488666	RAB21, PPP3CA, FER, STAC, TRAF3, MYH9, ESYT3, KRAS, SAMD12, PTPN4, CHMP7	712	110	20521	2.88216	0.943612	0.102445	0.0982568
GOTERM_BP_DIRECT	GO:1902895~positive regulation of pri-miRNA transcription from RNA polymerase II promoter	8	1.0989	0.00509658	MYOCD, SMAD4, MYCN, SMAD3, POU2F1, KLF4, ETS1, BMPR1A	682	60	19256	3.76461	1	0.497516	0.495867
GOTERM_BP_DIRECT	GO:0060395~SMAD protein signal transduction	7	0.961538	0.00537693	SMAD4, SMAD3, RBPMS, HNF4A, MAGI2, SMAD5, HIPK2	682	46	19256	4.29657	1	0.509886	0.508196
GOTERM_MF_DIRECT	GO:0008270~zinc ion binding	49	6.73077	0.00540071	CPM, RNF11, THRB, BNC2, RORA, ECE1, RORB, ZFYVE1, PTPRG, EEA1, TRIM9, ZMYM4, TRIM2, PEG10, TRPS1, HNF4A, ARIH1, ATXN7L3, TRIM67, KCMF1, SLC30A8, ZNF282, TET2, TET1, MYRIP, CLIP1, MMP16, TRAF3, RBM20, SHANK3, GATA6, UBR3, PRICKLE1, RASGRP1, MBTD1, NSD1, VAT1, MAP3K1, SMAD3, KLF4, ZFHX4, NR4A2, SLC4A8, LIN28B, NR4A3, LIN28A, CPD, NAPEPLD, MDM4	697	889	18883	1.49325	0.988953	0.236779	0.232515
GOTERM_BP_DIRECT	GO:0030182~neuron differentiation	14	1.92308	0.00560039	DDX6, MAP2K1, MEF2C, MYEF2, FZD4, ACSL4, SOX11, HIPK2, FUT9, NOVA2, ABL1, ERCC6, MET, HOXC8	682	164	19256	2.41027	1	0.516325	0.514614
GOTERM_MF_DIRECT	GO:0042802~identical protein binding	85	11.6758	0.0057337	GLTP, CREBZF, AHCYL1, SERPINA1, HTR2C, PTPRM, AQP4, MSI2, ETS1, ACTB, IGF1R, PTPRG, EPM2AIP1, ALCAM, MCIDAS, RASSF3, RASSF5, DDI2, SACS, GRB10, CASP2, GRID1, COL25A1, CDYL, ZDHHC17, SIRT1, MTSS1, TSN, FOXP1, CLIP1, CREB1, MAF, ALS2, DAAM1, SLC9A6, TRAF3, PEAK1, DMRTA1, MYH9, MAPT, PRKD1, MET, GAS7, DGKH, CREB5, KHDRBS1, CAMK2D, NOTCH1, NUFIP1, MYRF, STK4, RASGRP1, GJC3, ATXN1, KCTD21, BTBD3, MYO6…	697	1734	18883	1.32803	0.991639	0.238809	0.234508
GOTERM_CC_DIRECT	GO:0098839~postsynaptic density membrane	10	1.37363	0.00607179	PTPRT, MPP2, ABHD17B, LRRTM3, DLG3, GRID1, ADAM22, ABHD17C, SORCS3, LIN7C	712	96	20521	3.00225	0.971985	0.122901	0.117877
GOTERM_MF_DIRECT	GO:0051015~actin filament binding	17	2.33516	0.00615715	HIP1, TPM3, PPP1R9A, ADD3, CORO2B, LIMD2, ADD2, FMNL3, CLMN, MYO6, ABL1, MYH9, ABL2, FLNB, TLN2, VCL, GAS7	697	215	18883	2.14214	0.994134	0.240331	0.236003
GOTERM_MF_DIRECT	GO:0044325~ion channel binding	13	1.78571	0.00634728	MPP2, CNTNAP2, CAMK2D, YES1, KCNC1, KCNB1, STAC, PDE4D, NEDD4L, ANK2, ANK3, RIMS3, FKBP1B	697	142	18883	2.48024	0.994997	0.240331	0.236003
GOTERM_BP_DIRECT	GO:0043524~negative regulation of neuron apoptotic process	13	1.78571	0.0063875	CNTFR, MEF2C, SIRT1, HIPK2, NR4A2, SLC25A27, TOX3, SIX4, AXL, KRAS, CPEB3, PPARGC1A, NAIP	682	148	19256	2.48007	1	0.572976	0.571077
GOTERM_BP_DIRECT	GO:0045163~clustering of voltage-gated potassium channels	3	0.412088	0.00714602	CNTNAP2, KCNB1, CNTN2	682	4	19256	21.176	1	0.592941	0.590976
GOTERM_BP_DIRECT	GO:0071205~protein localization to juxtaparanode region of axon	3	0.412088	0.00714602	CNTNAP2, CNTNAP1, CNTN2	682	4	19256	21.176	1	0.592941	0.590976
GOTERM_BP_DIRECT	GO:1903905~positive regulation of establishment of T cell polarity	3	0.412088	0.00714602	ABL1, ABL2, FLOT2	682	4	19256	21.176	1	0.592941	0.590976
GOTERM_BP_DIRECT	GO:0007409~axonogenesis	10	1.37363	0.00787606	NTNG1, NUMBL, CNTNAP1, CREB1, AMIGO1, ANK3, PRICKLE1, ZDHHC17, ACTB, IGF1R	682	98	19256	2.88108	1	0.637576	0.635463
GOTERM_MF_DIRECT	GO:0001223~transcription coactivator binding	7	0.961538	0.00806795	SMAD4, SMAD3, THRB, GATA6, NFATC1, RORA, TRERF1	697	48	18883	3.95089	0.998817	0.2922	0.286938
GOTERM_BP_DIRECT	GO:0016055~Wnt signaling pathway	15	2.06044	0.00849578	AMER1, CSNK1G3, AMER2, DLX3, DDX3X, FZD4, CTNNBIP1, LEF1, DIXDC1, SENP2, HBP1, RSPO1, AMOTL1, BTRC, RSPO4	682	192	19256	2.20583	1	0.656608	0.654432
GOTERM_BP_DIRECT	GO:0071805~potassium ion transmembrane transport	12	1.64835	0.00851123	SLC24A2, HCN3, SLC24A3, KCNC1, KCND2, SLC9A6, KCNK10, KCNB1, KCNQ3, KCNA4, KCNQ5, KCNK3	682	135	19256	2.50974	1	0.656608	0.654432
GOTERM_CC_DIRECT	GO:0005891~voltage-gated calcium channel complex	6	0.824176	0.00856854	PDE4D, SCN9A, CACHD1, CACNA1A, CACNA1D, CACNA1E	712	37	20521	4.67378	0.9936	0.167658	0.160803
GOTERM_MF_DIRECT	GO:0046332~SMAD binding	7	0.961538	0.00891437	PURB, COL3A1, SMAD4, COL1A2, MAGI2, BMPR1A, HIPK2	697	49	18883	3.87026	0.999419	0.295448	0.290127
GOTERM_MF_DIRECT	GO:0004713~protein tyrosine kinase activity	11	1.51099	0.00893014	FER, MAP2K1, EPHA7, YES1, AXL, ABL1, ABL2, MET, FRK, HIPK2, IGF1R	697	113	18883	2.63726	0.999426	0.295448	0.290127
GOTERM_BP_DIRECT	GO:0042981~regulation of apoptotic process	17	2.33516	0.00897185	RTKN, HIP1, FRS2, ETS1, SIRT1, ACTB, MBTD1, BCL2L13, TOX3, TRAF3, ABL1, CASP2, ABL2, GAS1, TARDBP, CCNL1, NAIP	682	233	19256	2.06004	1	0.656608	0.654432
GOTERM_BP_DIRECT	GO:0006470~protein dephosphorylation	11	1.51099	0.00909926	PTPRT, PPP6C, PPM1A, PPP3CA, MTMR3, CTDSP2, PTPRM, PPP2R3A, BTRC, PTPN4, PTPRG	682	118	19256	2.63204	1	0.656608	0.654432
GOTERM_BP_DIRECT	GO:0035556~intracellular signal transduction	26	3.57143	0.00910032	DDX3X, STK4, NUAK2, MAPK1, STK38L, PLCE1, PLCG1, MARK4, PAG1, MAPK4, SMAD4, WSB2, PRKCE, PLCL2, DCDC2, NFATC1, DGKZ, FER, NR4A3, PRKD3, CAMK4, DCX, PRKD1, RGL2, DGKH, ASB1	682	424	19256	1.73137	1	0.656608	0.654432
GOTERM_MF_DIRECT	GO:0004674~protein serine/threonine kinase activity	25	3.43407	0.00922165	CAMK2D, STK4, NUAK2, MAPK1, STK38L, MARK4, MAPK4, CDK17, CSNK1G3, MAP2K1, RPS6KL1, CAMK1D, MAP3K1, PRKCE, CASK, ACVR2B, HIPK2, STK24, PRKD3, TAOK1, CAMK4, CDK1, PRKD1, CDK13, BMPR1A	697	387	18883	1.75012	0.999551	0.295448	0.290127
GOTERM_BP_DIRECT	GO:0031100~animal organ regeneration	6	0.824176	0.00931202	UPF2, NOTCH1, ANGPT2, NR4A3, AXL, CDK1	682	37	19256	4.57858	1	0.657587	0.655408
GOTERM_BP_DIRECT	GO:0007265~Ras protein signal transduction	9	1.23626	0.00966231	NRAS, RRAS, PLCE1, SHOC2, KRAS, RGL2, RASGRP1, SOS2, RALGPS2	682	84	19256	3.02514	1	0.668108	0.665894
GOTERM_MF_DIRECT	GO:0019902~phosphatase binding	7	0.961538	0.0107945	SPRED1, SMAD3, PPP1R11, DLG3, MAGI2, NFATC2, MAPK1	697	51	18883	3.71849	0.99988	0.333029	0.327032
GOTERM_BP_DIRECT	GO:0031016~pancreas development	5	0.686813	0.010856	HNF4A, ILDR2, PROX1, MET, ACVR2B	682	25	19256	5.64692	1	0.735326	0.732889
GOTERM_BP_DIRECT	GO:1900452~regulation of long term synaptic depression	3	0.412088	0.0116317	MAPT, SORCS3, SHANK3	682	5	19256	16.9408	1	0.756972	0.754463
GOTERM_BP_DIRECT	GO:0048679~regulation of axon regeneration	3	0.412088	0.0116317	MAP2K1, STK24, KLF4	682	5	19256	16.9408	1	0.756972	0.754463
GOTERM_BP_DIRECT	GO:0031054~pre-miRNA processing	4	0.549451	0.0119755	LIN28B, LIN28A, AGO4, AGO1	682	14	19256	8.06703	1	0.764358	0.761825
GOTERM_CC_DIRECT	GO:0042383~sarcolemma	10	1.37363	0.0120413	PPP3CA, CAMK2D, STAC, KCNB1, NOS1AP, AQP4, ANK2, ANK3, SLC38A2, VCL	712	107	20521	2.69361	0.999184	0.228007	0.218685
GOTERM_BP_DIRECT	GO:0010842~retina layer formation	5	0.686813	0.0124783	PTPRM, FAT3, TSPAN12, SDK2, HIPK2	682	26	19256	5.42973	1	0.777139	0.774563
GOTERM_BP_DIRECT	GO:0010976~positive regulation of neuron projection development	11	1.51099	0.012644	DDR1, CAMK1D, FUT9, NRXN1, AMIGO1, MAGI2, ABL2, SHOC2, ITGA6, PRKD1, TRIM67	682	124	19256	2.50468	1	0.777139	0.774563
GOTERM_BP_DIRECT	GO:0030177~positive regulation of Wnt signaling pathway	6	0.824176	0.0128935	FZD4, LEF1, DIXDC1, RSPO1, SULF1, RSPO4	682	40	19256	4.23519	1	0.778066	0.775487
GOTERM_MF_DIRECT	GO:0043539~protein serine/threonine kinase activator activity	7	0.961538	0.0129392	MAP2K1, DDX3X, ALS2, ACSL1, TAOK1, RICTOR, STK4	697	53	18883	3.57817	0.99998	0.38494	0.378009
GOTERM_CC_DIRECT	GO:0005911~cell-cell junction	14	1.92308	0.0135904	MPP2, FZD4, MAGI2, PTPRM, CASK, FRS2, ADD3, LIN7C, ACTB, RAP1B, RHO, PRKD1, PLCG1, VCL	712	187	20521	2.15777	0.999675	0.236798	0.227117
GOTERM_CC_DIRECT	GO:0005903~brush border	7	0.961538	0.0137306	MYH9, FLNB, PDZK1, ADD3, SLC38A2, VCL, ACTB	712	57	20521	3.5395	0.999701	0.236798	0.227117
GOTERM_CC_DIRECT	GO:0032588~trans-Golgi network membrane	10	1.37363	0.0142466	RAB43, SCAMP4, NDST1, AFTPH, FUT9, AP1G1, CLTC, AP1B1, GOLPH3L, NSG1	712	110	20521	2.62015	0.99978	0.236798	0.227117
GOTERM_CC_DIRECT	GO:0048786~presynaptic active zone	6	0.824176	0.0145226	PPFIBP1, CNTNAP1, RIMS3, NUFIP1, GRM7, PPFIA1	712	42	20521	4.11738	0.999814	0.236798	0.227117
GOTERM_CC_DIRECT	GO:0030315~T-tubule	6	0.824176	0.0145226	STAC, NOS1AP, ANK2, ANK3, SCN2B, IGF1R	712	42	20521	4.11738	0.999814	0.236798	0.227117
GOTERM_BP_DIRECT	GO:0009791~post-embryonic development	8	1.0989	0.0145396	NR4A2, CCDC47, SCN9A, ABL1, PLAGL2, ASH1L, ACVR2B, GIGYF2	682	73	19256	3.0942	1	0.847545	0.844736
GOTERM_BP_DIRECT	GO:0006491~N-glycan processing	4	0.549451	0.0145819	FUT8, GANAB, MGAT4A, ST8SIA4	682	15	19256	7.52923	1	0.847545	0.844736
GOTERM_BP_DIRECT	GO:0051897~positive regulation of protein kinase B signaling	14	1.92308	0.0151938	DDR1, PDGFRA, HIP1, NRXN1, SIRT1, IGF1R, FER, LIN28A, CALCR, AXL, GCNT2, RICTOR, PRKD1, RGL2	682	186	19256	2.12519	1	0.847545	0.844736
GOTERM_BP_DIRECT	GO:0043161~proteasome-mediated ubiquitin-dependent protein catabolic process	16	2.1978	0.0154174	PSMD11, UBXN2B, NEDD4L, KLHL3, SIRT1, RAD23B, TRIM9, HECTD1, RMND5A, APPBP2, TBL1XR1, TRIM2, PSMF1, BTRC, CLOCK, SKP1	682	227	19256	1.9901	1	0.847545	0.844736
GOTERM_BP_DIRECT	GO:0007268~chemical synaptic transmission	16	2.1978	0.0160897	MPP2, KCND2, SYT1, NRXN1, CACNA1A, HTR2C, CACNA1E, GRM7, DLG3, PLP1, KCNQ3, MAPK1, PDE7B, ASIC2, KCNK3, SCN2B	682	228	19256	1.98138	1	0.847545	0.844736
GOTERM_MF_DIRECT	GO:0048027~mRNA 5'-UTR binding	5	0.686813	0.0163591	SYNCRIP, DDX3X, LARP1, IGF2BP1, IGF2BP3	697	27	18883	5.017	0.999999	0.460598	0.452304
GOTERM_BP_DIRECT	GO:0046777~protein autophosphorylation	12	1.64835	0.0169315	DDR1, PDGFRA, FER, CAMK2D, STK24, PEAK1, CAMK4, TAOK1, ABL1, PRKD1, STK4, IGF1R	682	149	19256	2.27393	1	0.847545	0.844736
GOTERM_MF_DIRECT	GO:0003723~RNA binding	71	9.75275	0.0169655	OTUD4, AHCYL1, DDX3X, PPP1R10, CELF2, CCDC47, CELF3, CLTC, MSI2, PHF6, SYNCRIP, PEG10, PAPOLG, GPBP1, RAVER2, HABP4, DDX17, UPF2, ISY1-RAB43, EIF5B, NSUN4, SECISBP2L, FNDC3B, FNDC3A, TSN, PTBP3, DDX19B, MYH9, RBM20, HNRNPH2, MAPT, KHDRBS1, DDX6, RBM47, NUFIP1, BAZ2A, GIGYF2, AKAP1, PURB, GANAB, LARP1, IGF2BP1, FLNB, IGF2BP3, PPARGC1A, PPARGC1B, SRSF11, RANBP2, SPEN, YTHDF2, MYEF2, RBPMS, RCC2, HM…	697	1475	18883	1.30408	0.999999	0.460598	0.452304
GOTERM_BP_DIRECT	GO:0050672~negative regulation of lymphocyte proliferation	3	0.412088	0.017041	RASSF3, RASSF5, SOX11	682	6	19256	14.1173	1	0.847545	0.844736
GOTERM_BP_DIRECT	GO:0030578~PML body organization	3	0.412088	0.017041	HABP4, ETS1, HIPK2	682	6	19256	14.1173	1	0.847545	0.844736
GOTERM_BP_DIRECT	GO:0042297~vocal learning	3	0.412088	0.017041	CNTNAP2, NRXN1, SHANK3	682	6	19256	14.1173	1	0.847545	0.844736
GOTERM_CC_DIRECT	GO:0032809~neuronal cell body membrane	5	0.686813	0.0170504	SLC4A8, KCNC1, KCND2, KCNB1, AMIGO1	712	29	20521	4.96925	0.999959	0.270502	0.259443
GOTERM_MF_DIRECT	GO:0005096~GTPase activator activity	19	2.60989	0.0171411	RANBP2, RGS17, ARHGEF12, ELMOD1, ARHGAP1, ARHGAP26, ARHGAP6, ARHGAP12, ARHGAP21, TBCK, ALS2, CHN2, TAGAP, SGSM2, RGS10, TBC1D14, SRGAP1, GIT1, TBC1D15	697	282	18883	1.82534	0.999999	0.460598	0.452304
GOTERM_BP_DIRECT	GO:0001756~somitogenesis	6	0.824176	0.0173056	SMAD3, LEF1, PLXNA2, PPP2R3A, DLL1, BMPR1A	682	43	19256	3.93971	1	0.847545	0.844736
GOTERM_BP_DIRECT	GO:0001702~gastrulation with mouth forming second	4	0.549451	0.0174834	SMAD4, TENM4, FRS2, ACVR2B	682	16	19256	7.05865	1	0.847545	0.844736
GOTERM_BP_DIRECT	GO:0071625~vocalization behavior	4	0.549451	0.0174834	CNTNAP2, BRINP1, NRXN1, SHANK3	682	16	19256	7.05865	1	0.847545	0.844736
GOTERM_BP_DIRECT	GO:0003161~cardiac conduction system development	4	0.549451	0.0174834	SMAD4, GJA5, SMAD5, BMPR1A	682	16	19256	7.05865	1	0.847545	0.844736
GOTERM_BP_DIRECT	GO:0007612~learning	7	0.961538	0.0176199	SLC24A2, CNTNAP2, ATXN1, UBA6, NRXN1, SORCS3, SHANK3	682	59	19256	3.34987	1	0.847545	0.844736
GOTERM_BP_DIRECT	GO:0048041~focal adhesion assembly	5	0.686813	0.0182432	PEAK1, RCC2, CDH11, CORO2B, ARHGAP6	682	29	19256	4.86804	1	0.864987	0.86212
GOTERM_BP_DIRECT	GO:0048812~neuron projection morphogenesis	7	0.961538	0.0190114	GPM6A, CNTNAP2, CNTNAP1, SLC9A6, ALS2, NRXN1, GAS7	682	60	19256	3.29404	1	0.888717	0.885772
GOTERM_CC_DIRECT	GO:0042995~cell projection	13	1.78571	0.0190681	PPP1R16B, ANGPT2, CEP350, NRXN1, CACNA1A, ZDHHC17, FER, SH3PXD2A, GJA5, DCX, PLCG1, TNS3, VCL	712	175	20521	2.14104	0.999988	0.294551	0.282508
GOTERM_MF_DIRECT	GO:0030374~ligand-dependent nuclear receptor transcription coactivator activity	7	0.961538	0.0195698	HMGA1, NCOA7, ETS1, TRERF1, ATXN7L3, PPARGC1A, PPARGC1B	697	58	18883	3.2697	1	0.483457	0.474751
GOTERM_MF_DIRECT	GO:0005249~voltage-gated potassium channel activity	7	0.961538	0.0195698	HCN3, KCNC1, KCND2, KCNB1, KCNQ3, KCNA4, KCNQ5	697	58	18883	3.2697	1	0.483457	0.474751
GOTERM_MF_DIRECT	GO:0003713~transcription coactivator activity	18	2.47253	0.0199048	DDX17, SMARCC1, MYOCD, NOTCH1, MYEF2, CBFB, RBPMS, HMGA1, TRERF1, SIRT1, QKI, HIPK2, PER2, TOX3, ABL1, MTA2, ATXN7L3, PPARGC1A	697	266	18883	1.83328	1	0.483457	0.474751
GOTERM_BP_DIRECT	GO:0030154~cell differentiation	35	4.80769	0.0202248	HIP1, THRB, NOTCH1, DDX3X, UHRF2, GATA6, ILDR2, NEDD4L, CREBL2, FGF1, ETS1, RASGRP1, DLL1, HNF4A, PEG10, ZNF268, MEF2C, SMAD4, YES1, SMAD3, SYT1, SFMBT1, EYA3, EYA4, FOXJ3, FOXJ2, SMAD5, ELF1, ELF4, CAPRIN1, PRKD1, ERG, SLC25A31, INA, FRK	682	665	19256	1.48603	1	0.932309	0.929219
GOTERM_MF_DIRECT	GO:0016922~ligand-dependent nuclear receptor binding	6	0.824176	0.0203133	SMAD3, BAZ2A, NCOA7, PROX1, SIRT1, PPARGC1A	697	43	18883	3.78025	1	0.483457	0.474751
GOTERM_MF_DIRECT	GO:0003785~actin monomer binding	5	0.686813	0.0208988	COBLL1, PRKCE, ABL1, ABL2, MTSS1	697	29	18883	4.671	1	0.483575	0.474867
GOTERM_CC_DIRECT	GO:0043005~neuron projection	19	2.60989	0.0220413	MPP2, GPM6A, RGS17, CAMK2D, AHCYL2, SYT1, TENM4, GABRA3, ANK2, ANK3, STON2, SLC4A8, DLG3, DCX, MAPT, CPEB3, MARK4, SHANK3, GIT1	712	308	20521	1.77796	0.999998	0.329036	0.315583
GOTERM_CC_DIRECT	GO:0071141~SMAD protein complex	3	0.412088	0.0224215	SMAD4, SMAD3, SMAD5	712	7	20521	12.3521	0.999998	0.329036	0.315583
GOTERM_BP_DIRECT	GO:0048863~stem cell differentiation	6	0.824176	0.0226163	GPM6A, PSMD11, LIN28A, ZNF281, GATA6, HOXA7	682	46	19256	3.68277	1	1	0.996986
GOTERM_MF_DIRECT	GO:0000987~core promoter proximal region sequence-specific DNA binding	7	0.961538	0.0227704	NOTCH1, SMAD3, HMGA1, E2F3, FOXN3, FOXN2, ELL2	697	60	18883	3.16071	1	0.512642	0.503411
GOTERM_BP_DIRECT	GO:0070372~regulation of ERK1 and ERK2 cascade	5	0.686813	0.0228701	EPHA7, RRAS, FRS2, RASGRP1, ZDHHC17	682	31	19256	4.55397	1	1	0.996986
GOTERM_BP_DIRECT	GO:0000183~chromatin silencing at rDNA	3	0.412088	0.0233032	BEND3, BAZ2A, SIRT1	682	7	19256	12.1005	1	1	0.996986
GOTERM_MF_DIRECT	GO:0043495~protein anchor	5	0.686813	0.0234302	RRAGC, MYH9, KRAS, PDZK1, ATG2B	697	30	18883	4.5153	1	0.513615	0.504366
GOTERM_BP_DIRECT	GO:0050872~white fat cell differentiation	4	0.549451	0.0241803	PER2, PDGFRA, TBL1XR1, SIRT1	682	18	19256	6.27436	1	1	0.996986
GOTERM_BP_DIRECT	GO:0070527~platelet aggregation	6	0.824176	0.0245964	PDGFRA, MYH9, SLC7A11, METAP1, VCL, ACTB	682	47	19256	3.60442	1	1	0.996986
GOTERM_MF_DIRECT	GO:0032051~clathrin light chain binding	3	0.412088	0.0251861	HIP1, CLTC, NSG1	697	7	18883	11.6108	1	0.52452	0.515075
GOTERM_MF_DIRECT	GO:0005085~guanyl-nucleotide exchange factor activity	16	2.1978	0.025187	ARHGEF12, DENND5B, RCC2, ARHGEF38, RAP1GDS1, RASGRP1, AKAP13, CYTH2, FGD6, ALS2, TAGAP, PLCE1, PLCG1, RGL2, SOS2, RALGPS2	697	232	18883	1.8684	1	0.52452	0.515075
GOTERM_BP_DIRECT	GO:0048009~insulin-like growth factor receptor signaling pathway	5	0.686813	0.0254271	MAP2K1, GRB10, MAPK1, GIGYF2, IGF1R	682	32	19256	4.41166	1	1	0.996986
GOTERM_BP_DIRECT	GO:0048706~embryonic skeletal system development	5	0.686813	0.0254271	KIAA1217, MBTD1, XYLT1, SULF1, PBX1	682	32	19256	4.41166	1	1	0.996986
GOTERM_BP_DIRECT	GO:0051402~neuron apoptotic process	8	1.0989	0.0259297	NR4A2, EPHA7, AXL, ABL1, KCNQ3, KRAS, PPARGC1A, HIPK2	682	82	19256	2.7546	1	1	0.996986
GOTERM_BP_DIRECT	GO:0071456~cellular response to hypoxia	11	1.51099	0.025955	NOTCH1, KCND2, PRKCE, HP1BP3, GATA6, MDM4, RORA, ADO, SIRT1, KCNK3, HIPK2	682	139	19256	2.23439	1	1	0.996986
GOTERM_BP_DIRECT	GO:0001701~in utero embryonic development	15	2.06044	0.0259717	PDGFRA, SMAD4, NOTCH1, SMAD3, GATA6, ADAM10, UBR3, TANC2, EPB41L5, COL3A1, FUT8, SH3PXD2A, MYH9, PLCG1, BMPR1A	682	221	19256	1.91638	1	1	0.996986
GOTERM_MF_DIRECT	GO:0004715~non-membrane spanning protein tyrosine kinase activity	6	0.824176	0.0264537	FER, YES1, PEAK1, ABL1, ABL2, FRK	697	46	18883	3.53372	1	0.533941	0.524326
GOTERM_CC_DIRECT	GO:0044305~calyx of Held	4	0.549451	0.0265359	KCNC1, KCNQ5, GIT1, ACTB	712	19	20521	6.06771	1	0.379917	0.364384
GOTERM_BP_DIRECT	GO:0048538~thymus development	6	0.824176	0.0266845	MAP2K1, SIX4, LMO4, ABL1, MAPK1, PBX1	682	48	19256	3.52933	1	1	0.996986
GOTERM_BP_DIRECT	GO:0006606~protein import into nucleus	9	1.23626	0.0267435	PPP3CA, IPO8, NOTCH1, PPP1R10, KCNQ3, KPNA4, E2F3, PRICKLE1, STK4	682	101	19256	2.51595	1	1	0.996986
GOTERM_BP_DIRECT	GO:0006351~transcription, DNA-templated	9	1.23626	0.0267435	NR4A2, SMAD4, THRB, RRAGC, GPBP1, RFX3, BAZ2A, CREBL2, CBFA2T3	682	101	19256	2.51595	1	1	0.996986
GOTERM_MF_DIRECT	GO:0070628~proteasome binding	4	0.549451	0.0269214	PSME4, SACS, PSMF1, RAD23B	697	18	18883	6.0204	1	0.533941	0.524326
GOTERM_BP_DIRECT	GO:0018105~peptidyl-serine phosphorylation	12	1.64835	0.0270309	CSNK1G3, CAMK2D, CAMK1D, PRKCE, CAMK4, CDK1, STK38L, MAPK1, RICTOR, PRKD1, STK4, HIPK2	682	160	19256	2.1176	1	1	0.996986
GOTERM_BP_DIRECT	GO:0007416~synapse assembly	7	0.961538	0.0270955	GPM6A, NRXN1, MAPT, ASIC2, SHANK3, SDK2, ADD2	682	65	19256	3.04065	1	1	0.996986
GOTERM_BP_DIRECT	GO:0036211~protein modification process	10	1.37363	0.0279094	CSNK1G3, PCMT1, YES1, PPP4R2, GGCX, PRKD3, ABL1, ST8SIA4, ABL2, PRKD1	682	121	19256	2.33344	1	1	0.996986
GOTERM_BP_DIRECT	GO:0007548~sex differentiation	4	0.549451	0.0279768	CNTFR, HNF4A, DMRTA1, PBX1	682	19	19256	5.94413	1	1	0.996986
GOTERM_BP_DIRECT	GO:0007605~sensory perception of sound	12	1.64835	0.0281265	GJC3, THRB, GRM7, FZD4, MYO6, KCNQ3, DCDC2, CACNA1D, LRIG2, SLC17A8, ASIC2, SOBP	682	161	19256	2.10444	1	1	0.996986
GOTERM_BP_DIRECT	GO:0060045~positive regulation of cardiac muscle cell proliferation	5	0.686813	0.0281492	MEF2C, NOTCH1, GATA6, CDK1, BMPR1A	682	33	19256	4.27797	1	1	0.996986
GOTERM_BP_DIRECT	GO:0003281~ventricular septum development	5	0.686813	0.0281492	HECTD1, LMO4, GJA5, MDM4, FRS2	682	33	19256	4.27797	1	1	0.996986
GOTERM_BP_DIRECT	GO:0048873~homeostasis of number of cells within a tissue	5	0.686813	0.0281492	NOTCH1, ILDR2, KRAS, GIGYF2, FOSL2	682	33	19256	4.27797	1	1	0.996986
GOTERM_BP_DIRECT	GO:0070371~ERK1 and ERK2 cascade	6	0.824176	0.0288823	MAP2K1, SMAD4, GRB10, CDK1, ABL1, MAPK1	682	49	19256	3.4573	1	1	0.996986
GOTERM_BP_DIRECT	GO:0010595~positive regulation of endothelial cell migration	7	0.961538	0.0289475	RRAS, ABL1, PRKD1, PROX1, FGF1, ETS1, FOXP1	682	66	19256	2.99458	1	1	0.996986
GOTERM_CC_DIRECT	GO:0071144~SMAD2-SMAD3 protein complex	3	0.412088	0.0292168	SMAD4, SMAD3, SMAD5	712	8	20521	10.8081	1	0.398843	0.382536
GOTERM_CC_DIRECT	GO:0036057~slit diaphragm	3	0.412088	0.0292168	PPP3CA, PODXL, MAGI2	712	8	20521	10.8081	1	0.398843	0.382536
GOTERM_MF_DIRECT	GO:0004725~protein tyrosine phosphatase activity	9	1.23626	0.0297864	PTPRT, MTMR3, EYA3, EYA4, PTPRM, PTPN4, CDC25A, PALD1, PTPRG	697	99	18883	2.46289	1	0.577025	0.566634
GOTERM_BP_DIRECT	GO:0097120~receptor localization to synapse	3	0.412088	0.0303515	MPP2, DLG3, NRXN1	682	8	19256	10.588	1	1	0.996986
GOTERM_BP_DIRECT	GO:2001259~positive regulation of cation channel activity	3	0.412088	0.0303515	STAC, ANK2, ANK3	682	8	19256	10.588	1	1	0.996986
GOTERM_BP_DIRECT	GO:0045656~negative regulation of monocyte differentiation	3	0.412088	0.0303515	CDK6, ZBTB46, HOXA7	682	8	19256	10.588	1	1	0.996986
GOTERM_BP_DIRECT	GO:0060509~Type I pneumocyte differentiation	3	0.412088	0.0303515	CREB1, THRB, KRAS	682	8	19256	10.588	1	1	0.996986
GOTERM_BP_DIRECT	GO:0007613~memory	8	1.0989	0.0307922	SLC24A2, ATXN1, CREB1, KCNK10, CRTC1, MAPT, SORCS3, SHANK3	682	85	19256	2.65737	1	1	0.996986
GOTERM_BP_DIRECT	GO:0030522~intracellular receptor signaling pathway	5	0.686813	0.0310381	NR4A2, NR4A3, HNF4A, RORA, RORB	682	34	19256	4.15215	1	1	0.996986
GOTERM_CC_DIRECT	GO:0008076~voltage-gated potassium channel complex	8	1.0989	0.0312631	CNTNAP2, KCNC1, KCND2, KCNB1, AMIGO1, KCNQ3, KCNA4, KCNQ5	712	87	20521	2.65026	1	0.417078	0.400026
GOTERM_BP_DIRECT	GO:0021954~central nervous system neuron development	4	0.549451	0.0320703	BRINP1, NOVA2, TAOK1, MAPT	682	20	19256	5.64692	1	1	0.996986
GOTERM_CC_DIRECT	GO:0016604~nuclear body	20	2.74725	0.0324917	AMER1, PLEKHH2, THRB, SATB1, PPP1R10, CRTC1, CELF3, NFATC1, STK4, DCAF7, HIPK2, GON4L, MCIDAS, ELF4, PAPOLG, RGS10, ABL1, MYH9, ERCC6, ARIH1	712	345	20521	1.67082	1	0.423837	0.406508
GOTERM_MF_DIRECT	GO:0070016~armadillo repeat domain binding	3	0.412088	0.0327715	CTNNBIP1, LEF1, STRN3	697	8	18883	10.1594	1	0.620423	0.609251
GOTERM_BP_DIRECT	GO:0030100~regulation of endocytosis	5	0.686813	0.034095	HIP1, ABL1, SNX12, ABL2, STON2	682	35	19256	4.03351	1	1	0.996986
GOTERM_BP_DIRECT	GO:0061564~axon development	5	0.686813	0.034095	DDR1, GRM7, PLP1, MAPT, CAMSAP2	682	35	19256	4.03351	1	1	0.996986
GOTERM_BP_DIRECT	GO:0016485~protein processing	8	1.0989	0.0343532	CPM, MMP16, CPD, DDI2, CASP2, ADAM10, ATG4B, ECE1	682	87	19256	2.59629	1	1	0.996986
GOTERM_BP_DIRECT	GO:0006397~mRNA processing	15	2.06044	0.0348214	KHDRBS1, RBM47, CNOT6L, CELF2, THOC2, A1CF, QKI, PTBP3, PPP4R2, PAPOLG, HABP4, RBM20, TARDBP, PPARGC1A, SRSF11	682	230	19256	1.84139	1	1	0.996986
GOTERM_BP_DIRECT	GO:0045948~positive regulation of translational initiation	4	0.549451	0.0364583	KHDRBS1, DDX3X, LARP1, HABP4	682	21	19256	5.37802	1	1	0.996986
GOTERM_BP_DIRECT	GO:0099072~regulation of postsynaptic specialization membrane neurotransmitter receptor levels	4	0.549451	0.0364583	DLG3, SLC9A6, PPFIA1, FLOT2	682	21	19256	5.37802	1	1	0.996986
GOTERM_BP_DIRECT	GO:0001649~osteoblast differentiation	10	1.37363	0.0364721	SYNCRIP, MEF2C, SMAD4, CBFB, CCDC47, LEF1, CLTC, SMAD5, BMPR1A, FOSL2	682	127	19256	2.2232	1	1	0.996986
GOTERM_BP_DIRECT	GO:0071300~cellular response to retinoic acid	7	0.961538	0.0371793	BRINP1, YES1, CREB1, FZD4, ABL2, RORB, KLF4	682	70	19256	2.82346	1	1	0.996986
GOTERM_BP_DIRECT	GO:0008283~cell proliferation	11	1.51099	0.0376234	RAP1B, DDR1, TBCK, NDST1, CNTNAP2, SMAD4, LARP1, FZD4, MAB21L1, CDC25A, HIPK2	682	148	19256	2.09852	1	1	0.996986
GOTERM_BP_DIRECT	GO:0051260~protein homooligomerization	10	1.37363	0.0380562	MPP2, KCNC1, KCND2, ALS2, KCNB1, KCTD21, PEG10, BEND3, KCNA4, MAPT	682	128	19256	2.20583	1	1	0.996986
GOTERM_BP_DIRECT	GO:0006198~cAMP catabolic process	3	0.412088	0.0381224	PDE10A, PDE4D, PDE7B	682	9	19256	9.41153	1	1	0.996986
GOTERM_BP_DIRECT	GO:0048617~embryonic foregut morphogenesis	3	0.412088	0.0381224	EPB41L5, SMAD3, ACVR2B	682	9	19256	9.41153	1	1	0.996986
GOTERM_BP_DIRECT	GO:0003254~regulation of membrane depolarization	3	0.412088	0.0381224	HCN3, CAMK2D, NEDD4L	682	9	19256	9.41153	1	1	0.996986
GOTERM_BP_DIRECT	GO:0010501~RNA secondary structure unwinding	3	0.412088	0.0381224	DDX3X, AGO4, AGO1	682	9	19256	9.41153	1	1	0.996986
GOTERM_BP_DIRECT	GO:0003283~atrial septum development	3	0.412088	0.0381224	GJA5, MDM4, ANK2	682	9	19256	9.41153	1	1	0.996986
GOTERM_BP_DIRECT	GO:2000650~negative regulation of sodium ion transmembrane transporter activity	3	0.412088	0.0381224	CAMK2D, PRKCE, NEDD4L	682	9	19256	9.41153	1	1	0.996986
GOTERM_MF_DIRECT	GO:0019888~protein phosphatase regulator activity	5	0.686813	0.0387938	PPP1R16B, PPP1R15B, PPP4R2, SHOC2, PPP2R3A	697	35	18883	3.87026	1	0.718116	0.705185
GOTERM_BP_DIRECT	GO:0003151~outflow tract morphogenesis	6	0.824176	0.038797	MEF2C, NOTCH1, GJA5, SOX11, PRICKLE1, BMPR1A	682	53	19256	3.19637	1	1	0.996986
GOTERM_CC_DIRECT	GO:0044233~ER-mitochondrion membrane contact site	4	0.549451	0.0390785	AHCYL1, TMX1, ACSL4, ZFYVE1	712	22	20521	5.2403	1	0.492537	0.472399
GOTERM_CC_DIRECT	GO:0030424~axon	20	2.74725	0.0394365	HCN3, CNTNAP2, SYT1, KCNB1, ADAM22, ADAM10, KCNA4, TANC2, ACTB, IGF1R, ALCAM, CALCR, GRM7, SCN9A, SACS, PPFIA1, CNTN2, MAPT, DIP2B, SLC38A2	712	353	20521	1.63295	1	0.492537	0.472399
GOTERM_BP_DIRECT	GO:0030335~positive regulation of cell migration	16	2.1978	0.0405877	PDGFRA, NOTCH1, SMAD3, FZD4, LEF1, ADAM10, FGF1, IGF1R, PPP3CA, FER, PODXL, PLP1, GCNT2, ITGA6, ZNF304, ZNF268	682	257	19256	1.7578	1	1	0.996986
GOTERM_BP_DIRECT	GO:0031333~negative regulation of protein complex assembly	5	0.686813	0.0407157	DDX3X, TRAF3IP1, LMO4, CTNNBIP1, SORL1	682	37	19256	3.81549	1	1	0.996986
GOTERM_BP_DIRECT	GO:0060412~ventricular septum morphogenesis	5	0.686813	0.0407157	SMAD4, NOTCH1, SOX11, PROX1, BMPR1A	682	37	19256	3.81549	1	1	0.996986
GOTERM_CC_DIRECT	GO:0032991~macromolecular complex	34	4.67033	0.0409944	KHDRBS1, NUFIP1, CRYBG3, NRXN1, ZC4H2, NPR3, CLTC, MTMR9, STK4, GIGYF2, ACTB, DCAF7, STRN3, RASSF2, TRPS1, GRB10, ABL1, PPFIA1, CASP2, MTA2, WASF1, PDGFRA, SMARCC1, MEF2C, MAGI2, ERLIN1, ACVR2B, SMAD5, NR4A2, FER, ALS2, MYH9, VCL, DGKH	712	692	20521	1.41609	1	0.501327	0.48083
GOTERM_MF_DIRECT	GO:0005516~calmodulin binding	14	1.92308	0.0434747	CAMK2D, CAMK1D, SYT1, CASK, ADD3, CAMSAP2, STRN3, ADD2, EEA1, PPP3CA, CAMK4, MYO6, KCNQ3, MYH9	697	207	18883	1.8323	1	0.771485	0.757593
GOTERM_MF_DIRECT	GO:0017124~SH3 domain binding	10	1.37363	0.0435292	KHDRBS1, FUT8, CNTNAP1, ARHGAP1, ABL1, ADAM10, MAPT, ARHGAP6, SHANK3, QKI	697	126	18883	2.15014	1	0.771485	0.757593
GOTERM_BP_DIRECT	GO:0016236~macroautophagy	7	0.961538	0.0442443	GABARAPL1, MTMR3, VPS4A, ATG4B, YOD1, KLHL3, ZFYVE1	682	73	19256	2.70743	1	1	0.996986
GOTERM_BP_DIRECT	GO:0098703~calcium ion import across plasma membrane	5	0.686813	0.0442801	SLC24A2, SCN9A, CACNA1A, CACNA1D, CACNA1E	682	38	19256	3.71508	1	1	0.996986
GOTERM_BP_DIRECT	GO:0032956~regulation of actin cytoskeleton organization	8	1.0989	0.04442	PDGFRA, TAOK1, DIXDC1, ABL1, ABL2, RICTOR, CELSR1, CORO2B	682	92	19256	2.45518	1	1	0.996986
GOTERM_BP_DIRECT	GO:0007157~heterophilic cell-cell adhesion via plasma membrane cell adhesion molecules	6	0.824176	0.0444428	ALCAM, TENM4, NRXN1, AMIGO1, FAT4, HMCN1	682	55	19256	3.08014	1	1	0.996986
GOTERM_BP_DIRECT	GO:0035176~social behavior	6	0.824176	0.0444428	CNTNAP2, BRINP1, ATXN1, GRID1, NRXN1, SHANK3	682	55	19256	3.08014	1	1	0.996986
GOTERM_BP_DIRECT	GO:0033674~positive regulation of kinase activity	6	0.824176	0.0444428	DDR1, PDGFRA, AXL, LMO4, MET, IGF1R	682	55	19256	3.08014	1	1	0.996986
GOTERM_BP_DIRECT	GO:0006487~protein N-linked glycosylation	6	0.824176	0.0444428	FUT8, ALG9, FUT9, MGAT4A, MGAT3, MOGS	682	55	19256	3.08014	1	1	0.996986
GOTERM_CC_DIRECT	GO:0005769~early endosome	18	2.47253	0.0449577	CNTNAP2, MAP2K1, RNF11, VPS4A, AP1B1, SNX12, ECE1, ANK2, CLCN3, SORL1, RAB21, EEA1, SLC9A6, ALS2, SNX16, AP1G1, NAPEPLD, MAPK1	712	312	20521	1.66279	1	0.538575	0.516555
GOTERM_BP_DIRECT	GO:0016567~protein ubiquitination	25	3.43407	0.0459326	PPP1R11, UHRF2, UBA6, RNF38, UBR3, NEDD4L, DCAF7, TRIM9, RNF213, HECTD1, OS9, KCTD21, ARIH1, DCAF10, BTRC, SKP1, WSB2, UBE2E1, KLHL3, SIRT1, APPBP2, GAN, RLIM, MDM4, ASB1	682	469	19256	1.50504	1	1	0.996986
GOTERM_BP_DIRECT	GO:0048589~developmental growth	4	0.549451	0.0461028	SMAD4, SMAD3, GAS1, BMPR1A	682	23	19256	4.91037	1	1	0.996986
GOTERM_BP_DIRECT	GO:0031123~RNA 3'-end processing	3	0.412088	0.0465563	LIN28B, LIN28A, PAPOLG	682	10	19256	8.47038	1	1	0.996986
GOTERM_BP_DIRECT	GO:0071875~adrenergic receptor signaling pathway	3	0.412088	0.0465563	AKAP13, PDE4D, ZDHHC21	682	10	19256	8.47038	1	1	0.996986
GOTERM_BP_DIRECT	GO:0043586~tongue development	3	0.412088	0.0465563	BNC2, SIX4, LEF1	682	10	19256	8.47038	1	1	0.996986
GOTERM_CC_DIRECT	GO:0045211~postsynaptic membrane	13	1.78571	0.0477694	HIP1, KCNC1, KCND2, KCNB1, GRID1, ZC4H2, GABRA3, ANK2, ANK3, NSG1, GRM7, CNTN2, SHANK3	712	201	20521	1.86409	1	0.560813	0.537884
GOTERM_BP_DIRECT	GO:0030073~insulin secretion	5	0.686813	0.0480137	SLC30A8, HNF4A, PRKCE, ILDR2, ACVR2B	682	39	19256	3.61982	1	1	0.996986
GOTERM_MF_DIRECT	GO:0004879~RNA polymerase II transcription factor activity, ligand-activated sequence-specific DNA binding	6	0.824176	0.0481664	NR4A2, THRB, NR4A3, HNF4A, RORA, RORB	697	54	18883	3.0102	1	0.825007	0.810151
GOTERM_BP_DIRECT	GO:0009952~anterior/posterior pattern specification	8	1.0989	0.0489261	CTNNBIP1, HOXA7, CELSR1, MLLT3, HOXC8, ACVR2B, PBX1, HIPK2	682	94	19256	2.40295	1	1	0.996986
GOTERM_BP_DIRECT	GO:0043484~regulation of RNA splicing	7	0.961538	0.0493897	ATXN7, RBM20, ILDR2, HNRNPH2, CCNL1, ATXN7L3, PTBP3	682	75	19256	2.63523	1	1	0.996986
GOTERM_BP_DIRECT	GO:0010468~regulation of gene expression	14	1.92308	0.0500283	TSHZ2, TET2, THOC2, PROX1, AFF4, AFF1, TAPBP, FOXP1, FUT8, CDK6, IGF2BP1, RICTOR, IGF2BP3, TARDBP	682	220	19256	1.79675	1	1	0.996986
GOTERM_CC_DIRECT	GO:0000502~proteasome complex	6	0.824176	0.050071	PSMD11, TXNL1, PSME4, PSMF1, PRICKLE1, RAD23B	712	58	20521	2.98155	1	0.574129	0.550655
GOTERM_MF_DIRECT	GO:0030957~Tat protein binding	3	0.412088	0.0501703	GABARAPL1, DLL1, ACTB	697	10	18883	8.12755	1	0.825007	0.810151
GOTERM_MF_DIRECT	GO:0001221~transcription cofactor binding	5	0.686813	0.0502144	ZNF618, HMGA1, RORA, KLF4, PBX1	697	38	18883	3.56471	1	0.825007	0.810151
GOTERM_MF_DIRECT	GO:0035091~phosphatidylinositol binding	9	1.23626	0.0505106	HIP1, SNX16, EXOC8, SH3PXD2A, SNX15, SNX12, ESYT3, MAPT, PITPNC1	697	110	18883	2.2166	1	0.825007	0.810151
GOTERM_CC_DIRECT	GO:0043025~neuronal cell body	20	2.74725	0.0508598	GPM6A, HCN3, CNTNAP2, KCND2, NRXN1, ZC4H2, CACNA1A, CACNA1E, SORL1, STRN3, IGF1R, SLC25A27, BRINP1, ALCAM, IGF2BP1, ABL1, MAPT, ASIC2, SLC38A2, BMPR1A	712	364	20521	1.58361	1	0.574129	0.550655
GOTERM_BP_DIRECT	GO:0050768~negative regulation of neurogenesis	4	0.549451	0.0513494	NOTCH1, BRINP1, SORL1, BMPR1A	682	24	19256	4.70577	1	1	0.996986
GOTERM_BP_DIRECT	GO:0097150~neuronal stem cell population maintenance	4	0.549451	0.0513494	NOTCH1, IGF2BP1, PROX1, DLL1	682	24	19256	4.70577	1	1	0.996986
GOTERM_MF_DIRECT	GO:0060090~binding, bridging	13	1.78571	0.0525267	OTUD4, RBPMS, SGTA, HMGA1, NFATC2, ADAM10, MLLT3, GIGYF2, TAPBP, AKAP13, RRAGC, RICTOR, VCL	697	192	18883	1.83434	1	0.841437	0.826285
GOTERM_BP_DIRECT	GO:0035725~sodium ion transmembrane transport	9	1.23626	0.0535843	SLC24A2, SLC4A7, HCN3, SLC4A8, SLC24A3, SCN9A, SLC17A8, ASIC2, SCN2B	682	116	19256	2.19062	1	1	0.996986
GOTERM_BP_DIRECT	GO:0000165~MAPK cascade	9	1.23626	0.0535843	MEF2C, MAP2K1, NRAS, MAP3K1, PRKCE, KRAS, ASH1L, SHANK3, MAPK4	682	116	19256	2.19062	1	1	0.996986
GOTERM_BP_DIRECT	GO:0035264~multicellular organism growth	8	1.0989	0.0537123	COL3A1, TBL1XR1, PLAG1, PRICKLE1, ERCC6, SLC25A25, GIGYF2, FOSL2	682	96	19256	2.35288	1	1	0.996986
GOTERM_BP_DIRECT	GO:0048511~rhythmic process	7	0.961538	0.0548879	TEF, CRTC1, HNF4A, CDK1, RORB, BTRC, TARDBP	682	77	19256	2.56678	1	1	0.996986
GOTERM_BP_DIRECT	GO:0042060~wound healing	7	0.961538	0.0548879	PDGFRA, PPP3CA, COL3A1, SMAD3, NFATC1, CELSR1, FGF1	682	77	19256	2.56678	1	1	0.996986
GOTERM_BP_DIRECT	GO:1901537~positive regulation of DNA demethylation	3	0.412088	0.0555967	OTUD4, SYNCRIP, A1CF	682	11	19256	7.70035	1	1	0.996986
GOTERM_BP_DIRECT	GO:0060020~Bergmann glial cell differentiation	3	0.412088	0.0555967	MAP2K1, ABL1, MAPK1	682	11	19256	7.70035	1	1	0.996986
GOTERM_BP_DIRECT	GO:0060563~neuroepithelial cell differentiation	3	0.412088	0.0555967	ABL1, SOX11, DLL1	682	11	19256	7.70035	1	1	0.996986
GOTERM_BP_DIRECT	GO:1902036~regulation of hematopoietic stem cell differentiation	3	0.412088	0.0555967	YTHDF2, CDK6, ABL1	682	11	19256	7.70035	1	1	0.996986
GOTERM_BP_DIRECT	GO:0070934~CRD-mediated mRNA stabilization	3	0.412088	0.0555967	SYNCRIP, IGF2BP1, IGF2BP3	682	11	19256	7.70035	1	1	0.996986
GOTERM_BP_DIRECT	GO:1902514~regulation of calcium ion transmembrane transport via high voltage-gated calcium channel	3	0.412088	0.0555967	CAMK2D, PDE4D, NOS1AP	682	11	19256	7.70035	1	1	0.996986
GOTERM_BP_DIRECT	GO:0051775~response to redox state	3	0.412088	0.0555967	FKBP1B, SLC7A11, CLOCK	682	11	19256	7.70035	1	1	0.996986
GOTERM_BP_DIRECT	GO:0042753~positive regulation of circadian rhythm	3	0.412088	0.0555967	RORA, BTRC, CLOCK	682	11	19256	7.70035	1	1	0.996986
GOTERM_BP_DIRECT	GO:0097484~dendrite extension	3	0.412088	0.0555967	AUTS2, SLC9A6, WASF1	682	11	19256	7.70035	1	1	0.996986
GOTERM_BP_DIRECT	GO:0007155~cell adhesion	28	3.84615	0.055932	DDR1, PTPRT, CNTNAP2, CNTNAP1, COL12A1, ADAM22, PTPRM, SLC7A11, HAPLN1, ALCAM, PODXL, FLOT2, ABL2, ITGB8, OPCML, PRKCE, LAMB4, CASK, MTSS1, FER, BCAM, PPFIBP1, CDH11, CNTN2, ITGA6, CD47, TLN2, VCL	682	551	19256	1.43479	1	1	0.996986
GOTERM_BP_DIRECT	GO:0031047~gene silencing by RNA	5	0.686813	0.0559859	DDX17, LIN28B, CNOT6L, AGO1, TNRC6B	682	41	19256	3.44324	1	1	0.996986
GOTERM_BP_DIRECT	GO:0008284~positive regulation of cell proliferation	26	3.57143	0.0562259	CNTFR, NOTCH1, FGF1, DLL1, ACTB, IGF1R, SLC25A27, GCNT2, E2F3, ZNF268, IL6R, PDGFRA, SMARCC1, MYOCD, CNOT6L, GLCE, GLP2R, ADAM10, NAP1L1, PROX1, PRLR, SIRT1, HIPK2, FER, MAB21L1, CD47	682	504	19256	1.45655	1	1	0.996986
GOTERM_MF_DIRECT	GO:0008331~high voltage-gated calcium channel activity	4	0.549451	0.0568052	SCN9A, CACNA1A, CACNA1D, CACNA1E	697	24	18883	4.5153	1	0.844389	0.829184
GOTERM_BP_DIRECT	GO:0060038~cardiac muscle cell proliferation	4	0.549451	0.0568712	NOTCH1, TENM4, GATA6, ABL1	682	25	19256	4.51754	1	1	0.996986
GOTERM_BP_DIRECT	GO:0014850~response to muscle activity	4	0.549451	0.0568712	FNDC5, NFATC1, SLC38A2, PPARGC1A	682	25	19256	4.51754	1	1	0.996986
GOTERM_BP_DIRECT	GO:0030325~adrenal gland development	4	0.549451	0.0568712	PDGFRA, SMAD4, SMAD3, PBX1	682	25	19256	4.51754	1	1	0.996986
GOTERM_BP_DIRECT	GO:0045332~phospholipid translocation	4	0.549451	0.0568712	ATP8B4, ABCC1, ATP11C, ATP10A	682	25	19256	4.51754	1	1	0.996986
GOTERM_BP_DIRECT	GO:0007266~Rho protein signal transduction	6	0.824176	0.0571352	RTKN, ARHGEF12, COL1A2, ARHGAP1, CELSR1, ARHGAP6	682	59	19256	2.87132	1	1	0.996986
GOTERM_BP_DIRECT	GO:0042475~odontogenesis of dentin-containing tooth	6	0.824176	0.0571352	PDGFRA, DLX3, LEF1, GATA6, ACVR2B, BMPR1A	682	59	19256	2.87132	1	1	0.996986
GOTERM_BP_DIRECT	GO:0032024~positive regulation of insulin secretion	6	0.824176	0.0571352	SLC30A8, PRKCE, NNAT, ACSL4, MYRIP, TARDBP	682	59	19256	2.87132	1	1	0.996986
GOTERM_CC_DIRECT	GO:0030175~filopodium	7	0.961538	0.058962	GPM6A, PODXL, MYO6, NOS1AP, IGF2BP1, ITGA6, PPP1R9A	712	80	20521	2.52189	1	0.653032	0.626332
GOTERM_MF_DIRECT	GO:0035254~glutamate receptor binding	3	0.412088	0.0598546	HIP1, PLCG1, PTPN4	697	11	18883	7.38868	1	0.844389	0.829184
GOTERM_MF_DIRECT	GO:0048407~platelet-derived growth factor binding	3	0.412088	0.0598546	PDGFRA, COL3A1, COL1A2	697	11	18883	7.38868	1	0.844389	0.829184
GOTERM_MF_DIRECT	GO:0008353~RNA polymerase II carboxy-terminal domain kinase activity	3	0.412088	0.0598546	CDK1, MAPK1, CDK13	697	11	18883	7.38868	1	0.844389	0.829184
GOTERM_MF_DIRECT	GO:0003680~AT DNA binding	3	0.412088	0.0598546	MEF2C, HMGA1, MAPT	697	11	18883	7.38868	1	0.844389	0.829184
GOTERM_BP_DIRECT	GO:0031175~neuron projection development	9	1.23626	0.060483	GPM6A, CNTNAP2, CLMN, NRXN1, PTPRM, MAPT, ERCC6, PPP1R9A, CAMSAP2	682	119	19256	2.13539	1	1	0.996986
GOTERM_BP_DIRECT	GO:0007275~multicellular organism development	7	0.961538	0.0607415	DDR1, PDGFRA, AXL, CDH11, GCNT2, MET, IGF1R	682	79	19256	2.5018	1	1	0.996986
GOTERM_MF_DIRECT	GO:0019003~GDP binding	7	0.961538	0.0612316	RAB21, RAP1B, NRAS, RRAGC, RRAS, KRAS, RAB9B	697	76	18883	2.4953	1	0.844389	0.829184
GOTERM_CC_DIRECT	GO:0005938~cell cortex	11	1.51099	0.0616267	AKAP13, FER, CLIP1, GRM7, MYO6, FLNB, HMCN1, PRKD1, CABP1, FGF1, ADD3	712	165	20521	1.92144	1	0.669905	0.642515
GOTERM_MF_DIRECT	GO:0019899~enzyme binding	21	2.88462	0.0618253	CNTNAP2, RBM47, YES1, NOTCH1, THRB, PRKCE, PDE4D, SNX12, HMGA1, ANK2, PHF6, SIRT1, PPP3CA, CREB1, VAPB, TRAF3, CASP2, PLCE1, MDM4, MAPT, IL6R	697	374	18883	1.5212	1	0.844389	0.829184
GOTERM_BP_DIRECT	GO:0050900~leukocyte migration	4	0.549451	0.0626616	YES1, MYH9, ITGA6, ADD2	682	26	19256	4.34379	1	1	0.996986
GOTERM_BP_DIRECT	GO:0022604~regulation of cell morphogenesis	4	0.549451	0.0626616	FMNL3, ZMYM4, AGO4, LARP4	682	26	19256	4.34379	1	1	0.996986
GOTERM_BP_DIRECT	GO:0010608~posttranscriptional regulation of gene expression	4	0.549451	0.0626616	EPB41L5, LARP1, GCNT2, LARP4	682	26	19256	4.34379	1	1	0.996986
GOTERM_MF_DIRECT	GO:0008157~protein phosphatase 1 binding	4	0.549451	0.0628477	FER, PPP1R11, PPP1R10, SHOC2	697	25	18883	4.33469	1	0.844389	0.829184
GOTERM_MF_DIRECT	GO:0070577~lysine-acetylated histone binding	4	0.549451	0.0628477	PSME4, BAZ2A, MLLT3, SIRT1	697	25	18883	4.33469	1	0.844389	0.829184
GOTERM_MF_DIRECT	GO:0070412~R-SMAD binding	4	0.549451	0.0628477	PPM1A, MYOCD, SMAD4, SMAD3	697	25	18883	4.33469	1	0.844389	0.829184
GOTERM_BP_DIRECT	GO:0050821~protein stabilization	14	1.92308	0.0642202	HIP1, SMAD3, MTMR9, CREBL2, ANK2, STK4, A1CF, RAB21, CREB1, RASSF2, CDC37L1, FLOT2, MDM4, PPARGC1A	682	229	19256	1.72613	1	1	0.996986
GOTERM_BP_DIRECT	GO:0045766~positive regulation of angiogenesis	11	1.51099	0.0643205	ANGPT2, RRAS, GATA6, ITGB8, ZNF304, PRKD1, PLCG1, FGF1, ETS1, SIRT1, HIPK2	682	163	19256	1.9054	1	1	0.996986
GOTERM_BP_DIRECT	GO:0032330~regulation of chondrocyte differentiation	3	0.412088	0.0651903	MAF, TRPS1, MBOAT2	682	12	19256	7.05865	1	1	0.996986
GOTERM_BP_DIRECT	GO:0060998~regulation of dendritic spine development	3	0.412088	0.0651903	MEF2C, CPEB3, TANC2	682	12	19256	7.05865	1	1	0.996986
GOTERM_BP_DIRECT	GO:0048680~positive regulation of axon regeneration	3	0.412088	0.0651903	STK24, FKBP1B, IGF1R	682	12	19256	7.05865	1	1	0.996986
GOTERM_BP_DIRECT	GO:0035022~positive regulation of Rac protein signal transduction	3	0.412088	0.0651903	AUTS2, ALS2, KRAS	682	12	19256	7.05865	1	1	0.996986
GOTERM_BP_DIRECT	GO:0007030~Golgi organization	9	1.23626	0.065378	RAB43, ARHGAP21, LMAN1, ATP8B4, UBXN2B, SURF4, GOLPH3L, TRAPPC8, PRKD1	682	121	19256	2.10009	1	1	0.996986
GOTERM_CC_DIRECT	GO:0032590~dendrite membrane	4	0.549451	0.0654385	MPP2, KCNC1, KCNB1, GABRA3	712	27	20521	4.26987	1	0.698407	0.669852
GOTERM_MF_DIRECT	GO:0008092~cytoskeletal protein binding	6	0.824176	0.0658401	EPB41L5, FRMD5, EPB41L1, ANK3, LIN7C, PTPN4	697	59	18883	2.7551	1	0.858916	0.843449
GOTERM_BP_DIRECT	GO:0030509~BMP signaling pathway	7	0.961538	0.0669514	SMAD4, DLX3, LEF1, ABL1, SMAD5, ACVR2B, BMPR1A	682	81	19256	2.44003	1	1	0.996986
GOTERM_BP_DIRECT	GO:0030324~lung development	7	0.961538	0.0669514	PDGFRA, COL3A1, NOTCH1, PROX1, FGF1, ACVR2B, BMPR1A	682	81	19256	2.44003	1	1	0.996986
GOTERM_BP_DIRECT	GO:0043087~regulation of GTPase activity	6	0.824176	0.0678826	FGD6, ALS2, CHN2, PLXNA2, TBC1D15, ARHGAP12	682	62	19256	2.73238	1	1	0.996986
GOTERM_MF_DIRECT	GO:0004714~transmembrane receptor protein tyrosine kinase activity	5	0.686813	0.0679936	DDR1, PDGFRA, AXL, MET, IGF1R	697	42	18883	3.22522	1	0.858916	0.843449
GOTERM_CC_DIRECT	GO:1990030~pericellular basket	2	0.274725	0.0680961	AMIGO1, SLC17A8	712	2	20521	28.8216	1	0.705698	0.676845
GOTERM_BP_DIRECT	GO:0008380~RNA splicing	13	1.78571	0.0683714	RBM47, CELF3, THOC2, QKI, PTBP3, SYNCRIP, PPP4R2, RRAGC, HABP4, RBM20, TARDBP, PPARGC1A, SRSF11	682	209	19256	1.75622	1	1	0.996986
GOTERM_BP_DIRECT	GO:0031116~positive regulation of microtubule polymerization	4	0.549451	0.0687134	CLIP1, NAV3, MAPT, MET	682	27	19256	4.1829	1	1	0.996986
GOTERM_MF_DIRECT	GO:0051018~protein kinase A binding	4	0.549451	0.0691743	AKAP13, CRYBG3, MYRIP, WASF1	697	26	18883	4.16797	1	0.858916	0.843449
GOTERM_MF_DIRECT	GO:0030507~spectrin binding	4	0.549451	0.0691743	ANK2, ANK3, ADD2, CAMSAP2	697	26	18883	4.16797	1	0.858916	0.843449
GOTERM_BP_DIRECT	GO:0072160~nephron tubule epithelial cell differentiation	2	0.274725	0.0694822	MEF2C, MTSS1	682	2	19256	28.2346	1	1	0.996986
GOTERM_BP_DIRECT	GO:0046619~optic placode formation involved in camera-type eye formation	2	0.274725	0.0694822	FRS2, PROX1	682	2	19256	28.2346	1	1	0.996986
GOTERM_BP_DIRECT	GO:0097117~guanylate kinase-associated protein clustering	2	0.274725	0.0694822	NRXN1, SHANK3	682	2	19256	28.2346	1	1	0.996986
GOTERM_BP_DIRECT	GO:0019074~viral RNA genome packaging	2	0.274725	0.0694822	DDX6, PC	682	2	19256	28.2346	1	1	0.996986
GOTERM_BP_DIRECT	GO:0051353~positive regulation of oxidoreductase activity	2	0.274725	0.0694822	ABL1, ABL2	682	2	19256	28.2346	1	1	0.996986
GOTERM_MF_DIRECT	GO:0099508~voltage-gated ion channel activity involved in regulation of presynaptic membrane potential	3	0.412088	0.0701156	KCNC1, KCNA4, KCNQ5	697	12	18883	6.77296	1	0.858916	0.843449
GOTERM_MF_DIRECT	GO:0035497~cAMP response element binding	3	0.412088	0.0701156	CREB1, NR4A3, CREB5	697	12	18883	6.77296	1	0.858916	0.843449
GOTERM_BP_DIRECT	GO:0001889~liver development	7	0.961538	0.0701899	UPF2, NOTCH1, SMAD3, HNF4A, GATA6, PROX1, MET	682	82	19256	2.41027	1	1	0.996986
GOTERM_CC_DIRECT	GO:0031965~nuclear membrane	15	2.06044	0.0713374	RANBP2, PHF20, NRXN1, SURF4, GATA6, PRICKLE1, SENP2, SCRN1, MYO6, NOS1AP, HABP4, ABL1, KPNA4, TNRC18, HOXA7	712	261	20521	1.65642	1	0.705698	0.676845
GOTERM_BP_DIRECT	GO:0042552~myelination	6	0.824176	0.0716974	GALC, MAP2K1, GJC3, AMIGO1, MAPK1, QKI	682	63	19256	2.68901	1	1	0.996986
GOTERM_CC_DIRECT	GO:0030121~AP-1 adaptor complex	3	0.412088	0.0726399	AFTPH, AP1G1, AP1B1	712	13	20521	6.65115	1	0.705698	0.676845
GOTERM_CC_DIRECT	GO:0044224~juxtaparanode region of axon	3	0.412088	0.0726399	MPP2, CNTNAP2, CNTN2	712	13	20521	6.65115	1	0.705698	0.676845
GOTERM_CC_DIRECT	GO:0014069~postsynaptic density	14	1.92308	0.0735446	MPP2, MAGI2, ADAM10, CABP1, PPP1R9A, ADD3, ADD2, ABHD17B, ALS2, HNRNPH2, CPEB3, SHANK3, GIT1, LZTS3	712	239	20521	1.6883	1	0.705698	0.676845
GOTERM_CC_DIRECT	GO:0010008~endosome membrane	16	2.1978	0.0740288	ATP6V1A, NOTCH1, VPS4A, ARHGAP1, ECE1, AQP4, ABHD17C, ARHGAP26, CLCN3, SORL1, WDR44, ARHGAP21, ABHD17B, SNX16, TRAF3, ITM2B	712	286	20521	1.6124	1	0.705698	0.676845
GOTERM_CC_DIRECT	GO:0016328~lateral plasma membrane	7	0.961538	0.0745371	SLC4A7, SLC4A8, ABCC1, KCNB1, ANK3, NSG1, LIN7C	712	85	20521	2.37355	1	0.705698	0.676845
GOTERM_BP_DIRECT	GO:0072583~clathrin-dependent endocytosis	4	0.549451	0.0750188	MAGI2, CLTC, STON2, DLL1	682	28	19256	4.03351	1	1	0.996986
GOTERM_BP_DIRECT	GO:0034063~stress granule assembly	4	0.549451	0.0750188	DDX6, YTHDF2, DDX3X, MAPT	682	28	19256	4.03351	1	1	0.996986
GOTERM_BP_DIRECT	GO:0010971~positive regulation of G2/M transition of mitotic cell cycle	4	0.549451	0.0750188	RCC2, CDK1, CDC25A, PBX1	682	28	19256	4.03351	1	1	0.996986
GOTERM_BP_DIRECT	GO:1990138~neuron projection extension	4	0.549451	0.0750188	DDR1, NRN1, ALCAM, PRICKLE1	682	28	19256	4.03351	1	1	0.996986
GOTERM_BP_DIRECT	GO:0051896~regulation of protein kinase B signaling	4	0.549451	0.0750188	PPP1R16B, RRAS, RICTOR, RASGRP1	682	28	19256	4.03351	1	1	0.996986
GOTERM_BP_DIRECT	GO:0006306~DNA methylation	4	0.549451	0.0750188	BEND3, BAZ2A, ARID4B, MTA2	682	28	19256	4.03351	1	1	0.996986
GOTERM_BP_DIRECT	GO:0007398~ectoderm development	3	0.412088	0.0752867	AMER2, EPB41L5, BMPR1A	682	13	19256	6.51568	1	1	0.996986
GOTERM_BP_DIRECT	GO:0009314~response to radiation	3	0.412088	0.0752867	COL3A1, CDC25A, POLH	682	13	19256	6.51568	1	1	0.996986
GOTERM_BP_DIRECT	GO:0010762~regulation of fibroblast migration	3	0.412088	0.0752867	FER, RCC2, MTA2	682	13	19256	6.51568	1	1	0.996986
GOTERM_BP_DIRECT	GO:0034333~adherens junction assembly	3	0.412088	0.0752867	FER, VCL, ACTB	682	13	19256	6.51568	1	1	0.996986
GOTERM_BP_DIRECT	GO:0031113~regulation of microtubule polymerization	3	0.412088	0.0752867	ABL1, MAPT, CAMSAP2	682	13	19256	6.51568	1	1	0.996986
GOTERM_CC_DIRECT	GO:0016363~nuclear matrix	9	1.23626	0.0798375	SMARCC1, ATXN1, NUFIP1, SATB1, ATXN7, SATB2, CASK, ACTB, DCAF7	712	129	20521	2.01081	1	0.743882	0.713468
GOTERM_MF_DIRECT	GO:0035259~glucocorticoid receptor binding	3	0.412088	0.0808977	NR4A2, SMAD3, NR4A3	697	13	18883	6.25196	1	0.954701	0.937509
GOTERM_MF_DIRECT	GO:0097157~pre-mRNA intronic binding	3	0.412088	0.0808977	RBPMS, RBM20, TARDBP	697	13	18883	6.25196	1	0.954701	0.937509
GOTERM_BP_DIRECT	GO:0032446~protein modification by small protein conjugation	4	0.549451	0.0815698	UBA6, UBE2E3, UBE2E1, KRAS	682	29	19256	3.89443	1	1	0.996986
GOTERM_BP_DIRECT	GO:0045070~positive regulation of viral genome replication	4	0.549451	0.0815698	NOTCH1, DDX3X, LARP1, VAPB	682	29	19256	3.89443	1	1	0.996986
GOTERM_CC_DIRECT	GO:0005923~bicellular tight junction	9	1.23626	0.0826387	CYTH2, DLG3, MAGI2, ILDR2, ANK3, AMOTL1, ASH1L, FRMD4B, LIN7C	712	130	20521	1.99534	1	0.748275	0.717681
GOTERM_CC_DIRECT	GO:1990531~Lem3p-Dnf1p complex	3	0.412088	0.0828584	ATP8B4, ATP11C, ATP10A	712	14	20521	6.17606	1	0.748275	0.717681
GOTERM_MF_DIRECT	GO:0019894~kinesin binding	5	0.686813	0.0831827	KCNC1, AP1G1, DCDC2, DCP1A, ACTB	697	45	18883	3.0102	1	0.954701	0.937509
GOTERM_MF_DIRECT	GO:0045296~cadherin binding	18	2.47253	0.0834667	PTPRT, DDX6, DDX3X, ARHGAP1, PTPRM, ANK3, GIGYF2, PCMT1, PPFIBP1, LARP1, STK24, VAPB, COBLL1, CDH11, MYH9, ITGA6, FLNB, VCL	697	320	18883	1.52391	1	0.954701	0.937509
GOTERM_BP_DIRECT	GO:0045739~positive regulation of DNA repair	5	0.686813	0.0838439	INO80D, EYA3, EYA4, ERCC6, SIRT1	682	47	19256	3.00368	1	1	0.996986
GOTERM_BP_DIRECT	GO:0097009~energy homeostasis	5	0.686813	0.0838439	NR4A3, CRTC1, DLL1, SIRT1, PPARGC1A	682	47	19256	3.00368	1	1	0.996986
GOTERM_BP_DIRECT	GO:0042100~B cell proliferation	5	0.686813	0.0838439	MEF2C, CR2, LEF1, RASGRP1, FOSL2	682	47	19256	3.00368	1	1	0.996986
GOTERM_MF_DIRECT	GO:0019901~protein kinase binding	25	3.43407	0.0842157	CLTC, GATA6, ACTB, STRN3, ADD2, SPRED1, TBC1D14, RICTOR, PLCG1, MAPK4, MAP3K1, SMAD3, RCC2, AP1B1, ADAM10, ANK2, PRLR, CDC25A, FRMD5, NR4A3, CCNE2, TRAF3, DCX, MAPT, CDK13	697	483	18883	1.40227	1	0.954701	0.937509
GOTERM_MF_DIRECT	GO:0030674~protein binding, bridging	9	1.23626	0.0848113	NUFIP1, COL1A2, PPP4R2, ANK2, ANK3, CDYL, PPP2R3A, MAPT, DCAF7	697	123	18883	1.98233	1	0.954701	0.937509
GOTERM_CC_DIRECT	GO:0005770~late endosome	10	1.37363	0.0850773	MAP2K1, SNX16, EXOC8, SLC9A6, MAGI2, VPS4A, MAPK1, NSG1, CLCN3, RAB9B	712	153	20521	1.88377	1	0.756672	0.725735
GOTERM_BP_DIRECT	GO:0090090~negative regulation of canonical Wnt signaling pathway	10	1.37363	0.0852542	AMER1, AMER2, SMAD4, NOTCH1, CTNNBIP1, PPP2R3A, PRICKLE1, STK4, MLLT3, BICC1	682	150	19256	1.88231	1	1	0.996986
GOTERM_BP_DIRECT	GO:0032228~regulation of synaptic transmission, GABAergic	3	0.412088	0.0858386	USP46, PLCL2, KRAS	682	14	19256	6.05027	1	1	0.996986
GOTERM_BP_DIRECT	GO:0035194~posttranscriptional gene silencing by RNA	3	0.412088	0.0858386	AGO4, AGO1, TSN	682	14	19256	6.05027	1	1	0.996986
GOTERM_BP_DIRECT	GO:0051152~positive regulation of smooth muscle cell differentiation	3	0.412088	0.0858386	MYOCD, NOTCH1, SIRT1	682	14	19256	6.05027	1	1	0.996986
GOTERM_BP_DIRECT	GO:0033120~positive regulation of RNA splicing	3	0.412088	0.0858386	HABP4, RBM20, SLC38A2	682	14	19256	6.05027	1	1	0.996986
GOTERM_BP_DIRECT	GO:0051279~regulation of release of sequestered calcium ion into cytosol	3	0.412088	0.0858386	PRKCE, ANK2, PRKD1	682	14	19256	6.05027	1	1	0.996986
GOTERM_BP_DIRECT	GO:0022010~central nervous system myelination	3	0.412088	0.0858386	CNTNAP1, MYRF, PLP1	682	14	19256	6.05027	1	1	0.996986
GOTERM_BP_DIRECT	GO:0070102~interleukin-6-mediated signaling pathway	3	0.412088	0.0858386	FER, SMAD4, IL6R	682	14	19256	6.05027	1	1	0.996986
GOTERM_BP_DIRECT	GO:0038083~peptidyl-tyrosine autophosphorylation	3	0.412088	0.0858386	DDR1, ABL1, IGF1R	682	14	19256	6.05027	1	1	0.996986
GOTERM_BP_DIRECT	GO:0016525~negative regulation of angiogenesis	9	1.23626	0.0873489	SPRED1, ANGPT2, AGO1, FOXJ2, PTPRM, VASH1, KLF4, SULF1, QKI	682	129	19256	1.96986	1	1	0.996986
GOTERM_CC_DIRECT	GO:0048471~perinuclear region of cytoplasm	34	4.67033	0.0879529	VPS4A, ARHGAP1, PTPRM, MTMR9, ECE1, CABP1, ZFYVE1, WDR44, ARHGAP21, CAPN6, AP1G1, MYO6, IGF2BP1, ABL1, FLOT2, PSMF1, PPP1R16B, UPF2, TPD52, EXOC8, KCNB1, PRKCE, PDE4D, MAGI2, NFATC1, MYRIP, PER2, AFTPH, DAAM1, TAOK1, NOS1AP, PRKD1, PDE7B, CPEB3	712	745	20521	1.31535	1	0.770573	0.739067
GOTERM_BP_DIRECT	GO:0048701~embryonic cranial skeleton morphogenesis	4	0.549451	0.088358	PDGFRA, SMAD3, MMP16, SIX4	682	30	19256	3.76461	1	1	0.996986
GOTERM_BP_DIRECT	GO:0007026~negative regulation of microtubule depolymerization	4	0.549451	0.088358	NAV3, ATXN7, TAOK1, CAMSAP2	682	30	19256	3.76461	1	1	0.996986
GOTERM_BP_DIRECT	GO:0031032~actomyosin structure organization	4	0.549451	0.088358	EPB41L5, FRMD5, EPB41L1, MYH9	682	30	19256	3.76461	1	1	0.996986
GOTERM_MF_DIRECT	GO:0032266~phosphatidylinositol-3-phosphate binding	5	0.686813	0.0885855	HIP1, SH3PXD2A, SNX12, ZFYVE1, ATG2B	697	46	18883	2.94476	1	0.959499	0.942221
GOTERM_BP_DIRECT	GO:0035914~skeletal muscle cell differentiation	5	0.686813	0.0890402	NOTCH1, KRAS, SOX11, ANKRD52, FOXN2	682	48	19256	2.9411	1	1	0.996986
GOTERM_BP_DIRECT	GO:0007173~epidermal growth factor receptor signaling pathway	5	0.686813	0.0890402	ABL1, ABL2, PLCE1, PLCG1, PRICKLE1	682	48	19256	2.9411	1	1	0.996986
GOTERM_BP_DIRECT	GO:0034446~substrate adhesion-dependent cell spreading	5	0.686813	0.0890402	FER, FZD4, PEAK1, AXL, ABL1	682	48	19256	2.9411	1	1	0.996986
GOTERM_BP_DIRECT	GO:0050885~neuromuscular process controlling balance	5	0.686813	0.0890402	CNTNAP1, NRXN1, ABL1, SHANK3, GIGYF2	682	48	19256	2.9411	1	1	0.996986
GOTERM_MF_DIRECT	GO:0031490~chromatin DNA binding	7	0.961538	0.0896063	TOX3, NOTCH1, SMAD3, THRB, KLF4, CLOCK, PPARGC1A	697	84	18883	2.25765	1	0.959499	0.942221
GOTERM_MF_DIRECT	GO:0004693~cyclin-dependent protein serine/threonine kinase activity	4	0.549451	0.0897686	CDK17, CDK6, CDK1, CDK13	697	29	18883	3.7368	1	0.959499	0.942221
GOTERM_MF_DIRECT	GO:0003682~chromatin binding	25	3.43407	0.0899786	DLX3, SATB2, LEF1, GATA6, MLLT3, MBTD1, ING5, NSD1, HNF4A, TNRC18, MTA2, SMARCC1, SMAD4, AUTS2, SFMBT1, HMGA1, NFATC2, NAP1L1, CDYL, ASH1L, FOSL2, TOX3, CDK1, ERCC6, ERG	697	487	18883	1.39075	1	0.959499	0.942221
GOTERM_CC_DIRECT	GO:0005778~peroxisomal membrane	6	0.824176	0.0908005	FNDC5, PEX5L, ACSL1, AGPS, ACSL4, FAR1	712	69	20521	2.50623	1	0.783822	0.751775
GOTERM_MF_DIRECT	GO:0044548~S100 protein binding	3	0.412088	0.0921488	CACYBP, FGF1, KCNK3	697	14	18883	5.80539	1	0.959499	0.942221
GOTERM_MF_DIRECT	GO:1990247~N6-methyladenosine-containing RNA binding	3	0.412088	0.0921488	YTHDF2, IGF2BP1, IGF2BP3	697	14	18883	5.80539	1	0.959499	0.942221
GOTERM_BP_DIRECT	GO:0007368~determination of left/right symmetry	6	0.824176	0.0924807	NOTCH1, KIF3B, AP1B1, DLL1, ACVR2B, BICC1	682	68	19256	2.49129	1	1	0.996986
GOTERM_BP_DIRECT	GO:0030534~adult behavior	4	0.549451	0.0953746	CNTNAP2, NRXN1, SLC7A11, SHANK3	682	31	19256	3.64317	1	1	0.996986
GOTERM_BP_DIRECT	GO:0001578~microtubule bundle formation	4	0.549451	0.0953746	CLIP1, CAPN6, NAV1, MARK4	682	31	19256	3.64317	1	1	0.996986
GOTERM_BP_DIRECT	GO:0042327~positive regulation of phosphorylation	4	0.549451	0.0953746	PDGFRA, GRB10, ITGA6, PPARGC1B	682	31	19256	3.64317	1	1	0.996986
GOTERM_BP_DIRECT	GO:0090102~cochlea development	4	0.549451	0.0953746	ADAM10, SLC17A8, SOBP, KCNK3	682	31	19256	3.64317	1	1	0.996986
GOTERM_BP_DIRECT	GO:0045930~negative regulation of mitotic cell cycle	4	0.549451	0.0953746	BRINP1, ABL1, GAS1, DGKZ	682	31	19256	3.64317	1	1	0.996986
GOTERM_BP_DIRECT	GO:0030878~thyroid gland development	4	0.549451	0.0953746	MAP2K1, SMAD3, MAPK1, HIPK2	682	31	19256	3.64317	1	1	0.996986
GOTERM_BP_DIRECT	GO:2000767~positive regulation of cytoplasmic translation	3	0.412088	0.0968012	SYNCRIP, LIN28A, IGF2BP1	682	15	19256	5.64692	1	1	0.996986
GOTERM_BP_DIRECT	GO:0003407~neural retina development	3	0.412088	0.0968012	GPM6A, CASP2, SLC17A8	682	15	19256	5.64692	1	1	0.996986
GOTERM_BP_DIRECT	GO:0070306~lens fiber cell differentiation	3	0.412088	0.0968012	SMAD3, MAF, SLC7A11	682	15	19256	5.64692	1	1	0.996986
GOTERM_BP_DIRECT	GO:0022408~negative regulation of cell-cell adhesion	3	0.412088	0.0968012	EPB41L5, PODXL, ABL1	682	15	19256	5.64692	1	1	0.996986
GOTERM_BP_DIRECT	GO:0014898~cardiac muscle hypertrophy in response to stress	3	0.412088	0.0968012	PPP3CA, SMAD4, GATA6	682	15	19256	5.64692	1	1	0.996986
GOTERM_BP_DIRECT	GO:0033173~calcineurin-NFAT signaling cascade	3	0.412088	0.0968012	PPP3CA, NFATC2, NFATC1	682	15	19256	5.64692	1	1	0.996986
GOTERM_BP_DIRECT	GO:0008286~insulin receptor signaling pathway	6	0.824176	0.0969717	FER, SMARCC1, GRB10, MAPK1, SOS2, IGF1R	682	69	19256	2.45518	1	1	0.996986
GOTERM_MF_DIRECT	GO:0008143~poly(A) binding	4	0.549451	0.0971396	KHDRBS1, DDX3X, RBPMS, LARP4	697	30	18883	3.61224	1	0.998979	0.98099
GOTERM_CC_DIRECT	GO:0042734~presynaptic membrane	9	1.23626	0.0975029	SLC4A8, HIP1, RIMS3, KCNC1, SYT1, NRXN1, CASK, KCNQ5, ZDHHC17	712	135	20521	1.92144	1	0.791091	0.758746
GOTERM_CC_DIRECT	GO:0000151~ubiquitin ligase complex	8	1.0989	0.0977625	RNF11, RMND5A, TRAF3, RANBP10, UBE2E1, UBR3, ARIH1, ASB1	712	113	20521	2.04047	1	0.791091	0.758746
GOTERM_BP_DIRECT	GO:0016311~dephosphorylation	8	1.0989	0.0986965	PTPRT, PPM1A, PPP3CA, MTMR3, PTPRM, PTPN4, TNS3, PTPRG	682	111	19256	2.03493	1	1	0.996986
GOTERM_CC_DIRECT	GO:0043204~perikaryon	10	1.37363	0.0989069	MPP2, CNTNAP2, RCVRN, KCND2, KCNB1, DMWD, AMIGO1, SLC17A8, DIP2B, GIGYF2	712	158	20521	1.82415	1	0.791091	0.758746
GOTERM_BP_DIRECT	GO:0071277~cellular response to calcium ion	7	0.961538	0.0992681	MEF2C, CAMK2D, SYT1, KCNB1, NRXN1, KCNQ3, NFATC2	682	90	19256	2.19602	1	1	0.996986

## Sheet: GO Term BP
Category	Term	Count	%	PValue	Genes	List Total	Pop Hits	Pop Total	Fold Enrichment	Bonferroni	Benjamini	FDR
GOTERM_BP_DIRECT	GO:0045944~positive regulation of transcription from RNA polymerase II promoter	97	13.3242	1.44942e-13	CRTC1, UBP1, ARID4B, RORA, RORB, FGF1, BACH1, ETS1, MCIDAS, GPBP1, POGZ, HOXA7, DDX17, MEF2C, SMARCC1, LMO4, SERPINF2, UBE2E1, RFX3, CASK, SOX11, PYGO1, MYCN, MAF, TBL1XR1, ERG, PRKD1, CLOCK, DLX3, NOTCH1, CBFB, GATA6, ABL1, ZNF304, ZNF148, ZNF544, ZNF268, PPARGC1A, PPARGC1B, SMAD4, POU2F1, YES1, SMAD3, AUTS2, HMGA1, NFATC2, NFATC1, TRERF1, SMAD5, PBX1, FOSL2, NR4A2, NR4A3, AGO1, CDK13, BMPR1A, C…	682	1230	19256	2.22663	4.81239e-10	4.81063e-10	4.79469e-10
GOTERM_BP_DIRECT	GO:0006357~regulation of transcription from RNA polymerase II promoter	101	13.8736	1.27593e-08	ZNF570, UBP1, ARID4B, RORA, RORB, BACH1, ETS1, ACTB, HOXA7, CCNL1, ATXN7L3, DDX17, SMARCC1, ZFP1, ZFP2, EBF1, RFX3, FOXP1, MYCN, MAF, TBL1XR1, ZNF439, ERG, ZNF710, CLOCK, ZNF275, DLX3, NOTCH1, CBFB, TSHZ2, CREBL2, ATXN7, ZNF704, ZKSCAN8, ZNF547, ZNF304, ZNF148, ZNF544, ZNF268, HOXC8, SMAD4, POU2F1, SMAD3, BRPF3, NFATC2, NFATC1, FOXN3, FOXN2, TRERF1, ZFHX4, SMAD5, PBX1, FOSL2, NR4A2, NR4A3, CDK1, …	682	1599	19256	1.78342	4.23471e-05	2.1174e-05	2.11038e-05
GOTERM_BP_DIRECT	GO:0045893~positive regulation of transcription, DNA-templated	53	7.28022	8.14624e-07	PHF20, RORA, RORB, ETS1, ACTB, SIX4, HNF4A, GPBP1, BTRC, ATXN7L3, SMARCC1, MYOCD, MAP2K1, MEF2C, ZNF281, RFX3, PPM1A, ELF1, MYCN, CREB1, ELF4, TBL1XR1, CLOCK, CREB5, INO80D, NOTCH1, MYRF, LEF1, GATA6, CREBL2, MLLT3, MBTD1, ATXN7, NSD1, MTA2, E2F5, PPARGC1A, SMAD4, SMAD3, RBPMS, FZD4, FOXJ2, HMGA1, NFATC2, NFATC1, KLF4, TRERF1, SMAD5, HIPK2, PER2, NFIC, CAMK4, CRLF3	682	718	19256	2.08417	0.00270009	0.000901245	0.000898258
GOTERM_BP_DIRECT	GO:0006468~protein phosphorylation	31	4.25824	3.5984e-05	CAMK2D, STK4, NUAK2, ABL1, MAPK1, ABL2, STK38L, MARK4, MAPK4, CDK17, MAP2K1, EPHA7, YES1, MAP3K1, PRKCE, ADAM10, ACVR2B, HIPK2, FER, CREB1, CDK6, STK24, PRKD3, PEAK1, TAOK1, CAMK4, CDK1, ERG, CDK13, FRK, BMPR1A	682	379	19256	2.30943	0.112576	0.0298577	0.0297587
GOTERM_BP_DIRECT	GO:0007165~signal transduction	71	9.75275	9.14541e-05	PTPRT, CNTFR, CNTNAP1, RTKN, TENM4, ARHGAP1, PTPRM, FGF1, ARHGAP6, PITPNC1, IGF1R, IPO8, RASSF2, ALCAM, RASSF3, RASSF5, TAGAP, PPFIA1, GRB10, BTRC, CSNK1G3, MAP2K1, KCNK10, PDE4D, PRKCE, MAGI2, LRRC40, ANK2, ANK3, FNDC5, BCAM, CREB1, TRAF3, ERG, PRKD1, MET, CLOCK, NRXN1, NPR3, GPR85, CREBL2, STK4, RASGRP1, ARHGAP12, RAP1B, ARHGAP21, NRAS, CHN2, ABL2, MAPK1, FLNB, SHOC2, LRRC8B, SRGAP1, PAG1, RCVR…	682	1251	19256	1.60244	0.261807	0.0607072	0.060506
GOTERM_BP_DIRECT	GO:0010629~negative regulation of gene expression	26	3.57143	0.000130945	SLC24A3, NOTCH1, DDX3X, PLAG1, NRXN1, SNX12, PPP3CA, FLOT2, ITGB8, DIP2A, ZNF148, MEF2C, SMAD3, ZNF281, ADAM10, SOX11, KLF4, SIRT1, SMAD5, FOXP1, MYCN, PC, CDK1, MAPT, TARDBP, BMPR1A	682	312	19256	2.35288	0.352499	0.0724345	0.0721944
GOTERM_BP_DIRECT	GO:0006355~regulation of transcription, DNA-templated	57	7.82967	0.000233641	ZNF570, BNC2, PHF20, HP1BP3, RORA, RORB, BACH1, ING5, GPBP1, ZNF329, ZNF687, MEF2C, TGIF2, ZFP1, SFMBT1, ZNF282, ZNF281, RFX3, ASH1L, PROX1, MN1, TFEC, ZNF439, CLOCK, NOTCH1, PLAG1, IGSF1, BAZ2A, CREBL2, MLLT3, MBTD1, ZNF627, NSD1, ZKSCAN8, ABL1, ZNF547, ZNF304, ZNF544, PPARGC1A, ZNF268, PPARGC1B, ZNF584, ZNF583, SMAD4, SMAD3, BRPF3, CEP350, HMGA1, NFATC2, FOXN3, FOXN2, ACVR2B, SMAD5, GON4L, ZNF6…	682	972	19256	1.65573	0.539547	0.0823909	0.0821178
GOTERM_BP_DIRECT	GO:0007399~nervous system development	31	4.25824	0.000246075	CNTFR, NUMBL, NRN1, C3ORF70, ZC4H2, PPP1R9A, ATXN1, DPYSL4, IGF2BP1, ST8SIA4, IGF2BP3, DIP2B, MARK4, SMARCC1, MEF2C, CAMK1D, TMOD2, MAGI2, NAP1L1, NAV1, SOX11, ARHGAP26, NAV3, AXL, SPRY3, DCX, PRKD1, MET, ITM2B, NAIP, SCN2B	682	422	19256	2.07411	0.558166	0.0823909	0.0821178
GOTERM_BP_DIRECT	GO:0001525~angiogenesis	22	3.02198	0.000259622	PANK2, NOTCH1, ANGPT2, FZD4, NRXN1, NPR3, UBP1, RORA, VASH1, TSPAN12, FGF1, SIRT1, FMNL3, RNF213, GJA5, MYH9, ZNF304, CD47, PRKD1, AMOTL1, HOXA7, BMPR1A	682	252	19256	2.46493	0.577598	0.0823909	0.0821178
GOTERM_BP_DIRECT	GO:0030036~actin cytoskeleton organization	20	2.74725	0.000269927	AUTS2, ARHGAP26, CORO2B, MTSS1, ADD2, FMNL3, CYTH2, TBCK, FER, FGD6, NUAK2, DAAM1, ABL1, MYH9, KRAS, FLNB, RICTOR, HMCN1, AMOTL1, WASF1	682	217	19256	2.60227	0.591804	0.0823909	0.0821178
GOTERM_BP_DIRECT	GO:0010628~positive regulation of gene expression	35	4.80769	0.000273064	SLC24A3, NOTCH1, DDX3X, PLAG1, NRXN1, LEF1, FGF1, ETS1, DLL1, PPP3CA, CALCR, ITGB8, SLC38A2, PPARGC1A, MYOCD, MAP2K1, MEF2C, SMAD4, SMAD3, NFATC2, SOX11, ANK2, ANK3, KLF4, QKI, MYCN, CDK6, MAF, NOS1AP, CDK1, PLP1, KRAS, PRKD1, ERCC6, BMPR1A	682	505	19256	1.95685	0.596034	0.0823909	0.0821178
GOTERM_BP_DIRECT	GO:0045892~negative regulation of transcription, DNA-templated	38	5.21978	0.000323873	CREBZF, KHDRBS1, NOTCH1, LEF1, GATA6, RORB, PRICKLE1, STRN3, MBTD1, ATXN1, SIX4, HNF4A, MTA2, HOXA7, ZNF148, BTRC, PPARGC1B, SPEN, SMAD4, POU2F1, SFMBT1, ZNF282, ZNF281, HMGA1, RFX3, CDYL, FOXN3, PROX1, KLF4, TRERF1, CBFA2T3, SIRT1, FOXP1, PER2, HIC2, RLIM, MDM4, CLOCK	682	572	19256	1.87573	0.65874	0.0895779	0.0892811
GOTERM_BP_DIRECT	GO:0000122~negative regulation of transcription from RNA polymerase II promoter	58	7.96703	0.000355667	THRB, ARID4B, BACH1, PHF6, TRPS1, HOXA7, KLF12, MYOCD, MEF2C, TGIF2, LMO4, ZNF281, TET1, SOX11, PROX1, SIRT1, FOXP1, HIC2, PPM1A, MAF, TBL1XR1, TFEC, ZNF439, KHDRBS1, NOTCH1, CBFB, ZBTB46, SATB1, SATB2, LEF1, GATA6, STRN3, PURB, ATXN1, NSD1, BEND3, ZNF304, MTA2, ZNF148, HOXC8, ZNF268, SPEN, SMAD4, SMAD3, NFATC2, KLF4, ACVR2B, SMAD5, HIPK2, PER2, NR4A2, NR4A3, CDK6, NFIC, RLIM, MDM4, CPEB3, FRK	682	1011	19256	1.61979	0.692927	0.0908045	0.0905035
GOTERM_BP_DIRECT	GO:0009653~anatomical structure morphogenesis	15	2.06044	0.000556663	TPD52, CPM, SMAD4, SMAD3, EYA3, EYA4, GATA6, SOX11, FGF1, SMAD5, PTBP3, SIX4, MAB21L1, IGF2BP3, NFE2L1	682	143	19256	2.96167	0.84246	0.123171	0.122763
GOTERM_BP_DIRECT	GO:0010467~gene expression	15	2.06044	0.000556663	DLX3, ANGPT2, GATA6, KLHL3, PRICKLE1, MLLT3, HIPK2, FOSL2, GRB10, KCNQ3, RHO, KPNA4, KRAS, SHANK3, SCN2B	682	143	19256	2.96167	0.84246	0.123171	0.122763
GOTERM_BP_DIRECT	GO:0017148~negative regulation of translation	12	1.64835	0.000628012	DDX6, SYNCRIP, DDX3X, LARP1, LIN28A, TRIM2, CAPRIN1, IGF2BP1, IGF2BP3, CPEB3, QKI, GIGYF2	682	97	19256	3.49294	0.875696	0.130273	0.129842
GOTERM_BP_DIRECT	GO:0001764~neuron migration	13	1.78571	0.000770788	GPM6A, MEF2C, AUTS2, SATB2, CEP85L, DCDC2, NAV1, CELSR1, NR4A2, COL3A1, AXL, DCX, MATN2	682	115	19256	3.19174	0.922636	0.150485	0.149986
GOTERM_BP_DIRECT	GO:0045669~positive regulation of osteoblast differentiation	10	1.37363	0.00169745	PPP3CA, MEF2C, CTNNBIP1, SUCO, SOX11, PRKD1, IL6R, SMAD5, ACVR2B, BMPR1A	682	78	19256	3.61982	0.996442	0.302962	0.301958
GOTERM_BP_DIRECT	GO:0050804~modulation of synaptic transmission	10	1.37363	0.00185693	NTNG1, SLC4A8, PPP3CA, EPHA7, GRID1, CDH11, CACNA1A, PLCG1, SLC7A11, PPP1R9A	682	79	19256	3.574	0.997906	0.302962	0.301958
GOTERM_BP_DIRECT	GO:0007229~integrin-mediated signaling pathway	12	1.64835	0.00191691	COL3A1, FUT8, RCC2, ADAM22, ABL1, ITGB8, MYH9, ADAM10, ITGA6, ZNF304, CD47, PRKD1	682	111	19256	3.05239	0.998285	0.302962	0.301958
GOTERM_BP_DIRECT	GO:0007169~transmembrane receptor protein tyrosine kinase signaling pathway	12	1.64835	0.00191691	PTPRT, DDR1, PDGFRA, YES1, AXL, SAMD12, MET, MPZL1, FRK, MTSS1, PTPRG, IGF1R	682	111	19256	3.05239	0.998285	0.302962	0.301958
GOTERM_BP_DIRECT	GO:0006366~transcription from RNA polymerase II promoter	19	2.60989	0.0023991	GTF2A1, MYOCD, SMAD4, NOTCH1, MYEF2, CBFB, LEF1, NFATC2, ARID4B, PROX1, ASH1L, KLF4, ETS1, NR4A2, MAF, HNF4A, NFIC, TBPL1, ERCC6	682	241	19256	2.22596	0.999655	0.335751	0.334638
GOTERM_BP_DIRECT	GO:0042752~regulation of circadian rhythm	9	1.23626	0.00243362	PER2, HNF4A, CDK1, RORB, PROX1, BTRC, TARDBP, CLOCK, PPARGC1A	682	67	19256	3.79271	0.999692	0.335751	0.334638
GOTERM_BP_DIRECT	GO:0000082~G1/S transition of mitotic cell cycle	9	1.23626	0.00243362	KHDRBS1, PPP6C, PPP3CA, CDK6, CCNE2, CDK1, E2F3, BCAT1, CDC25A	682	67	19256	3.79271	0.999692	0.335751	0.334638
GOTERM_BP_DIRECT	GO:0051726~regulation of cell cycle	19	2.60989	0.00262336	CDK17, INO80D, UHRF2, VASH1, ACTB, HIPK2, PER2, MBTD1, ING5, PPM1A, CDK6, ABL1, MDM4, HBP1, TARDBP, CDK13, BTRC, CCNL1, ZNF268	682	243	19256	2.20764	0.999836	0.335751	0.334638
GOTERM_BP_DIRECT	GO:0007010~cytoskeleton organization	14	1.92308	0.0027739	CNTNAP1, ANK2, ANK3, LARP4, ADD3, FMNL3, ARHGAP21, FGD6, GAN, ZMYM4, RANBP10, RICTOR, TLN2, BRWD3	682	151	19256	2.61778	0.999901	0.335751	0.334638
GOTERM_BP_DIRECT	GO:0016310~phosphorylation	37	5.08242	0.0028288	PANK2, CAMK2D, STK4, PAPSS2, IGF1R, AKAP1, AKAP13, NUAK2, ABL1, MAPK1, MAPK4, GIT1, CDK17, CSNK1G3, MAP2K1, RPS6KL1, EPHA7, CAMK1D, YES1, PRKCE, MAGI2, CASK, DGKZ, ACVR2B, HIPK2, FER, STK24, PRKD3, AXL, TAOK1, CAMK4, PRKD1, CDK13, MET, FRK, DGKH, BMPR1A	682	623	19256	1.67685	0.999917	0.335751	0.334638
GOTERM_BP_DIRECT	GO:0007179~transforming growth factor beta receptor signaling pathway	11	1.51099	0.00283584	COL3A1, FUT8, SMAD4, SMAD3, COL1A2, GCNT2, ITGB8, SIRT1, SMAD5, BMPR1A, HIPK2	682	100	19256	3.10581	0.999919	0.335751	0.334638
GOTERM_BP_DIRECT	GO:0071560~cellular response to transforming growth factor beta stimulus	9	1.23626	0.00293365	EPB41L5, PPM1A, MEF2C, SMAD4, YES1, SMAD3, ABL1, NFATC1, IGF1R	682	69	19256	3.68277	0.999942	0.335751	0.334638
GOTERM_BP_DIRECT	GO:0010812~negative regulation of cell-substrate adhesion	5	0.686813	0.00319312	NOTCH1, ANGPT2, FZD4, GCNT2, CORO2B	682	18	19256	7.84295	0.999975	0.353265	0.352094
GOTERM_BP_DIRECT	GO:0006511~ubiquitin-dependent protein catabolic process	18	2.47253	0.0037972	RNF11, PSMD11, PPP1R11, UBA6, UBE2E1, UBR3, NEDD4L, KLHL3, HECTD1, RNF213, OS9, KCTD21, RLIM, RNF150, PSMF1, ARIH1, BTRC, SKP1	682	232	19256	2.19062	0.999997	0.406545	0.405197
GOTERM_BP_DIRECT	GO:0048699~generation of neurons	4	0.549451	0.00438679	CDK6, SIX4, THOC2, MAPT	682	10	19256	11.2938	1	0.454992	0.453484
GOTERM_BP_DIRECT	GO:0000381~regulation of alternative mRNA splicing, via spliceosome	8	1.0989	0.00464019	DDX17, KHDRBS1, RBM47, RBPMS, CELF2, NOVA2, CELF3, RBM20	682	59	19256	3.82842	1	0.466691	0.465144
GOTERM_BP_DIRECT	GO:1902895~positive regulation of pri-miRNA transcription from RNA polymerase II promoter	8	1.0989	0.00509658	MYOCD, SMAD4, MYCN, SMAD3, POU2F1, KLF4, ETS1, BMPR1A	682	60	19256	3.76461	1	0.497516	0.495867
GOTERM_BP_DIRECT	GO:0060395~SMAD protein signal transduction	7	0.961538	0.00537693	SMAD4, SMAD3, RBPMS, HNF4A, MAGI2, SMAD5, HIPK2	682	46	19256	4.29657	1	0.509886	0.508196
GOTERM_BP_DIRECT	GO:0030182~neuron differentiation	14	1.92308	0.00560039	DDX6, MAP2K1, MEF2C, MYEF2, FZD4, ACSL4, SOX11, HIPK2, FUT9, NOVA2, ABL1, ERCC6, MET, HOXC8	682	164	19256	2.41027	1	0.516325	0.514614
GOTERM_BP_DIRECT	GO:0043524~negative regulation of neuron apoptotic process	13	1.78571	0.0063875	CNTFR, MEF2C, SIRT1, HIPK2, NR4A2, SLC25A27, TOX3, SIX4, AXL, KRAS, CPEB3, PPARGC1A, NAIP	682	148	19256	2.48007	1	0.572976	0.571077
GOTERM_BP_DIRECT	GO:1903905~positive regulation of establishment of T cell polarity	3	0.412088	0.00714602	ABL1, ABL2, FLOT2	682	4	19256	21.176	1	0.592941	0.590976
GOTERM_BP_DIRECT	GO:0071205~protein localization to juxtaparanode region of axon	3	0.412088	0.00714602	CNTNAP2, CNTNAP1, CNTN2	682	4	19256	21.176	1	0.592941	0.590976
GOTERM_BP_DIRECT	GO:0045163~clustering of voltage-gated potassium channels	3	0.412088	0.00714602	CNTNAP2, KCNB1, CNTN2	682	4	19256	21.176	1	0.592941	0.590976
GOTERM_BP_DIRECT	GO:0007409~axonogenesis	10	1.37363	0.00787606	NTNG1, NUMBL, CNTNAP1, CREB1, AMIGO1, ANK3, PRICKLE1, ZDHHC17, ACTB, IGF1R	682	98	19256	2.88108	1	0.637576	0.635463
GOTERM_BP_DIRECT	GO:0016055~Wnt signaling pathway	15	2.06044	0.00849578	AMER1, CSNK1G3, AMER2, DLX3, DDX3X, FZD4, CTNNBIP1, LEF1, DIXDC1, SENP2, HBP1, RSPO1, AMOTL1, BTRC, RSPO4	682	192	19256	2.20583	1	0.656608	0.654432
GOTERM_BP_DIRECT	GO:0071805~potassium ion transmembrane transport	12	1.64835	0.00851123	SLC24A2, HCN3, SLC24A3, KCNC1, KCND2, SLC9A6, KCNK10, KCNB1, KCNQ3, KCNA4, KCNQ5, KCNK3	682	135	19256	2.50974	1	0.656608	0.654432
GOTERM_BP_DIRECT	GO:0042981~regulation of apoptotic process	17	2.33516	0.00897185	RTKN, HIP1, FRS2, ETS1, SIRT1, ACTB, MBTD1, BCL2L13, TOX3, TRAF3, ABL1, CASP2, ABL2, GAS1, TARDBP, CCNL1, NAIP	682	233	19256	2.06004	1	0.656608	0.654432
GOTERM_BP_DIRECT	GO:0006470~protein dephosphorylation	11	1.51099	0.00909926	PTPRT, PPP6C, PPM1A, PPP3CA, MTMR3, CTDSP2, PTPRM, PPP2R3A, BTRC, PTPN4, PTPRG	682	118	19256	2.63204	1	0.656608	0.654432
GOTERM_BP_DIRECT	GO:0035556~intracellular signal transduction	26	3.57143	0.00910032	DDX3X, STK4, NUAK2, MAPK1, STK38L, PLCE1, PLCG1, MARK4, PAG1, MAPK4, SMAD4, WSB2, PRKCE, PLCL2, DCDC2, NFATC1, DGKZ, FER, NR4A3, PRKD3, CAMK4, DCX, PRKD1, RGL2, DGKH, ASB1	682	424	19256	1.73137	1	0.656608	0.654432
GOTERM_BP_DIRECT	GO:0031100~animal organ regeneration	6	0.824176	0.00931202	UPF2, NOTCH1, ANGPT2, NR4A3, AXL, CDK1	682	37	19256	4.57858	1	0.657587	0.655408
GOTERM_BP_DIRECT	GO:0007265~Ras protein signal transduction	9	1.23626	0.00966231	NRAS, RRAS, PLCE1, SHOC2, KRAS, RGL2, RASGRP1, SOS2, RALGPS2	682	84	19256	3.02514	1	0.668108	0.665894
GOTERM_BP_DIRECT	GO:0031016~pancreas development	5	0.686813	0.010856	HNF4A, ILDR2, PROX1, MET, ACVR2B	682	25	19256	5.64692	1	0.735326	0.732889
GOTERM_BP_DIRECT	GO:1900452~regulation of long term synaptic depression	3	0.412088	0.0116317	MAPT, SORCS3, SHANK3	682	5	19256	16.9408	1	0.756972	0.754463
GOTERM_BP_DIRECT	GO:0048679~regulation of axon regeneration	3	0.412088	0.0116317	MAP2K1, STK24, KLF4	682	5	19256	16.9408	1	0.756972	0.754463
GOTERM_BP_DIRECT	GO:0031054~pre-miRNA processing	4	0.549451	0.0119755	LIN28B, LIN28A, AGO4, AGO1	682	14	19256	8.06703	1	0.764358	0.761825
GOTERM_BP_DIRECT	GO:0010842~retina layer formation	5	0.686813	0.0124783	PTPRM, FAT3, TSPAN12, SDK2, HIPK2	682	26	19256	5.42973	1	0.777139	0.774563
GOTERM_BP_DIRECT	GO:0010976~positive regulation of neuron projection development	11	1.51099	0.012644	DDR1, CAMK1D, FUT9, NRXN1, AMIGO1, MAGI2, ABL2, SHOC2, ITGA6, PRKD1, TRIM67	682	124	19256	2.50468	1	0.777139	0.774563
GOTERM_BP_DIRECT	GO:0030177~positive regulation of Wnt signaling pathway	6	0.824176	0.0128935	FZD4, LEF1, DIXDC1, RSPO1, SULF1, RSPO4	682	40	19256	4.23519	1	0.778066	0.775487
GOTERM_BP_DIRECT	GO:0009791~post-embryonic development	8	1.0989	0.0145396	NR4A2, CCDC47, SCN9A, ABL1, PLAGL2, ASH1L, ACVR2B, GIGYF2	682	73	19256	3.0942	1	0.847545	0.844736
GOTERM_BP_DIRECT	GO:0006491~N-glycan processing	4	0.549451	0.0145819	FUT8, GANAB, MGAT4A, ST8SIA4	682	15	19256	7.52923	1	0.847545	0.844736
GOTERM_BP_DIRECT	GO:0051897~positive regulation of protein kinase B signaling	14	1.92308	0.0151938	DDR1, PDGFRA, HIP1, NRXN1, SIRT1, IGF1R, FER, LIN28A, CALCR, AXL, GCNT2, RICTOR, PRKD1, RGL2	682	186	19256	2.12519	1	0.847545	0.844736
GOTERM_BP_DIRECT	GO:0043161~proteasome-mediated ubiquitin-dependent protein catabolic process	16	2.1978	0.0154174	PSMD11, UBXN2B, NEDD4L, KLHL3, SIRT1, RAD23B, TRIM9, HECTD1, RMND5A, APPBP2, TBL1XR1, TRIM2, PSMF1, BTRC, CLOCK, SKP1	682	227	19256	1.9901	1	0.847545	0.844736
GOTERM_BP_DIRECT	GO:0007268~chemical synaptic transmission	16	2.1978	0.0160897	MPP2, KCND2, SYT1, NRXN1, CACNA1A, HTR2C, CACNA1E, GRM7, DLG3, PLP1, KCNQ3, MAPK1, PDE7B, ASIC2, KCNK3, SCN2B	682	228	19256	1.98138	1	0.847545	0.844736
GOTERM_BP_DIRECT	GO:0046777~protein autophosphorylation	12	1.64835	0.0169315	DDR1, PDGFRA, FER, CAMK2D, STK24, PEAK1, CAMK4, TAOK1, ABL1, PRKD1, STK4, IGF1R	682	149	19256	2.27393	1	0.847545	0.844736
GOTERM_BP_DIRECT	GO:0050672~negative regulation of lymphocyte proliferation	3	0.412088	0.017041	RASSF3, RASSF5, SOX11	682	6	19256	14.1173	1	0.847545	0.844736
GOTERM_BP_DIRECT	GO:0042297~vocal learning	3	0.412088	0.017041	CNTNAP2, NRXN1, SHANK3	682	6	19256	14.1173	1	0.847545	0.844736
GOTERM_BP_DIRECT	GO:0030578~PML body organization	3	0.412088	0.017041	HABP4, ETS1, HIPK2	682	6	19256	14.1173	1	0.847545	0.844736
GOTERM_BP_DIRECT	GO:0001756~somitogenesis	6	0.824176	0.0173056	SMAD3, LEF1, PLXNA2, PPP2R3A, DLL1, BMPR1A	682	43	19256	3.93971	1	0.847545	0.844736
GOTERM_BP_DIRECT	GO:0001702~gastrulation with mouth forming second	4	0.549451	0.0174834	SMAD4, TENM4, FRS2, ACVR2B	682	16	19256	7.05865	1	0.847545	0.844736
GOTERM_BP_DIRECT	GO:0071625~vocalization behavior	4	0.549451	0.0174834	CNTNAP2, BRINP1, NRXN1, SHANK3	682	16	19256	7.05865	1	0.847545	0.844736
GOTERM_BP_DIRECT	GO:0003161~cardiac conduction system development	4	0.549451	0.0174834	SMAD4, GJA5, SMAD5, BMPR1A	682	16	19256	7.05865	1	0.847545	0.844736
GOTERM_BP_DIRECT	GO:0007612~learning	7	0.961538	0.0176199	SLC24A2, CNTNAP2, ATXN1, UBA6, NRXN1, SORCS3, SHANK3	682	59	19256	3.34987	1	0.847545	0.844736
GOTERM_BP_DIRECT	GO:0048041~focal adhesion assembly	5	0.686813	0.0182432	PEAK1, RCC2, CDH11, CORO2B, ARHGAP6	682	29	19256	4.86804	1	0.864987	0.86212
GOTERM_BP_DIRECT	GO:0048812~neuron projection morphogenesis	7	0.961538	0.0190114	GPM6A, CNTNAP2, CNTNAP1, SLC9A6, ALS2, NRXN1, GAS7	682	60	19256	3.29404	1	0.888717	0.885772
GOTERM_BP_DIRECT	GO:0030154~cell differentiation	35	4.80769	0.0202248	HIP1, THRB, NOTCH1, DDX3X, UHRF2, GATA6, ILDR2, NEDD4L, CREBL2, FGF1, ETS1, RASGRP1, DLL1, HNF4A, PEG10, ZNF268, MEF2C, SMAD4, YES1, SMAD3, SYT1, SFMBT1, EYA3, EYA4, FOXJ3, FOXJ2, SMAD5, ELF1, ELF4, CAPRIN1, PRKD1, ERG, SLC25A31, INA, FRK	682	665	19256	1.48603	1	0.932309	0.929219
GOTERM_BP_DIRECT	GO:0048863~stem cell differentiation	6	0.824176	0.0226163	GPM6A, PSMD11, LIN28A, ZNF281, GATA6, HOXA7	682	46	19256	3.68277	1	1	0.996986
GOTERM_BP_DIRECT	GO:0070372~regulation of ERK1 and ERK2 cascade	5	0.686813	0.0228701	EPHA7, RRAS, FRS2, RASGRP1, ZDHHC17	682	31	19256	4.55397	1	1	0.996986
GOTERM_BP_DIRECT	GO:0000183~chromatin silencing at rDNA	3	0.412088	0.0233032	BEND3, BAZ2A, SIRT1	682	7	19256	12.1005	1	1	0.996986
GOTERM_BP_DIRECT	GO:0050872~white fat cell differentiation	4	0.549451	0.0241803	PER2, PDGFRA, TBL1XR1, SIRT1	682	18	19256	6.27436	1	1	0.996986
GOTERM_BP_DIRECT	GO:0070527~platelet aggregation	6	0.824176	0.0245964	PDGFRA, MYH9, SLC7A11, METAP1, VCL, ACTB	682	47	19256	3.60442	1	1	0.996986
GOTERM_BP_DIRECT	GO:0048706~embryonic skeletal system development	5	0.686813	0.0254271	KIAA1217, MBTD1, XYLT1, SULF1, PBX1	682	32	19256	4.41166	1	1	0.996986
GOTERM_BP_DIRECT	GO:0048009~insulin-like growth factor receptor signaling pathway	5	0.686813	0.0254271	MAP2K1, GRB10, MAPK1, GIGYF2, IGF1R	682	32	19256	4.41166	1	1	0.996986
GOTERM_BP_DIRECT	GO:0051402~neuron apoptotic process	8	1.0989	0.0259297	NR4A2, EPHA7, AXL, ABL1, KCNQ3, KRAS, PPARGC1A, HIPK2	682	82	19256	2.7546	1	1	0.996986
GOTERM_BP_DIRECT	GO:0071456~cellular response to hypoxia	11	1.51099	0.025955	NOTCH1, KCND2, PRKCE, HP1BP3, GATA6, MDM4, RORA, ADO, SIRT1, KCNK3, HIPK2	682	139	19256	2.23439	1	1	0.996986
GOTERM_BP_DIRECT	GO:0001701~in utero embryonic development	15	2.06044	0.0259717	PDGFRA, SMAD4, NOTCH1, SMAD3, GATA6, ADAM10, UBR3, TANC2, EPB41L5, COL3A1, FUT8, SH3PXD2A, MYH9, PLCG1, BMPR1A	682	221	19256	1.91638	1	1	0.996986
GOTERM_BP_DIRECT	GO:0048538~thymus development	6	0.824176	0.0266845	MAP2K1, SIX4, LMO4, ABL1, MAPK1, PBX1	682	48	19256	3.52933	1	1	0.996986
GOTERM_BP_DIRECT	GO:0006606~protein import into nucleus	9	1.23626	0.0267435	PPP3CA, IPO8, NOTCH1, PPP1R10, KCNQ3, KPNA4, E2F3, PRICKLE1, STK4	682	101	19256	2.51595	1	1	0.996986
GOTERM_BP_DIRECT	GO:0006351~transcription, DNA-templated	9	1.23626	0.0267435	NR4A2, SMAD4, THRB, RRAGC, GPBP1, RFX3, BAZ2A, CREBL2, CBFA2T3	682	101	19256	2.51595	1	1	0.996986
GOTERM_BP_DIRECT	GO:0018105~peptidyl-serine phosphorylation	12	1.64835	0.0270309	CSNK1G3, CAMK2D, CAMK1D, PRKCE, CAMK4, CDK1, STK38L, MAPK1, RICTOR, PRKD1, STK4, HIPK2	682	160	19256	2.1176	1	1	0.996986
GOTERM_BP_DIRECT	GO:0007416~synapse assembly	7	0.961538	0.0270955	GPM6A, NRXN1, MAPT, ASIC2, SHANK3, SDK2, ADD2	682	65	19256	3.04065	1	1	0.996986
GOTERM_BP_DIRECT	GO:0036211~protein modification process	10	1.37363	0.0279094	CSNK1G3, PCMT1, YES1, PPP4R2, GGCX, PRKD3, ABL1, ST8SIA4, ABL2, PRKD1	682	121	19256	2.33344	1	1	0.996986
GOTERM_BP_DIRECT	GO:0007548~sex differentiation	4	0.549451	0.0279768	CNTFR, HNF4A, DMRTA1, PBX1	682	19	19256	5.94413	1	1	0.996986
GOTERM_BP_DIRECT	GO:0007605~sensory perception of sound	12	1.64835	0.0281265	GJC3, THRB, GRM7, FZD4, MYO6, KCNQ3, DCDC2, CACNA1D, LRIG2, SLC17A8, ASIC2, SOBP	682	161	19256	2.10444	1	1	0.996986
GOTERM_BP_DIRECT	GO:0060045~positive regulation of cardiac muscle cell proliferation	5	0.686813	0.0281492	MEF2C, NOTCH1, GATA6, CDK1, BMPR1A	682	33	19256	4.27797	1	1	0.996986
GOTERM_BP_DIRECT	GO:0048873~homeostasis of number of cells within a tissue	5	0.686813	0.0281492	NOTCH1, ILDR2, KRAS, GIGYF2, FOSL2	682	33	19256	4.27797	1	1	0.996986
GOTERM_BP_DIRECT	GO:0003281~ventricular septum development	5	0.686813	0.0281492	HECTD1, LMO4, GJA5, MDM4, FRS2	682	33	19256	4.27797	1	1	0.996986
GOTERM_BP_DIRECT	GO:0070371~ERK1 and ERK2 cascade	6	0.824176	0.0288823	MAP2K1, SMAD4, GRB10, CDK1, ABL1, MAPK1	682	49	19256	3.4573	1	1	0.996986
GOTERM_BP_DIRECT	GO:0010595~positive regulation of endothelial cell migration	7	0.961538	0.0289475	RRAS, ABL1, PRKD1, PROX1, FGF1, ETS1, FOXP1	682	66	19256	2.99458	1	1	0.996986
GOTERM_BP_DIRECT	GO:0060509~Type I pneumocyte differentiation	3	0.412088	0.0303515	CREB1, THRB, KRAS	682	8	19256	10.588	1	1	0.996986
GOTERM_BP_DIRECT	GO:0045656~negative regulation of monocyte differentiation	3	0.412088	0.0303515	CDK6, ZBTB46, HOXA7	682	8	19256	10.588	1	1	0.996986
GOTERM_BP_DIRECT	GO:2001259~positive regulation of cation channel activity	3	0.412088	0.0303515	STAC, ANK2, ANK3	682	8	19256	10.588	1	1	0.996986
GOTERM_BP_DIRECT	GO:0097120~receptor localization to synapse	3	0.412088	0.0303515	MPP2, DLG3, NRXN1	682	8	19256	10.588	1	1	0.996986
GOTERM_BP_DIRECT	GO:0007613~memory	8	1.0989	0.0307922	SLC24A2, ATXN1, CREB1, KCNK10, CRTC1, MAPT, SORCS3, SHANK3	682	85	19256	2.65737	1	1	0.996986
GOTERM_BP_DIRECT	GO:0030522~intracellular receptor signaling pathway	5	0.686813	0.0310381	NR4A2, NR4A3, HNF4A, RORA, RORB	682	34	19256	4.15215	1	1	0.996986
GOTERM_BP_DIRECT	GO:0021954~central nervous system neuron development	4	0.549451	0.0320703	BRINP1, NOVA2, TAOK1, MAPT	682	20	19256	5.64692	1	1	0.996986
GOTERM_BP_DIRECT	GO:0061564~axon development	5	0.686813	0.034095	DDR1, GRM7, PLP1, MAPT, CAMSAP2	682	35	19256	4.03351	1	1	0.996986
GOTERM_BP_DIRECT	GO:0030100~regulation of endocytosis	5	0.686813	0.034095	HIP1, ABL1, SNX12, ABL2, STON2	682	35	19256	4.03351	1	1	0.996986
GOTERM_BP_DIRECT	GO:0016485~protein processing	8	1.0989	0.0343532	CPM, MMP16, CPD, DDI2, CASP2, ADAM10, ATG4B, ECE1	682	87	19256	2.59629	1	1	0.996986
GOTERM_BP_DIRECT	GO:0006397~mRNA processing	15	2.06044	0.0348214	KHDRBS1, RBM47, CNOT6L, CELF2, THOC2, A1CF, QKI, PTBP3, PPP4R2, PAPOLG, HABP4, RBM20, TARDBP, PPARGC1A, SRSF11	682	230	19256	1.84139	1	1	0.996986
GOTERM_BP_DIRECT	GO:0045948~positive regulation of translational initiation	4	0.549451	0.0364583	KHDRBS1, DDX3X, LARP1, HABP4	682	21	19256	5.37802	1	1	0.996986
GOTERM_BP_DIRECT	GO:0099072~regulation of postsynaptic specialization membrane neurotransmitter receptor levels	4	0.549451	0.0364583	DLG3, SLC9A6, PPFIA1, FLOT2	682	21	19256	5.37802	1	1	0.996986
GOTERM_BP_DIRECT	GO:0001649~osteoblast differentiation	10	1.37363	0.0364721	SYNCRIP, MEF2C, SMAD4, CBFB, CCDC47, LEF1, CLTC, SMAD5, BMPR1A, FOSL2	682	127	19256	2.2232	1	1	0.996986
GOTERM_BP_DIRECT	GO:0071300~cellular response to retinoic acid	7	0.961538	0.0371793	BRINP1, YES1, CREB1, FZD4, ABL2, RORB, KLF4	682	70	19256	2.82346	1	1	0.996986
GOTERM_BP_DIRECT	GO:0008283~cell proliferation	11	1.51099	0.0376234	RAP1B, DDR1, TBCK, NDST1, CNTNAP2, SMAD4, LARP1, FZD4, MAB21L1, CDC25A, HIPK2	682	148	19256	2.09852	1	1	0.996986
GOTERM_BP_DIRECT	GO:0051260~protein homooligomerization	10	1.37363	0.0380562	MPP2, KCNC1, KCND2, ALS2, KCNB1, KCTD21, PEG10, BEND3, KCNA4, MAPT	682	128	19256	2.20583	1	1	0.996986
GOTERM_BP_DIRECT	GO:0003283~atrial septum development	3	0.412088	0.0381224	GJA5, MDM4, ANK2	682	9	19256	9.41153	1	1	0.996986
GOTERM_BP_DIRECT	GO:0003254~regulation of membrane depolarization	3	0.412088	0.0381224	HCN3, CAMK2D, NEDD4L	682	9	19256	9.41153	1	1	0.996986
GOTERM_BP_DIRECT	GO:0010501~RNA secondary structure unwinding	3	0.412088	0.0381224	DDX3X, AGO4, AGO1	682	9	19256	9.41153	1	1	0.996986
GOTERM_BP_DIRECT	GO:2000650~negative regulation of sodium ion transmembrane transporter activity	3	0.412088	0.0381224	CAMK2D, PRKCE, NEDD4L	682	9	19256	9.41153	1	1	0.996986
GOTERM_BP_DIRECT	GO:0006198~cAMP catabolic process	3	0.412088	0.0381224	PDE10A, PDE4D, PDE7B	682	9	19256	9.41153	1	1	0.996986
GOTERM_BP_DIRECT	GO:0048617~embryonic foregut morphogenesis	3	0.412088	0.0381224	EPB41L5, SMAD3, ACVR2B	682	9	19256	9.41153	1	1	0.996986
GOTERM_BP_DIRECT	GO:0003151~outflow tract morphogenesis	6	0.824176	0.038797	MEF2C, NOTCH1, GJA5, SOX11, PRICKLE1, BMPR1A	682	53	19256	3.19637	1	1	0.996986
GOTERM_BP_DIRECT	GO:0030335~positive regulation of cell migration	16	2.1978	0.0405877	PDGFRA, NOTCH1, SMAD3, FZD4, LEF1, ADAM10, FGF1, IGF1R, PPP3CA, FER, PODXL, PLP1, GCNT2, ITGA6, ZNF304, ZNF268	682	257	19256	1.7578	1	1	0.996986
GOTERM_BP_DIRECT	GO:0031333~negative regulation of protein complex assembly	5	0.686813	0.0407157	DDX3X, TRAF3IP1, LMO4, CTNNBIP1, SORL1	682	37	19256	3.81549	1	1	0.996986
GOTERM_BP_DIRECT	GO:0060412~ventricular septum morphogenesis	5	0.686813	0.0407157	SMAD4, NOTCH1, SOX11, PROX1, BMPR1A	682	37	19256	3.81549	1	1	0.996986
GOTERM_BP_DIRECT	GO:0016236~macroautophagy	7	0.961538	0.0442443	GABARAPL1, MTMR3, VPS4A, ATG4B, YOD1, KLHL3, ZFYVE1	682	73	19256	2.70743	1	1	0.996986
GOTERM_BP_DIRECT	GO:0098703~calcium ion import across plasma membrane	5	0.686813	0.0442801	SLC24A2, SCN9A, CACNA1A, CACNA1D, CACNA1E	682	38	19256	3.71508	1	1	0.996986
GOTERM_BP_DIRECT	GO:0032956~regulation of actin cytoskeleton organization	8	1.0989	0.04442	PDGFRA, TAOK1, DIXDC1, ABL1, ABL2, RICTOR, CELSR1, CORO2B	682	92	19256	2.45518	1	1	0.996986
GOTERM_BP_DIRECT	GO:0033674~positive regulation of kinase activity	6	0.824176	0.0444428	DDR1, PDGFRA, AXL, LMO4, MET, IGF1R	682	55	19256	3.08014	1	1	0.996986
GOTERM_BP_DIRECT	GO:0007157~heterophilic cell-cell adhesion via plasma membrane cell adhesion molecules	6	0.824176	0.0444428	ALCAM, TENM4, NRXN1, AMIGO1, FAT4, HMCN1	682	55	19256	3.08014	1	1	0.996986
GOTERM_BP_DIRECT	GO:0006487~protein N-linked glycosylation	6	0.824176	0.0444428	FUT8, ALG9, FUT9, MGAT4A, MGAT3, MOGS	682	55	19256	3.08014	1	1	0.996986
GOTERM_BP_DIRECT	GO:0035176~social behavior	6	0.824176	0.0444428	CNTNAP2, BRINP1, ATXN1, GRID1, NRXN1, SHANK3	682	55	19256	3.08014	1	1	0.996986
GOTERM_BP_DIRECT	GO:0016567~protein ubiquitination	25	3.43407	0.0459326	PPP1R11, UHRF2, UBA6, RNF38, UBR3, NEDD4L, DCAF7, TRIM9, RNF213, HECTD1, OS9, KCTD21, ARIH1, DCAF10, BTRC, SKP1, WSB2, UBE2E1, KLHL3, SIRT1, APPBP2, GAN, RLIM, MDM4, ASB1	682	469	19256	1.50504	1	1	0.996986
GOTERM_BP_DIRECT	GO:0048589~developmental growth	4	0.549451	0.0461028	SMAD4, SMAD3, GAS1, BMPR1A	682	23	19256	4.91037	1	1	0.996986
GOTERM_BP_DIRECT	GO:0031123~RNA 3'-end processing	3	0.412088	0.0465563	LIN28B, LIN28A, PAPOLG	682	10	19256	8.47038	1	1	0.996986
GOTERM_BP_DIRECT	GO:0043586~tongue development	3	0.412088	0.0465563	BNC2, SIX4, LEF1	682	10	19256	8.47038	1	1	0.996986
GOTERM_BP_DIRECT	GO:0071875~adrenergic receptor signaling pathway	3	0.412088	0.0465563	AKAP13, PDE4D, ZDHHC21	682	10	19256	8.47038	1	1	0.996986
GOTERM_BP_DIRECT	GO:0030073~insulin secretion	5	0.686813	0.0480137	SLC30A8, HNF4A, PRKCE, ILDR2, ACVR2B	682	39	19256	3.61982	1	1	0.996986
GOTERM_BP_DIRECT	GO:0009952~anterior/posterior pattern specification	8	1.0989	0.0489261	CTNNBIP1, HOXA7, CELSR1, MLLT3, HOXC8, ACVR2B, PBX1, HIPK2	682	94	19256	2.40295	1	1	0.996986
GOTERM_BP_DIRECT	GO:0043484~regulation of RNA splicing	7	0.961538	0.0493897	ATXN7, RBM20, ILDR2, HNRNPH2, CCNL1, ATXN7L3, PTBP3	682	75	19256	2.63523	1	1	0.996986
GOTERM_BP_DIRECT	GO:0010468~regulation of gene expression	14	1.92308	0.0500283	TSHZ2, TET2, THOC2, PROX1, AFF4, AFF1, TAPBP, FOXP1, FUT8, CDK6, IGF2BP1, RICTOR, IGF2BP3, TARDBP	682	220	19256	1.79675	1	1	0.996986
GOTERM_BP_DIRECT	GO:0050768~negative regulation of neurogenesis	4	0.549451	0.0513494	NOTCH1, BRINP1, SORL1, BMPR1A	682	24	19256	4.70577	1	1	0.996986
GOTERM_BP_DIRECT	GO:0097150~neuronal stem cell population maintenance	4	0.549451	0.0513494	NOTCH1, IGF2BP1, PROX1, DLL1	682	24	19256	4.70577	1	1	0.996986
GOTERM_BP_DIRECT	GO:0000165~MAPK cascade	9	1.23626	0.0535843	MEF2C, MAP2K1, NRAS, MAP3K1, PRKCE, KRAS, ASH1L, SHANK3, MAPK4	682	116	19256	2.19062	1	1	0.996986
GOTERM_BP_DIRECT	GO:0035725~sodium ion transmembrane transport	9	1.23626	0.0535843	SLC24A2, SLC4A7, HCN3, SLC4A8, SLC24A3, SCN9A, SLC17A8, ASIC2, SCN2B	682	116	19256	2.19062	1	1	0.996986
GOTERM_BP_DIRECT	GO:0035264~multicellular organism growth	8	1.0989	0.0537123	COL3A1, TBL1XR1, PLAG1, PRICKLE1, ERCC6, SLC25A25, GIGYF2, FOSL2	682	96	19256	2.35288	1	1	0.996986
GOTERM_BP_DIRECT	GO:0042060~wound healing	7	0.961538	0.0548879	PDGFRA, PPP3CA, COL3A1, SMAD3, NFATC1, CELSR1, FGF1	682	77	19256	2.56678	1	1	0.996986
GOTERM_BP_DIRECT	GO:0048511~rhythmic process	7	0.961538	0.0548879	TEF, CRTC1, HNF4A, CDK1, RORB, BTRC, TARDBP	682	77	19256	2.56678	1	1	0.996986
GOTERM_BP_DIRECT	GO:0042753~positive regulation of circadian rhythm	3	0.412088	0.0555967	RORA, BTRC, CLOCK	682	11	19256	7.70035	1	1	0.996986
GOTERM_BP_DIRECT	GO:0070934~CRD-mediated mRNA stabilization	3	0.412088	0.0555967	SYNCRIP, IGF2BP1, IGF2BP3	682	11	19256	7.70035	1	1	0.996986
GOTERM_BP_DIRECT	GO:1902036~regulation of hematopoietic stem cell differentiation	3	0.412088	0.0555967	YTHDF2, CDK6, ABL1	682	11	19256	7.70035	1	1	0.996986
GOTERM_BP_DIRECT	GO:0097484~dendrite extension	3	0.412088	0.0555967	AUTS2, SLC9A6, WASF1	682	11	19256	7.70035	1	1	0.996986
GOTERM_BP_DIRECT	GO:0060020~Bergmann glial cell differentiation	3	0.412088	0.0555967	MAP2K1, ABL1, MAPK1	682	11	19256	7.70035	1	1	0.996986
GOTERM_BP_DIRECT	GO:1901537~positive regulation of DNA demethylation	3	0.412088	0.0555967	OTUD4, SYNCRIP, A1CF	682	11	19256	7.70035	1	1	0.996986
GOTERM_BP_DIRECT	GO:1902514~regulation of calcium ion transmembrane transport via high voltage-gated calcium channel	3	0.412088	0.0555967	CAMK2D, PDE4D, NOS1AP	682	11	19256	7.70035	1	1	0.996986
GOTERM_BP_DIRECT	GO:0060563~neuroepithelial cell differentiation	3	0.412088	0.0555967	ABL1, SOX11, DLL1	682	11	19256	7.70035	1	1	0.996986
GOTERM_BP_DIRECT	GO:0051775~response to redox state	3	0.412088	0.0555967	FKBP1B, SLC7A11, CLOCK	682	11	19256	7.70035	1	1	0.996986
GOTERM_BP_DIRECT	GO:0007155~cell adhesion	28	3.84615	0.055932	DDR1, PTPRT, CNTNAP2, CNTNAP1, COL12A1, ADAM22, PTPRM, SLC7A11, HAPLN1, ALCAM, PODXL, FLOT2, ABL2, ITGB8, OPCML, PRKCE, LAMB4, CASK, MTSS1, FER, BCAM, PPFIBP1, CDH11, CNTN2, ITGA6, CD47, TLN2, VCL	682	551	19256	1.43479	1	1	0.996986
GOTERM_BP_DIRECT	GO:0031047~gene silencing by RNA	5	0.686813	0.0559859	DDX17, LIN28B, CNOT6L, AGO1, TNRC6B	682	41	19256	3.44324	1	1	0.996986
GOTERM_BP_DIRECT	GO:0008284~positive regulation of cell proliferation	26	3.57143	0.0562259	CNTFR, NOTCH1, FGF1, DLL1, ACTB, IGF1R, SLC25A27, GCNT2, E2F3, ZNF268, IL6R, PDGFRA, SMARCC1, MYOCD, CNOT6L, GLCE, GLP2R, ADAM10, NAP1L1, PROX1, PRLR, SIRT1, HIPK2, FER, MAB21L1, CD47	682	504	19256	1.45655	1	1	0.996986
GOTERM_BP_DIRECT	GO:0030325~adrenal gland development	4	0.549451	0.0568712	PDGFRA, SMAD4, SMAD3, PBX1	682	25	19256	4.51754	1	1	0.996986
GOTERM_BP_DIRECT	GO:0014850~response to muscle activity	4	0.549451	0.0568712	FNDC5, NFATC1, SLC38A2, PPARGC1A	682	25	19256	4.51754	1	1	0.996986
GOTERM_BP_DIRECT	GO:0060038~cardiac muscle cell proliferation	4	0.549451	0.0568712	NOTCH1, TENM4, GATA6, ABL1	682	25	19256	4.51754	1	1	0.996986
GOTERM_BP_DIRECT	GO:0045332~phospholipid translocation	4	0.549451	0.0568712	ATP8B4, ABCC1, ATP11C, ATP10A	682	25	19256	4.51754	1	1	0.996986
GOTERM_BP_DIRECT	GO:0032024~positive regulation of insulin secretion	6	0.824176	0.0571352	SLC30A8, PRKCE, NNAT, ACSL4, MYRIP, TARDBP	682	59	19256	2.87132	1	1	0.996986
GOTERM_BP_DIRECT	GO:0007266~Rho protein signal transduction	6	0.824176	0.0571352	RTKN, ARHGEF12, COL1A2, ARHGAP1, CELSR1, ARHGAP6	682	59	19256	2.87132	1	1	0.996986
GOTERM_BP_DIRECT	GO:0042475~odontogenesis of dentin-containing tooth	6	0.824176	0.0571352	PDGFRA, DLX3, LEF1, GATA6, ACVR2B, BMPR1A	682	59	19256	2.87132	1	1	0.996986
GOTERM_BP_DIRECT	GO:0031175~neuron projection development	9	1.23626	0.060483	GPM6A, CNTNAP2, CLMN, NRXN1, PTPRM, MAPT, ERCC6, PPP1R9A, CAMSAP2	682	119	19256	2.13539	1	1	0.996986
GOTERM_BP_DIRECT	GO:0007275~multicellular organism development	7	0.961538	0.0607415	DDR1, PDGFRA, AXL, CDH11, GCNT2, MET, IGF1R	682	79	19256	2.5018	1	1	0.996986
GOTERM_BP_DIRECT	GO:0010608~posttranscriptional regulation of gene expression	4	0.549451	0.0626616	EPB41L5, LARP1, GCNT2, LARP4	682	26	19256	4.34379	1	1	0.996986
GOTERM_BP_DIRECT	GO:0022604~regulation of cell morphogenesis	4	0.549451	0.0626616	FMNL3, ZMYM4, AGO4, LARP4	682	26	19256	4.34379	1	1	0.996986
GOTERM_BP_DIRECT	GO:0050900~leukocyte migration	4	0.549451	0.0626616	YES1, MYH9, ITGA6, ADD2	682	26	19256	4.34379	1	1	0.996986
GOTERM_BP_DIRECT	GO:0050821~protein stabilization	14	1.92308	0.0642202	HIP1, SMAD3, MTMR9, CREBL2, ANK2, STK4, A1CF, RAB21, CREB1, RASSF2, CDC37L1, FLOT2, MDM4, PPARGC1A	682	229	19256	1.72613	1	1	0.996986
GOTERM_BP_DIRECT	GO:0045766~positive regulation of angiogenesis	11	1.51099	0.0643205	ANGPT2, RRAS, GATA6, ITGB8, ZNF304, PRKD1, PLCG1, FGF1, ETS1, SIRT1, HIPK2	682	163	19256	1.9054	1	1	0.996986
GOTERM_BP_DIRECT	GO:0035022~positive regulation of Rac protein signal transduction	3	0.412088	0.0651903	AUTS2, ALS2, KRAS	682	12	19256	7.05865	1	1	0.996986
GOTERM_BP_DIRECT	GO:0032330~regulation of chondrocyte differentiation	3	0.412088	0.0651903	MAF, TRPS1, MBOAT2	682	12	19256	7.05865	1	1	0.996986
GOTERM_BP_DIRECT	GO:0060998~regulation of dendritic spine development	3	0.412088	0.0651903	MEF2C, CPEB3, TANC2	682	12	19256	7.05865	1	1	0.996986
GOTERM_BP_DIRECT	GO:0048680~positive regulation of axon regeneration	3	0.412088	0.0651903	STK24, FKBP1B, IGF1R	682	12	19256	7.05865	1	1	0.996986
GOTERM_BP_DIRECT	GO:0007030~Golgi organization	9	1.23626	0.065378	RAB43, ARHGAP21, LMAN1, ATP8B4, UBXN2B, SURF4, GOLPH3L, TRAPPC8, PRKD1	682	121	19256	2.10009	1	1	0.996986
GOTERM_BP_DIRECT	GO:0030509~BMP signaling pathway	7	0.961538	0.0669514	SMAD4, DLX3, LEF1, ABL1, SMAD5, ACVR2B, BMPR1A	682	81	19256	2.44003	1	1	0.996986
GOTERM_BP_DIRECT	GO:0030324~lung development	7	0.961538	0.0669514	PDGFRA, COL3A1, NOTCH1, PROX1, FGF1, ACVR2B, BMPR1A	682	81	19256	2.44003	1	1	0.996986
GOTERM_BP_DIRECT	GO:0043087~regulation of GTPase activity	6	0.824176	0.0678826	FGD6, ALS2, CHN2, PLXNA2, TBC1D15, ARHGAP12	682	62	19256	2.73238	1	1	0.996986
GOTERM_BP_DIRECT	GO:0008380~RNA splicing	13	1.78571	0.0683714	RBM47, CELF3, THOC2, QKI, PTBP3, SYNCRIP, PPP4R2, RRAGC, HABP4, RBM20, TARDBP, PPARGC1A, SRSF11	682	209	19256	1.75622	1	1	0.996986
GOTERM_BP_DIRECT	GO:0031116~positive regulation of microtubule polymerization	4	0.549451	0.0687134	CLIP1, NAV3, MAPT, MET	682	27	19256	4.1829	1	1	0.996986
GOTERM_BP_DIRECT	GO:0051353~positive regulation of oxidoreductase activity	2	0.274725	0.0694822	ABL1, ABL2	682	2	19256	28.2346	1	1	0.996986
GOTERM_BP_DIRECT	GO:0046619~optic placode formation involved in camera-type eye formation	2	0.274725	0.0694822	FRS2, PROX1	682	2	19256	28.2346	1	1	0.996986
GOTERM_BP_DIRECT	GO:0072160~nephron tubule epithelial cell differentiation	2	0.274725	0.0694822	MEF2C, MTSS1	682	2	19256	28.2346	1	1	0.996986
GOTERM_BP_DIRECT	GO:0097117~guanylate kinase-associated protein clustering	2	0.274725	0.0694822	NRXN1, SHANK3	682	2	19256	28.2346	1	1	0.996986
GOTERM_BP_DIRECT	GO:0019074~viral RNA genome packaging	2	0.274725	0.0694822	DDX6, PC	682	2	19256	28.2346	1	1	0.996986
GOTERM_BP_DIRECT	GO:0001889~liver development	7	0.961538	0.0701899	UPF2, NOTCH1, SMAD3, HNF4A, GATA6, PROX1, MET	682	82	19256	2.41027	1	1	0.996986
GOTERM_BP_DIRECT	GO:0042552~myelination	6	0.824176	0.0716974	GALC, MAP2K1, GJC3, AMIGO1, MAPK1, QKI	682	63	19256	2.68901	1	1	0.996986
GOTERM_BP_DIRECT	GO:0051896~regulation of protein kinase B signaling	4	0.549451	0.0750188	PPP1R16B, RRAS, RICTOR, RASGRP1	682	28	19256	4.03351	1	1	0.996986
GOTERM_BP_DIRECT	GO:1990138~neuron projection extension	4	0.549451	0.0750188	DDR1, NRN1, ALCAM, PRICKLE1	682	28	19256	4.03351	1	1	0.996986
GOTERM_BP_DIRECT	GO:0006306~DNA methylation	4	0.549451	0.0750188	BEND3, BAZ2A, ARID4B, MTA2	682	28	19256	4.03351	1	1	0.996986
GOTERM_BP_DIRECT	GO:0034063~stress granule assembly	4	0.549451	0.0750188	DDX6, YTHDF2, DDX3X, MAPT	682	28	19256	4.03351	1	1	0.996986
GOTERM_BP_DIRECT	GO:0072583~clathrin-dependent endocytosis	4	0.549451	0.0750188	MAGI2, CLTC, STON2, DLL1	682	28	19256	4.03351	1	1	0.996986
GOTERM_BP_DIRECT	GO:0010971~positive regulation of G2/M transition of mitotic cell cycle	4	0.549451	0.0750188	RCC2, CDK1, CDC25A, PBX1	682	28	19256	4.03351	1	1	0.996986
GOTERM_BP_DIRECT	GO:0009314~response to radiation	3	0.412088	0.0752867	COL3A1, CDC25A, POLH	682	13	19256	6.51568	1	1	0.996986
GOTERM_BP_DIRECT	GO:0010762~regulation of fibroblast migration	3	0.412088	0.0752867	FER, RCC2, MTA2	682	13	19256	6.51568	1	1	0.996986
GOTERM_BP_DIRECT	GO:0034333~adherens junction assembly	3	0.412088	0.0752867	FER, VCL, ACTB	682	13	19256	6.51568	1	1	0.996986
GOTERM_BP_DIRECT	GO:0007398~ectoderm development	3	0.412088	0.0752867	AMER2, EPB41L5, BMPR1A	682	13	19256	6.51568	1	1	0.996986
GOTERM_BP_DIRECT	GO:0031113~regulation of microtubule polymerization	3	0.412088	0.0752867	ABL1, MAPT, CAMSAP2	682	13	19256	6.51568	1	1	0.996986
GOTERM_BP_DIRECT	GO:0032446~protein modification by small protein conjugation	4	0.549451	0.0815698	UBA6, UBE2E3, UBE2E1, KRAS	682	29	19256	3.89443	1	1	0.996986
GOTERM_BP_DIRECT	GO:0045070~positive regulation of viral genome replication	4	0.549451	0.0815698	NOTCH1, DDX3X, LARP1, VAPB	682	29	19256	3.89443	1	1	0.996986
GOTERM_BP_DIRECT	GO:0042100~B cell proliferation	5	0.686813	0.0838439	MEF2C, CR2, LEF1, RASGRP1, FOSL2	682	47	19256	3.00368	1	1	0.996986
GOTERM_BP_DIRECT	GO:0097009~energy homeostasis	5	0.686813	0.0838439	NR4A3, CRTC1, DLL1, SIRT1, PPARGC1A	682	47	19256	3.00368	1	1	0.996986
GOTERM_BP_DIRECT	GO:0045739~positive regulation of DNA repair	5	0.686813	0.0838439	INO80D, EYA3, EYA4, ERCC6, SIRT1	682	47	19256	3.00368	1	1	0.996986
GOTERM_BP_DIRECT	GO:0090090~negative regulation of canonical Wnt signaling pathway	10	1.37363	0.0852542	AMER1, AMER2, SMAD4, NOTCH1, CTNNBIP1, PPP2R3A, PRICKLE1, STK4, MLLT3, BICC1	682	150	19256	1.88231	1	1	0.996986
GOTERM_BP_DIRECT	GO:0032228~regulation of synaptic transmission, GABAergic	3	0.412088	0.0858386	USP46, PLCL2, KRAS	682	14	19256	6.05027	1	1	0.996986
GOTERM_BP_DIRECT	GO:0051152~positive regulation of smooth muscle cell differentiation	3	0.412088	0.0858386	MYOCD, NOTCH1, SIRT1	682	14	19256	6.05027	1	1	0.996986
GOTERM_BP_DIRECT	GO:0033120~positive regulation of RNA splicing	3	0.412088	0.0858386	HABP4, RBM20, SLC38A2	682	14	19256	6.05027	1	1	0.996986
GOTERM_BP_DIRECT	GO:0035194~posttranscriptional gene silencing by RNA	3	0.412088	0.0858386	AGO4, AGO1, TSN	682	14	19256	6.05027	1	1	0.996986
GOTERM_BP_DIRECT	GO:0038083~peptidyl-tyrosine autophosphorylation	3	0.412088	0.0858386	DDR1, ABL1, IGF1R	682	14	19256	6.05027	1	1	0.996986
GOTERM_BP_DIRECT	GO:0070102~interleukin-6-mediated signaling pathway	3	0.412088	0.0858386	FER, SMAD4, IL6R	682	14	19256	6.05027	1	1	0.996986
GOTERM_BP_DIRECT	GO:0022010~central nervous system myelination	3	0.412088	0.0858386	CNTNAP1, MYRF, PLP1	682	14	19256	6.05027	1	1	0.996986
GOTERM_BP_DIRECT	GO:0051279~regulation of release of sequestered calcium ion into cytosol	3	0.412088	0.0858386	PRKCE, ANK2, PRKD1	682	14	19256	6.05027	1	1	0.996986
GOTERM_BP_DIRECT	GO:0016525~negative regulation of angiogenesis	9	1.23626	0.0873489	SPRED1, ANGPT2, AGO1, FOXJ2, PTPRM, VASH1, KLF4, SULF1, QKI	682	129	19256	1.96986	1	1	0.996986
GOTERM_BP_DIRECT	GO:0007026~negative regulation of microtubule depolymerization	4	0.549451	0.088358	NAV3, ATXN7, TAOK1, CAMSAP2	682	30	19256	3.76461	1	1	0.996986
GOTERM_BP_DIRECT	GO:0048701~embryonic cranial skeleton morphogenesis	4	0.549451	0.088358	PDGFRA, SMAD3, MMP16, SIX4	682	30	19256	3.76461	1	1	0.996986
GOTERM_BP_DIRECT	GO:0031032~actomyosin structure organization	4	0.549451	0.088358	EPB41L5, FRMD5, EPB41L1, MYH9	682	30	19256	3.76461	1	1	0.996986
GOTERM_BP_DIRECT	GO:0035914~skeletal muscle cell differentiation	5	0.686813	0.0890402	NOTCH1, KRAS, SOX11, ANKRD52, FOXN2	682	48	19256	2.9411	1	1	0.996986
GOTERM_BP_DIRECT	GO:0050885~neuromuscular process controlling balance	5	0.686813	0.0890402	CNTNAP1, NRXN1, ABL1, SHANK3, GIGYF2	682	48	19256	2.9411	1	1	0.996986
GOTERM_BP_DIRECT	GO:0034446~substrate adhesion-dependent cell spreading	5	0.686813	0.0890402	FER, FZD4, PEAK1, AXL, ABL1	682	48	19256	2.9411	1	1	0.996986
GOTERM_BP_DIRECT	GO:0007173~epidermal growth factor receptor signaling pathway	5	0.686813	0.0890402	ABL1, ABL2, PLCE1, PLCG1, PRICKLE1	682	48	19256	2.9411	1	1	0.996986
GOTERM_BP_DIRECT	GO:0007368~determination of left/right symmetry	6	0.824176	0.0924807	NOTCH1, KIF3B, AP1B1, DLL1, ACVR2B, BICC1	682	68	19256	2.49129	1	1	0.996986
GOTERM_BP_DIRECT	GO:0045930~negative regulation of mitotic cell cycle	4	0.549451	0.0953746	BRINP1, ABL1, GAS1, DGKZ	682	31	19256	3.64317	1	1	0.996986
GOTERM_BP_DIRECT	GO:0030534~adult behavior	4	0.549451	0.0953746	CNTNAP2, NRXN1, SLC7A11, SHANK3	682	31	19256	3.64317	1	1	0.996986
GOTERM_BP_DIRECT	GO:0042327~positive regulation of phosphorylation	4	0.549451	0.0953746	PDGFRA, GRB10, ITGA6, PPARGC1B	682	31	19256	3.64317	1	1	0.996986
GOTERM_BP_DIRECT	GO:0001578~microtubule bundle formation	4	0.549451	0.0953746	CLIP1, CAPN6, NAV1, MARK4	682	31	19256	3.64317	1	1	0.996986
GOTERM_BP_DIRECT	GO:0090102~cochlea development	4	0.549451	0.0953746	ADAM10, SLC17A8, SOBP, KCNK3	682	31	19256	3.64317	1	1	0.996986
GOTERM_BP_DIRECT	GO:0030878~thyroid gland development	4	0.549451	0.0953746	MAP2K1, SMAD3, MAPK1, HIPK2	682	31	19256	3.64317	1	1	0.996986
GOTERM_BP_DIRECT	GO:0014898~cardiac muscle hypertrophy in response to stress	3	0.412088	0.0968012	PPP3CA, SMAD4, GATA6	682	15	19256	5.64692	1	1	0.996986
GOTERM_BP_DIRECT	GO:0070306~lens fiber cell differentiation	3	0.412088	0.0968012	SMAD3, MAF, SLC7A11	682	15	19256	5.64692	1	1	0.996986
GOTERM_BP_DIRECT	GO:0033173~calcineurin-NFAT signaling cascade	3	0.412088	0.0968012	PPP3CA, NFATC2, NFATC1	682	15	19256	5.64692	1	1	0.996986
GOTERM_BP_DIRECT	GO:0003407~neural retina development	3	0.412088	0.0968012	GPM6A, CASP2, SLC17A8	682	15	19256	5.64692	1	1	0.996986
GOTERM_BP_DIRECT	GO:0022408~negative regulation of cell-cell adhesion	3	0.412088	0.0968012	EPB41L5, PODXL, ABL1	682	15	19256	5.64692	1	1	0.996986
GOTERM_BP_DIRECT	GO:2000767~positive regulation of cytoplasmic translation	3	0.412088	0.0968012	SYNCRIP, LIN28A, IGF2BP1	682	15	19256	5.64692	1	1	0.996986
GOTERM_BP_DIRECT	GO:0008286~insulin receptor signaling pathway	6	0.824176	0.0969717	FER, SMARCC1, GRB10, MAPK1, SOS2, IGF1R	682	69	19256	2.45518	1	1	0.996986
GOTERM_BP_DIRECT	GO:0016311~dephosphorylation	8	1.0989	0.0986965	PTPRT, PPM1A, PPP3CA, MTMR3, PTPRM, PTPN4, TNS3, PTPRG	682	111	19256	2.03493	1	1	0.996986
GOTERM_BP_DIRECT	GO:0071277~cellular response to calcium ion	7	0.961538	0.0992681	MEF2C, CAMK2D, SYT1, KCNB1, NRXN1, KCNQ3, NFATC2	682	90	19256	2.19602	1	1	0.996986

## Sheet: GO Term CC
Category	Term	Count	%	PValue	Genes	List Total	Pop Hits	Pop Total	Fold Enrichment	Bonferroni	Benjamini	FDR
GOTERM_CC_DIRECT	GO:0005829~cytosol	271	37.2253	5.15527e-11	GLTP, PANK2, AHCYL2, AHCYL1, DIXDC1, BACH1, ACTB, DCAF7, PCMT1, AS3MT, RASSF2, RASSF3, DPYSL4, PEG10, GPBP1, HABP4, PLCE1, BTRC, TNS3, SKP1, DDX17, MEF2C, GABARAPL1, WSB2, PRKCE, AP1B1, GOLPH3L, FRS2, YOD1, ANK2, ANK3, FNDC3A, RRAGC, DAAM1, PRKD3, PSME4, PRKD1, CLOCK, MTMR3, NEDD4L, MTMR9, BAZ2A, GIGYF2, EPB41L5, LARP1, RNF213, EPB41L1, MYO6, STK38L, TNRC18, PLCG1, PSMF1, ZNF268, PPARGC1A, PPARGC…	712	5537	20521	1.41063	3.02614e-08	3.02614e-08	2.90242e-08
GOTERM_CC_DIRECT	GO:0005634~nucleus	288	39.5604	1.08422e-10	PANK2, CCNJ, BACH1, ACTB, DCAF7, RASSF2, MCIDAS, RASSF3, PPP4R2, RASSF5, GPBP1, RAVER2, HABP4, DIP2B, HOXA7, CCNL1, BTRC, ATXN7L3, SKP1, ISY1-RAB43, DDX17, MEF2C, SMARCC1, ZFP1, ZNF282, SFMBT1, PRKCE, ZNF281, ZFP2, EBF1, RFX3, SOX11, RRAGC, PSME4, ZNF710, PRKD1, CLOCK, ZNF275, TSHZ2, GATA6, BAZ2A, MBTD1, ZNF704, MYO6, ZNF268, PPARGC1A, HOXC8, PPARGC1B, CDK17, RCC2, NFATC2, NFATC1, HSPA12A, TRERF1…	712	6021	20521	1.37861	6.36436e-08	3.18218e-08	3.05207e-08
GOTERM_CC_DIRECT	GO:0000785~chromatin	76	10.4396	1.36292e-08	CREBZF, THRB, BNC2, PPP1R10, UBP1, RORA, RORB, BACH1, ETS1, ACTB, PPP4R2, SIX4, TRPS1, HNF4A, POGZ, HOXA7, KLF12, SMARCC1, MYOCD, MEF2C, TGIF2, EBF1, RFX3, SOX11, PROX1, SIRT1, FOXP1, ELF1, MYCN, CREB1, MAF, ELF4, DMRTA1, TFEC, ERG, CHMP7, CLOCK, CREB5, DLX3, ZBTB46, SATB1, SATB2, TSHZ2, GATA6, CREBL2, NSD1, E2F3, MTA2, E2F5, PPARGC1A, HOXC8, HDX, SMAD4, POU2F1, SMAD3, FOXJ3, FOXJ2, HMGA1, NFATC2…	712	1097	20521	1.99676	8.00032e-06	2.66679e-06	2.55775e-06
GOTERM_CC_DIRECT	GO:0005654~nucleoplasm	193	26.511	2.81251e-07	BACH1, ACTB, DCAF7, RASSF2, PPP4R2, PEG10, HOXA7, BTRC, SKP1, ISY1-RAB43, DDX17, FNBP4, MEF2C, SMARCC1, SFMBT1, ZNF281, SOX11, RRAGC, PRKD3, PSME4, FAM76A, CLOCK, GATA6, NEDD4L, EPB41L5, MYO6, TNRC18, PSMF1, ZNF148, PPARGC1A, HOXC8, PPARGC1B, NFATC2, NFATC1, TRERF1, A1CF, ELL2, PBX1, FOSL2, AGO1, NAPEPLD, HBP1, CPEB3, CDK13, SLC44A1, PHF20, PPP1R10, PHF6, LIMD2, SYNCRIP, ING5, PPP3CA, HNF4A, ARIH…	712	3972	20521	1.40045	0.00016508	4.12735e-05	3.9586e-05
GOTERM_CC_DIRECT	GO:0010494~cytoplasmic stress granule	16	2.1978	1.18938e-06	DDX6, YTHDF2, DDX3X, RBPMS, LARP4, QKI, GIGYF2, HIPK2, DDX19B, LARP1, LIN28A, CAPRIN1, HABP4, IGF2BP1, IGF2BP3, TARDBP	712	97	20521	4.75408	0.000697921	0.000139633	0.000133924
GOTERM_CC_DIRECT	GO:0005794~Golgi apparatus	67	9.2033	8.62924e-06	CNTNAP2, MCFD2, SERPINA1, HIP1, UBXN2B, TMEM167A, ZFYVE1, WDR44, RAB43, NDST1, STS, RASSF2, AP1G1, PDGFRA, GABARAPL1, MAP2K1, GLCE, PRKCE, AP1B1, GOLPH3L, ADAM10, SORCS1, ANK3, ASH1L, FNDC3A, ZDHHC16, ZDHHC17, AFTPH, PRKD1, ST6GALNAC3, MYRF, NEDD4L, ZDHHC21, CLCN3, RASGRP1, GIGYF2, STRN3, CAMSAP2, JAKMIP2, ARHGAP21, GANAB, NRAS, FUT8, FGD6, FUT9, MYO6, NAA25, GCNT2, ST8SIA4, RHO, TBC1D14, MAPK1, …	712	1095	20521	1.76352	0.00505258	0.000844227	0.00080971
GOTERM_CC_DIRECT	GO:0005737~cytoplasm	247	33.9286	1.32608e-05	GLTP, AHCYL1, CCNJ, AQP4, BACH1, ACTB, DCAF7, PCMT1, RASSF2, RASSF3, PPP4R2, PEG10, RASSF5, RAVER2, HABP4, DIP2B, HMCN1, BTRC, SKP1, DDX17, MEF2C, SMARCC1, PRKCE, FRS2, ACSL4, YOD1, FNDC3A, KIAA1217, EML5, RRAGC, PRKD3, TBPL1, TLN2, PRKD1, CLOCK, NAIP, NUMBL, MTMR3, CEP85L, NEDD4L, MTMR9, LARP1, RNF213, MYO6, STK38L, PLCG1, PSMF1, ZNF268, CDK17, NFATC2, SUCO, NFATC1, HSPA12A, A1CF, PBX1, AGO4, AG…	712	5636	20521	1.26312	0.00775394	0.00111202	0.00106655
GOTERM_CC_DIRECT	GO:0098978~glutamatergic synapse	33	4.53297	2.25215e-05	PTPRT, GPM6A, CNTNAP1, HIP1, NRXN1, ADAM22, ABHD17C, CLCN3, LIN7C, ACTB, RAP1B, EEA1, PPP3CA, LRRTM3, FLOT2, STK38L, PLCG1, NTNG1, MPP2, EPHA7, SYT1, KCND2, FZD4, GRID1, ADAM10, NSG1, SORCS3, SLC4A8, DLG3, SLC9A6, CDH11, NOS1AP, SHANK3	712	415	20521	2.29184	0.0131332	0.00159587	0.00153062
GOTERM_CC_DIRECT	GO:0005912~adherens junction	20	2.74725	2.44681e-05	MPP2, NOTCH1, PTPRM, ADAM10, FRS2, FRMD4B, DLL1, ACTB, EPB41L5, CYTH2, FER, FRMD5, DLG3, CCDC85A, CDH11, FLOT2, MYH9, ITGA6, HMCN1, VCL	712	185	20521	3.11585	0.0142603	0.00159587	0.00153062
GOTERM_CC_DIRECT	GO:0030425~dendrite	34	4.67033	3.10033e-05	HCN3, CNTNAP2, AMIGO1, HTR2C, PPP1R9A, STRN3, TRIM9, BRINP1, ALCAM, KIF3B, GRM7, ABL1, SACS, DIP2B, MARK4, SLC38A2, RCVRN, EPHA7, KCND2, FZD4, KCNB1, MAGI2, ADAM10, ANK3, NSG1, SLC4A8, ALS2, SLC9A6, DMWD, CAPRIN1, FAT3, MAPT, CPEB3, BMPR1A	712	441	20521	2.22208	0.0180346	0.0018199	0.00174549
GOTERM_CC_DIRECT	GO:0043197~dendritic spine	18	2.47253	3.87589e-05	MPP2, GPM6A, KCND2, KCNA4, ABHD17C, PPP1R9A, TANC2, PPP3CA, ABHD17B, ALS2, KIF3B, IGF2BP1, DIP2A, MAPT, CPEB3, ASIC2, SHANK3, LZTS3	712	159	20521	3.26283	0.022495	0.00206831	0.00198375
GOTERM_CC_DIRECT	GO:0015629~actin cytoskeleton	23	3.15934	0.000119548	AUTS2, TPM3, CASK, PPP1R9A, ARHGAP6, CORO2B, ACTB, MTSS1, LIMD2, AKAP13, ARHGAP21, FER, AXL, PEAK1, MYO6, ABL1, STK38L, MYH9, ABL2, FLNB, TLN2, WASF1, DGKH	712	261	20521	2.53984	0.0677731	0.0058479	0.00560881
GOTERM_CC_DIRECT	GO:0098685~Schaffer collateral - CA1 synapse	13	1.78571	0.000145101	NTNG1, MPP2, HIP1, NRXN1, CASK, ACTB, EEA1, PPP3CA, SLC9A6, CDH11, PPFIA1, PLCG1, INA	712	98	20521	3.82328	0.0816536	0.00655188	0.006284
GOTERM_CC_DIRECT	GO:0005667~transcription factor complex	20	2.74725	0.000313927	SMAD4, SMAD3, LMO4, SATB2, LEF1, GATA6, HMGA1, NFATC2, RFX3, NFATC1, KLF4, TRERF1, SMAD5, NR4A2, NR4A3, SIX4, E2F3, MTA2, E2F5, CLOCK	712	224	20521	2.57336	0.168317	0.0131625	0.0126243
GOTERM_CC_DIRECT	GO:0090575~RNA polymerase II transcription factor complex	14	1.92308	0.000403302	CREBZF, SMAD4, POU2F1, THRB, LMO4, HMGA1, BACH1, PBX1, HIPK2, FOSL2, CREB1, MAF, E2F3, E2F5	712	125	20521	3.22802	0.21084	0.0157825	0.0151373
GOTERM_CC_DIRECT	GO:0005925~focal adhesion	30	4.12088	0.000487677	CLTC, DIXDC1, ACTB, RAB21, EPB41L5, ALCAM, RRAS, PPFIA1, FLOT2, MAPK1, ITGB8, FLNB, WASF1, TNS3, GIT1, MPZL1, MAP2K1, YES1, HMGA1, ADAM10, CASK, ARHGAP26, CORO2B, PPFIBP1, PEAK1, MYH9, KRAS, ITGA6, TLN2, VCL	712	428	20521	2.02021	0.24899	0.0178917	0.0171601
GOTERM_CC_DIRECT	GO:0000139~Golgi membrane	42	5.76923	0.000571298	ATP6V1A, NOTCH1, TMEM167A, XYLT1, ZDHHC21, CABP1, CLCN3, RASGRP1, RAB21, NDST1, LMAN1, ARHGAP21, CYTH2, NRAS, FUT8, FUT9, AP1G1, MGAT3, GCNT2, ST8SIA4, RHO, PLCE1, SLC30A8, WSCD2, GLCE, SURF4, AP1B1, GOLPH3L, ADAM10, FNDC3A, ZDHHC17, CBFA2T3, SORL1, TAPBP, STK24, MGAT4A, NAPEPLD, YIPF6, KRAS, ACBD3, ST6GALNAC3, ITM2B	712	689	20521	1.75691	0.284982	0.0189118	0.0181385
GOTERM_CC_DIRECT	GO:0001726~ruffle	12	1.64835	0.000579918	CLIP1, FGD6, CDK6, ALS2, PODXL, MYO6, ABL1, MYH9, PLCG1, TLN2, FRMD4B, MTSS1	712	98	20521	3.52918	0.288593	0.0189118	0.0181385
GOTERM_CC_DIRECT	GO:0008023~transcription elongation factor complex	6	0.824176	0.000793579	NUFIP1, ERCC6, MLLT3, AFF4, ELL2, AFF1	712	22	20521	7.86044	0.372503	0.0244452	0.0234457
GOTERM_CC_DIRECT	GO:0045202~synapse	33	4.53297	0.000832886	RGS17, NRN1, CACNA1A, HTR2C, STON2, LIN7C, CACNA1E, ACTB, HAPLN1, RAB21, CHN2, MAPK1, GIT1, LZTS3, KCMF1, EIF5B, PRKCE, TMOD2, MAGI2, GABRA3, MYRIP, QKI, CAPRIN1, KCNQ3, PLP1, RGS10, CNTN2, TLN2, PDE7B, CPEB3, KCNK3, SDK2, SCN2B	712	506	20521	1.87967	0.386827	0.0244452	0.0234457
GOTERM_CC_DIRECT	GO:0043194~axon initial segment	6	0.824176	0.000985357	ADAM22, KCNQ3, CNTN2, KCNA4, NAV1, ANK3	712	23	20521	7.51869	0.439367	0.0275431	0.0264169
GOTERM_CC_DIRECT	GO:0005856~cytoskeleton	33	4.53297	0.001553	PLEKHH2, HIP1, CABP1, PPP1R9A, ADD3, ACTB, ADD2, EPB41L5, TRIM9, FGD6, EPB41L1, MAPK1, FLNB, WASF1, TRIM67, LZTS3, MPP2, AUTS2, TPM3, PRKCE, TMOD2, KLHL3, ANK2, ANK3, FRMD4B, ARHGAP26, FER, CLIP1, FRMD5, GAN, DCX, PTPN4, VCL	712	526	20521	1.8082	0.598408	0.0414368	0.0397426
GOTERM_CC_DIRECT	GO:0016020~membrane	230	31.5934	0.00170691	CNTFR, PANK2, TMEM200B, XYLT1, AQP4, ZFYVE1, ACTB, SCAMP4, NDST1, ALCAM, STS, PEG10, DIP2A, DIP2B, DDX17, GABARAPL1, EPHA7, ALG9, KCNK10, ACSL1, FNDC3B, FRS2, ACSL4, MOGS, ANK2, ANK3, FNDC3A, FNDC5, BCAM, RRAGC, DAAM1, PRKD3, KCNQ3, KCNQ5, FAR1, PRKD1, GPM6A, MTMR3, IGSF1, GIGYF2, LARP1, RNF213, MYO6, STK38L, PSMF1, VAT1, RCC2, SUCO, LARP4, AGO4, TMCC3, FAT3, FAT4, DCP1A, ITM2B, MRS2, DDR1, PTPRT…	712	5595	20521	1.1848	0.633153	0.0435633	0.0417822
GOTERM_CC_DIRECT	GO:0036464~cytoplasmic ribonucleoprotein granule	10	1.37363	0.00228529	UPF2, DDX6, YTHDF2, AGO4, AGO1, RBM20, MAPT, DCP1A, INA, ACTB	712	83	20521	3.47249	0.738939	0.0558944	0.0536091
GOTERM_CC_DIRECT	GO:0000932~P-body	11	1.51099	0.00245132	DDX6, YTHDF2, LIN28A, RBPMS, AGO4, AGO1, CAPRIN1, IGF2BP1, IGF2BP3, DCP1A, TNRC6B	712	100	20521	3.17038	0.763236	0.057557	0.0552037
GOTERM_CC_DIRECT	GO:0030027~lamellipodium	16	2.1978	0.00275819	PLEKHH2, DDX3X, PTPRM, DGKZ, ACTB, FER, FGD6, ALS2, PODXL, CAPRIN1, IGF2BP1, FLOT2, PLCE1, PLCG1, WASF1, GIT1	712	191	20521	2.41438	0.802358	0.0622716	0.0597255
GOTERM_CC_DIRECT	GO:0043235~receptor complex	17	2.33516	0.0028845	DDR1, PDGFRA, CR2, NOTCH1, SMAD3, GPR63, PRLR, ACVR2B, LRP1B, IGF1R, PEX5L, GRM7, AXL, ITGB8, MET, IL6R, BMPR1A	712	211	20521	2.32212	0.816519	0.0627111	0.0601471
GOTERM_CC_DIRECT	GO:0009898~cytoplasmic side of plasma membrane	11	1.51099	0.00488666	RAB21, PPP3CA, FER, STAC, TRAF3, MYH9, ESYT3, KRAS, SAMD12, PTPN4, CHMP7	712	110	20521	2.88216	0.943612	0.102445	0.0982568
GOTERM_CC_DIRECT	GO:0098839~postsynaptic density membrane	10	1.37363	0.00607179	PTPRT, MPP2, ABHD17B, LRRTM3, DLG3, GRID1, ADAM22, ABHD17C, SORCS3, LIN7C	712	96	20521	3.00225	0.971985	0.122901	0.117877
GOTERM_CC_DIRECT	GO:0005891~voltage-gated calcium channel complex	6	0.824176	0.00856854	PDE4D, SCN9A, CACHD1, CACNA1A, CACNA1D, CACNA1E	712	37	20521	4.67378	0.9936	0.167658	0.160803
GOTERM_CC_DIRECT	GO:0042383~sarcolemma	10	1.37363	0.0120413	PPP3CA, CAMK2D, STAC, KCNB1, NOS1AP, AQP4, ANK2, ANK3, SLC38A2, VCL	712	107	20521	2.69361	0.999184	0.228007	0.218685
GOTERM_CC_DIRECT	GO:0005911~cell-cell junction	14	1.92308	0.0135904	MPP2, FZD4, MAGI2, PTPRM, CASK, FRS2, ADD3, LIN7C, ACTB, RAP1B, RHO, PRKD1, PLCG1, VCL	712	187	20521	2.15777	0.999675	0.236798	0.227117
GOTERM_CC_DIRECT	GO:0005903~brush border	7	0.961538	0.0137306	MYH9, FLNB, PDZK1, ADD3, SLC38A2, VCL, ACTB	712	57	20521	3.5395	0.999701	0.236798	0.227117
GOTERM_CC_DIRECT	GO:0032588~trans-Golgi network membrane	10	1.37363	0.0142466	RAB43, SCAMP4, NDST1, AFTPH, FUT9, AP1G1, CLTC, AP1B1, GOLPH3L, NSG1	712	110	20521	2.62015	0.99978	0.236798	0.227117
GOTERM_CC_DIRECT	GO:0030315~T-tubule	6	0.824176	0.0145226	STAC, NOS1AP, ANK2, ANK3, SCN2B, IGF1R	712	42	20521	4.11738	0.999814	0.236798	0.227117
GOTERM_CC_DIRECT	GO:0048786~presynaptic active zone	6	0.824176	0.0145226	PPFIBP1, CNTNAP1, RIMS3, NUFIP1, GRM7, PPFIA1	712	42	20521	4.11738	0.999814	0.236798	0.227117
GOTERM_CC_DIRECT	GO:0032809~neuronal cell body membrane	5	0.686813	0.0170504	SLC4A8, KCNC1, KCND2, KCNB1, AMIGO1	712	29	20521	4.96925	0.999959	0.270502	0.259443
GOTERM_CC_DIRECT	GO:0042995~cell projection	13	1.78571	0.0190681	PPP1R16B, ANGPT2, CEP350, NRXN1, CACNA1A, ZDHHC17, FER, SH3PXD2A, GJA5, DCX, PLCG1, TNS3, VCL	712	175	20521	2.14104	0.999988	0.294551	0.282508
GOTERM_CC_DIRECT	GO:0043005~neuron projection	19	2.60989	0.0220413	MPP2, GPM6A, RGS17, CAMK2D, AHCYL2, SYT1, TENM4, GABRA3, ANK2, ANK3, STON2, SLC4A8, DLG3, DCX, MAPT, CPEB3, MARK4, SHANK3, GIT1	712	308	20521	1.77796	0.999998	0.329036	0.315583
GOTERM_CC_DIRECT	GO:0071141~SMAD protein complex	3	0.412088	0.0224215	SMAD4, SMAD3, SMAD5	712	7	20521	12.3521	0.999998	0.329036	0.315583
GOTERM_CC_DIRECT	GO:0044305~calyx of Held	4	0.549451	0.0265359	KCNC1, KCNQ5, GIT1, ACTB	712	19	20521	6.06771	1	0.379917	0.364384
GOTERM_CC_DIRECT	GO:0036057~slit diaphragm	3	0.412088	0.0292168	PPP3CA, PODXL, MAGI2	712	8	20521	10.8081	1	0.398843	0.382536
GOTERM_CC_DIRECT	GO:0071144~SMAD2-SMAD3 protein complex	3	0.412088	0.0292168	SMAD4, SMAD3, SMAD5	712	8	20521	10.8081	1	0.398843	0.382536
GOTERM_CC_DIRECT	GO:0008076~voltage-gated potassium channel complex	8	1.0989	0.0312631	CNTNAP2, KCNC1, KCND2, KCNB1, AMIGO1, KCNQ3, KCNA4, KCNQ5	712	87	20521	2.65026	1	0.417078	0.400026
GOTERM_CC_DIRECT	GO:0016604~nuclear body	20	2.74725	0.0324917	AMER1, PLEKHH2, THRB, SATB1, PPP1R10, CRTC1, CELF3, NFATC1, STK4, DCAF7, HIPK2, GON4L, MCIDAS, ELF4, PAPOLG, RGS10, ABL1, MYH9, ERCC6, ARIH1	712	345	20521	1.67082	1	0.423837	0.406508
GOTERM_CC_DIRECT	GO:0044233~ER-mitochondrion membrane contact site	4	0.549451	0.0390785	AHCYL1, TMX1, ACSL4, ZFYVE1	712	22	20521	5.2403	1	0.492537	0.472399
GOTERM_CC_DIRECT	GO:0030424~axon	20	2.74725	0.0394365	HCN3, CNTNAP2, SYT1, KCNB1, ADAM22, ADAM10, KCNA4, TANC2, ACTB, IGF1R, ALCAM, CALCR, GRM7, SCN9A, SACS, PPFIA1, CNTN2, MAPT, DIP2B, SLC38A2	712	353	20521	1.63295	1	0.492537	0.472399
GOTERM_CC_DIRECT	GO:0032991~macromolecular complex	34	4.67033	0.0409944	KHDRBS1, NUFIP1, CRYBG3, NRXN1, ZC4H2, NPR3, CLTC, MTMR9, STK4, GIGYF2, ACTB, DCAF7, STRN3, RASSF2, TRPS1, GRB10, ABL1, PPFIA1, CASP2, MTA2, WASF1, PDGFRA, SMARCC1, MEF2C, MAGI2, ERLIN1, ACVR2B, SMAD5, NR4A2, FER, ALS2, MYH9, VCL, DGKH	712	692	20521	1.41609	1	0.501327	0.48083
GOTERM_CC_DIRECT	GO:0005769~early endosome	18	2.47253	0.0449577	CNTNAP2, MAP2K1, RNF11, VPS4A, AP1B1, SNX12, ECE1, ANK2, CLCN3, SORL1, RAB21, EEA1, SLC9A6, ALS2, SNX16, AP1G1, NAPEPLD, MAPK1	712	312	20521	1.66279	1	0.538575	0.516555
GOTERM_CC_DIRECT	GO:0045211~postsynaptic membrane	13	1.78571	0.0477694	HIP1, KCNC1, KCND2, KCNB1, GRID1, ZC4H2, GABRA3, ANK2, ANK3, NSG1, GRM7, CNTN2, SHANK3	712	201	20521	1.86409	1	0.560813	0.537884
GOTERM_CC_DIRECT	GO:0000502~proteasome complex	6	0.824176	0.050071	PSMD11, TXNL1, PSME4, PSMF1, PRICKLE1, RAD23B	712	58	20521	2.98155	1	0.574129	0.550655
GOTERM_CC_DIRECT	GO:0043025~neuronal cell body	20	2.74725	0.0508598	GPM6A, HCN3, CNTNAP2, KCND2, NRXN1, ZC4H2, CACNA1A, CACNA1E, SORL1, STRN3, IGF1R, SLC25A27, BRINP1, ALCAM, IGF2BP1, ABL1, MAPT, ASIC2, SLC38A2, BMPR1A	712	364	20521	1.58361	1	0.574129	0.550655
GOTERM_CC_DIRECT	GO:0030175~filopodium	7	0.961538	0.058962	GPM6A, PODXL, MYO6, NOS1AP, IGF2BP1, ITGA6, PPP1R9A	712	80	20521	2.52189	1	0.653032	0.626332
GOTERM_CC_DIRECT	GO:0005938~cell cortex	11	1.51099	0.0616267	AKAP13, FER, CLIP1, GRM7, MYO6, FLNB, HMCN1, PRKD1, CABP1, FGF1, ADD3	712	165	20521	1.92144	1	0.669905	0.642515
GOTERM_CC_DIRECT	GO:0032590~dendrite membrane	4	0.549451	0.0654385	MPP2, KCNC1, KCNB1, GABRA3	712	27	20521	4.26987	1	0.698407	0.669852
GOTERM_CC_DIRECT	GO:1990030~pericellular basket	2	0.274725	0.0680961	AMIGO1, SLC17A8	712	2	20521	28.8216	1	0.705698	0.676845
GOTERM_CC_DIRECT	GO:0031965~nuclear membrane	15	2.06044	0.0713374	RANBP2, PHF20, NRXN1, SURF4, GATA6, PRICKLE1, SENP2, SCRN1, MYO6, NOS1AP, HABP4, ABL1, KPNA4, TNRC18, HOXA7	712	261	20521	1.65642	1	0.705698	0.676845
GOTERM_CC_DIRECT	GO:0030121~AP-1 adaptor complex	3	0.412088	0.0726399	AFTPH, AP1G1, AP1B1	712	13	20521	6.65115	1	0.705698	0.676845
GOTERM_CC_DIRECT	GO:0044224~juxtaparanode region of axon	3	0.412088	0.0726399	MPP2, CNTNAP2, CNTN2	712	13	20521	6.65115	1	0.705698	0.676845
GOTERM_CC_DIRECT	GO:0014069~postsynaptic density	14	1.92308	0.0735446	MPP2, MAGI2, ADAM10, CABP1, PPP1R9A, ADD3, ADD2, ABHD17B, ALS2, HNRNPH2, CPEB3, SHANK3, GIT1, LZTS3	712	239	20521	1.6883	1	0.705698	0.676845
GOTERM_CC_DIRECT	GO:0010008~endosome membrane	16	2.1978	0.0740288	ATP6V1A, NOTCH1, VPS4A, ARHGAP1, ECE1, AQP4, ABHD17C, ARHGAP26, CLCN3, SORL1, WDR44, ARHGAP21, ABHD17B, SNX16, TRAF3, ITM2B	712	286	20521	1.6124	1	0.705698	0.676845
GOTERM_CC_DIRECT	GO:0016328~lateral plasma membrane	7	0.961538	0.0745371	SLC4A7, SLC4A8, ABCC1, KCNB1, ANK3, NSG1, LIN7C	712	85	20521	2.37355	1	0.705698	0.676845
GOTERM_CC_DIRECT	GO:0016363~nuclear matrix	9	1.23626	0.0798375	SMARCC1, ATXN1, NUFIP1, SATB1, ATXN7, SATB2, CASK, ACTB, DCAF7	712	129	20521	2.01081	1	0.743882	0.713468
GOTERM_CC_DIRECT	GO:0005923~bicellular tight junction	9	1.23626	0.0826387	CYTH2, DLG3, MAGI2, ILDR2, ANK3, AMOTL1, ASH1L, FRMD4B, LIN7C	712	130	20521	1.99534	1	0.748275	0.717681
GOTERM_CC_DIRECT	GO:1990531~Lem3p-Dnf1p complex	3	0.412088	0.0828584	ATP8B4, ATP11C, ATP10A	712	14	20521	6.17606	1	0.748275	0.717681
GOTERM_CC_DIRECT	GO:0005770~late endosome	10	1.37363	0.0850773	MAP2K1, SNX16, EXOC8, SLC9A6, MAGI2, VPS4A, MAPK1, NSG1, CLCN3, RAB9B	712	153	20521	1.88377	1	0.756672	0.725735
GOTERM_CC_DIRECT	GO:0048471~perinuclear region of cytoplasm	34	4.67033	0.0879529	VPS4A, ARHGAP1, PTPRM, MTMR9, ECE1, CABP1, ZFYVE1, WDR44, ARHGAP21, CAPN6, AP1G1, MYO6, IGF2BP1, ABL1, FLOT2, PSMF1, PPP1R16B, UPF2, TPD52, EXOC8, KCNB1, PRKCE, PDE4D, MAGI2, NFATC1, MYRIP, PER2, AFTPH, DAAM1, TAOK1, NOS1AP, PRKD1, PDE7B, CPEB3	712	745	20521	1.31535	1	0.770573	0.739067
GOTERM_CC_DIRECT	GO:0005778~peroxisomal membrane	6	0.824176	0.0908005	FNDC5, PEX5L, ACSL1, AGPS, ACSL4, FAR1	712	69	20521	2.50623	1	0.783822	0.751775
GOTERM_CC_DIRECT	GO:0042734~presynaptic membrane	9	1.23626	0.0975029	SLC4A8, HIP1, RIMS3, KCNC1, SYT1, NRXN1, CASK, KCNQ5, ZDHHC17	712	135	20521	1.92144	1	0.791091	0.758746
GOTERM_CC_DIRECT	GO:0000151~ubiquitin ligase complex	8	1.0989	0.0977625	RNF11, RMND5A, TRAF3, RANBP10, UBE2E1, UBR3, ARIH1, ASB1	712	113	20521	2.04047	1	0.791091	0.758746
GOTERM_CC_DIRECT	GO:0043204~perikaryon	10	1.37363	0.0989069	MPP2, CNTNAP2, RCVRN, KCND2, KCNB1, DMWD, AMIGO1, SLC17A8, DIP2B, GIGYF2	712	158	20521	1.82415	1	0.791091	0.758746

## Sheet: GO Term MF
Category	Term	Count	%	PValue	Genes	List Total	Pop Hits	Pop Total	Fold Enrichment	Bonferroni	Benjamini	FDR
GOTERM_MF_DIRECT	GO:0005515~protein binding	563	77.3352	5.16678e-16	CNTFR, ZFYVE1, BACH1, DCAF7, NDST1, SCAMP4, PCMT1, ALCAM, DPYSL4, PPP4R2, GJA5, GPBP1, PLCE1, DIP2A, HOXA7, DDX17, FNBP4, MEF2C, GABARAPL1, PRKCE, ZNF281, SERPINF2, RFX3, FRS2, PDZK1, BCAM, DAAM1, PRKD3, PSME4, TBPL1, FAR1, PRKD1, CLOCK, ZNF275, MTMR3, GATA6, MTMR9, NEDD4L, BAZ2A, GIGYF2, EPB41L5, GJC3, LARP1, EPB41L1, MYO6, PLCG1, PSMF1, ZNF148, HOXC8, PPARGC1A, CDK17, FZD4, ERLIN1, NFATC2, NFAT…	697	12707	18883	1.20034	4.62408e-13	4.30392e-13	4.22642e-13
GOTERM_MF_DIRECT	GO:0003700~transcription factor activity, sequence-specific DNA binding	58	7.96703	1.04739e-10	CREBZF, THRB, UBP1, RORA, RORB, BACH1, ETS1, TRPS1, HNF4A, GPBP1, ZNF329, ZNF687, KLF12, MEF2C, TGIF2, ZNF282, ZNF281, EBF1, RFX3, SOX11, PROX1, FOXP1, ELF1, MYCN, CREB1, MAF, ERG, ZNF710, CLOCK, CREB5, DLX3, MYRF, PLAG1, LEF1, GATA6, CREBL2, STOX2, ZNF704, PLAGL2, E2F3, ZNF148, E2F5, ZNF268, SMAD4, SMAD3, FOXJ3, NFATC2, NFATC1, FOXN3, FOXN2, KLF4, SMAD5, PBX1, FOSL2, ZNF618, TEF, NFIC, NFE2L1	697	609	18883	2.58017	8.72473e-08	4.36236e-08	4.28381e-08
GOTERM_MF_DIRECT	GO:0003677~DNA binding	88	12.0879	2.08726e-07	CREBZF, RNF11, THRB, DDX3X, PPP1R10, PHF20, HP1BP3, UBP1, ARID4B, RORA, BACH1, ETS1, PHF6, SIX4, ZMYM4, PEG10, HNF4A, GPBP1, ZNF329, POGZ, ZNF687, KLF12, CR2, MEF2C, TGIF2, CERS6, TET2, EBF1, TET1, RFX3, SOX11, ASH1L, PROX1, TSN, HIC2, MYCN, CREB1, MAF, TBPL1, ERG, MAPT, CLOCK, CREB5, GTF2A1, KHDRBS1, DLX3, UHRF2, MYRF, SATB1, SATB2, TSHZ2, LEF1, GATA6, BAZ2A, CREBL2, ZBTB44, MLLT3, ORC4, ATXN1, …	697	1350	18883	1.76599	0.000173854	5.79563e-05	5.69127e-05
GOTERM_MF_DIRECT	GO:0000981~RNA polymerase II transcription factor activity, sequence-specific DNA binding	81	11.1264	1.04933e-06	CREBZF, THRB, ZNF570, UBP1, RORA, RORB, BACH1, ETS1, SIX4, HNF4A, ZNF644, HOXA7, KLF12, MEF2C, TGIF2, ZFP1, ZNF281, ZFP2, EBF1, RFX3, SOX11, PROX1, FOXP1, ELF1, MYCN, CREB1, MAF, ELF4, DMRTA1, TFEC, ZNF439, ERG, CLOCK, CREB5, ZNF275, DLX3, MYRF, ZBTB46, SATB1, PLAG1, SATB2, TSHZ2, LEF1, GATA6, CREBL2, PURB, ZNF627, ZKSCAN8, ZNF547, PLAGL2, E2F3, ZNF304, E2F5, HOXC8, HDX, ZNF584, ZNF583, SMAD4, PO…	697	1255	18883	1.74856	0.000873713	0.000218524	0.000214589
GOTERM_MF_DIRECT	GO:0000978~RNA polymerase II core promoter proximal region sequence-specific DNA binding	76	10.4396	1.90662e-06	THRB, ZNF570, UBP1, RORA, RORB, BACH1, ETS1, SIX4, HNF4A, ZNF644, HOXA7, KLF12, MEF2C, TGIF2, ZFP1, ZNF281, ZFP2, EBF1, RFX3, SOX11, PROX1, SIRT1, RAD23B, FOXP1, HIC2, ELF1, MYCN, CREB1, MAF, ELF4, DMRTA1, TFEC, ERG, ZNF710, CLOCK, ZNF275, DLX3, SATB1, PLAG1, SATB2, LEF1, GATA6, ZNF704, NSD1, ZKSCAN8, ZNF547, E2F3, ZNF304, ZNF148, ZNF544, E2F5, ZNF268, HDX, ZNF584, ZNF583, SMAD4, POU2F1, SMAD3, F…	697	1170	18883	1.75981	0.00158695	0.000274443	0.000269501
GOTERM_MF_DIRECT	GO:1990837~sequence-specific double-stranded DNA binding	45	6.18132	1.97678e-06	DLX3, THRB, LEF1, GATA6, UBP1, RORB, ETS1, SIX4, ZNF704, HNF4A, ABL1, E2F3, HOXA7, HOXC8, KLF12, MEF2C, TGIF2, ZFP1, ZNF282, ZNF281, FOXJ3, FOXJ2, NFATC2, RFX3, NFATC1, PROX1, FOXN2, KLF4, SMAD5, PBX1, FOXP1, NR4A2, ELF1, LIN28B, MYCN, CREB1, MAF, TEF, ELF4, DMRTA1, NFIC, TFEC, ERG, CLOCK, CREB5	697	559	18883	2.18092	0.0016453	0.000274443	0.000269501
GOTERM_MF_DIRECT	GO:0043565~sequence-specific DNA binding	32	4.3956	2.46686e-06	THRB, CBFB, MYRF, SATB1, LEF1, RORA, RORB, ETS1, HNF4A, TRPS1, PLAGL2, E2F3, MTA2, HOXA7, ZNF148, PPARGC1A, SMAD4, POU2F1, SMAD3, ZNF281, FOXJ3, FOXJ2, FOXN3, FOXN2, TSN, FOXP1, NR4A2, ELF1, ERCC6, ERG, MAPT, CLOCK	697	334	18883	2.59562	0.00205278	0.000293556	0.00028827
GOTERM_MF_DIRECT	GO:0001228~transcriptional activator activity, RNA polymerase II transcription regulatory region sequence-specific binding	40	5.49451	6.59324e-06	DLX3, NOTCH1, PLAG1, SATB2, LEF1, UBP1, RORB, ETS1, BACH1, SIX4, HNF4A, PLAGL2, E2F3, HOXA7, ZNF544, ZNF268, MEF2C, SMAD4, POU2F1, SMAD3, FOXJ3, FOXJ2, NFATC2, SOX11, NFATC1, KLF4, PBX1, FOSL2, NR4A2, ELF1, MYCN, NR4A3, CREB1, MAF, TEF, ELF4, NFIC, TFEC, ERG, CLOCK	697	493	18883	2.19812	0.00547713	0.000686521	0.000674159
GOTERM_MF_DIRECT	GO:0003729~mRNA binding	25	3.43407	1.36877e-05	KHDRBS1, DDX6, RBM47, DDX3X, CELF3, MSI2, PURB, PEG10, IGF2BP1, SPEN, YTHDF2, MYEF2, RBPMS, THOC2, A1CF, TSN, QKI, PTBP3, DDX19B, LIN28B, LIN28A, CAPRIN1, NOVA2, RBM20, DCP1A	697	245	18883	2.76447	0.0113372	0.00126687	0.00124406
GOTERM_MF_DIRECT	GO:0008013~beta-catenin binding	13	1.78571	0.000112624	PTPRT, AMER1, AMER2, SMAD3, CTNNBIP1, LEF1, RORA, KLF4, NR4A2, TBL1XR1, BTRC, VCL, SKP1	697	90	18883	3.91326	0.0895544	0.00938158	0.00921265
GOTERM_MF_DIRECT	GO:0046872~metal ion binding	135	18.544	0.000401638	ZNF570, XYLT1, ZFYVE1, STS, RASSF3, PAPOLG, RASSF5, ZNF329, POGZ, PLCE1, ZNF687, ATXN7L3, TNS3, ZFP1, LMO4, ZNF282, PRKCE, ZNF281, ZFP2, EBF1, ADAM10, YOD1, DGKZ, PRLR, FOXP1, PYGO1, HIC2, PRKD3, ZNF439, ZNF710, PRKD1, NAIP, DGKH, ZNF275, MTMR3, ZC4H2, TSHZ2, CACNA1A, CACNA1D, BAZ2A, CACNA1E, RNF213, ZNF704, ZKSCAN8, ZNF547, ZNF304, ZNF148, ZNF544, ZNF268, SMAD4, SMAD3, BRPF3, STAC, TRERF1, SMAD5…	697	2760	18883	1.32514	0.284398	0.0304149	0.0298673
GOTERM_MF_DIRECT	GO:0031267~small GTPase binding	24	3.2967	0.000562825	RANBP2, RTKN, EXOC8, DENND5B, RCC2, ARHGAP1, MYRIP, SORL1, STRN3, WDR44, FMNL3, AKAP13, PEX5L, IPO8, FGD6, RIMS3, ALS2, DAAM1, KIF3B, AP1G1, SGSM2, PLCE1, WASF1, GIT1	697	293	18883	2.21913	0.374351	0.0390695	0.0383659
GOTERM_MF_DIRECT	GO:0061629~RNA polymerase II sequence-specific DNA binding transcription factor binding	17	2.33516	0.00139813	SPEN, GTF2A1, MEF2C, MYOCD, SMAD4, SMAD3, UHRF2, NFATC1, KLF4, STK4, ETS1, RAD23B, HIPK2, CREB1, HNF4A, MTA2, PPARGC1A	697	185	18883	2.48952	0.688219	0.0895877	0.0879744
GOTERM_MF_DIRECT	GO:0001222~transcription corepressor binding	8	1.0989	0.00200189	PER2, SMAD4, SMAD3, LEF1, RORA, ZNF644, ETS1, PBX1	697	49	18883	4.42315	0.811611	0.119112	0.116967
GOTERM_MF_DIRECT	GO:0005524~ATP binding	79	10.8516	0.00243051	DDR1, PANK2, DDX3X, ACTB, IGF1R, PAPOLG, DDX17, PDGFRA, CSNK1G3, ABCC1, MAP2K1, RPS6KL1, EPHA7, CAMK1D, ACSL1, DCAKD, MARS2, PRKCE, UBE2E3, UBE2E1, ATP11C, CASK, ACSL4, DGKZ, DDX19B, NAV3, PRKD3, MYH9, PRKD1, MET, NAIP, DGKH, ATP6V1A, DDX6, CAMK2D, UBA6, VPS4A, TRANK1, ATP10A, STK4, CLCN3, PAPSS2, ORC4, RNF213, NUAK2, KIF3B, MYO6, ABL1, ABL2, MAPK1, STK38L, MARK4, MAPK4, CDK17, ATP8B4, YES1, MAP3…	697	1540	18883	1.38978	0.86828	0.134974	0.132544
GOTERM_MF_DIRECT	GO:0000976~transcription regulatory region sequence-specific DNA binding	19	2.60989	0.00294543	MEF2C, SMAD4, DLX3, SMAD3, ZBTB46, ZNF281, GATA6, RFX3, SOX11, ARID4B, PROX1, KLF4, ETS1, PBX1, PER2, TBL1XR1, RBBP5, HNF4A, ZNF579	697	236	18883	2.18112	0.914322	0.153346	0.150585
GOTERM_MF_DIRECT	GO:0003779~actin binding	24	3.2967	0.00392832	PLEKHH2, HIP1, TPM3, TMOD2, DIXDC1, KLHL3, MYRIP, VASH1, CORO2B, MTSS1, ADD2, FMNL3, DAAM1, CLMN, EPB41L1, MYO6, STK38L, MYH9, FLNB, MAPT, TLN2, WASF1, SHANK3, VCL	697	340	18883	1.91236	0.962324	0.192488	0.189022
GOTERM_MF_DIRECT	GO:0004672~protein kinase activity	26	3.57143	0.00456897	DDR1, CAMK2D, STK4, RASSF2, NUAK2, ABL1, ABL2, STK38L, MARK4, CDK17, PDGFRA, CSNK1G3, MAP2K1, RPS6KL1, MAP3K1, PRKCE, CASK, HIPK2, TBCK, STK24, PEAK1, TAOK1, CAMK4, CDK1, CDK13, MET	697	385	18883	1.82958	0.977955	0.211442	0.207634
GOTERM_MF_DIRECT	GO:0008270~zinc ion binding	49	6.73077	0.00540071	CPM, RNF11, THRB, BNC2, RORA, ECE1, RORB, ZFYVE1, PTPRG, EEA1, TRIM9, ZMYM4, TRIM2, PEG10, TRPS1, HNF4A, ARIH1, ATXN7L3, TRIM67, KCMF1, SLC30A8, ZNF282, TET2, TET1, MYRIP, CLIP1, MMP16, TRAF3, RBM20, SHANK3, GATA6, UBR3, PRICKLE1, RASGRP1, MBTD1, NSD1, VAT1, MAP3K1, SMAD3, KLF4, ZFHX4, NR4A2, SLC4A8, LIN28B, NR4A3, LIN28A, CPD, NAPEPLD, MDM4	697	889	18883	1.49325	0.989012	0.236779	0.232515
GOTERM_MF_DIRECT	GO:0042802~identical protein binding	85	11.6758	0.0057337	GLTP, CREBZF, AHCYL1, SERPINA1, HTR2C, PTPRM, AQP4, MSI2, ETS1, ACTB, IGF1R, PTPRG, EPM2AIP1, ALCAM, MCIDAS, RASSF3, RASSF5, DDI2, SACS, GRB10, CASP2, GRID1, COL25A1, CDYL, ZDHHC17, SIRT1, MTSS1, TSN, FOXP1, CLIP1, CREB1, MAF, ALS2, DAAM1, SLC9A6, TRAF3, PEAK1, DMRTA1, MYH9, MAPT, PRKD1, MET, GAS7, DGKH, CREB5, KHDRBS1, CAMK2D, NOTCH1, NUFIP1, MYRF, STK4, RASGRP1, GJC3, ATXN1, KCTD21, BTBD3, MYO6…	697	1734	18883	1.32803	0.991687	0.238809	0.234508
GOTERM_MF_DIRECT	GO:0051015~actin filament binding	17	2.33516	0.00615715	HIP1, TPM3, PPP1R9A, ADD3, CORO2B, LIMD2, ADD2, FMNL3, CLMN, MYO6, ABL1, MYH9, ABL2, FLNB, TLN2, VCL, GAS7	697	215	18883	2.14214	0.99417	0.240331	0.236003
GOTERM_MF_DIRECT	GO:0044325~ion channel binding	13	1.78571	0.00634728	MPP2, CNTNAP2, CAMK2D, YES1, KCNC1, KCNB1, STAC, PDE4D, NEDD4L, ANK2, ANK3, RIMS3, FKBP1B	697	142	18883	2.48024	0.995029	0.240331	0.236003
GOTERM_MF_DIRECT	GO:0001223~transcription coactivator binding	7	0.961538	0.00806795	SMAD4, SMAD3, THRB, GATA6, NFATC1, RORA, TRERF1	697	48	18883	3.95089	0.998827	0.2922	0.286938
GOTERM_MF_DIRECT	GO:0046332~SMAD binding	7	0.961538	0.00891437	PURB, COL3A1, SMAD4, COL1A2, MAGI2, BMPR1A, HIPK2	697	49	18883	3.87026	0.999424	0.295448	0.290127
GOTERM_MF_DIRECT	GO:0004713~protein tyrosine kinase activity	11	1.51099	0.00893014	FER, MAP2K1, EPHA7, YES1, AXL, ABL1, ABL2, MET, FRK, HIPK2, IGF1R	697	113	18883	2.63726	0.999431	0.295448	0.290127
GOTERM_MF_DIRECT	GO:0004674~protein serine/threonine kinase activity	25	3.43407	0.00922165	CAMK2D, STK4, NUAK2, MAPK1, STK38L, MARK4, MAPK4, CDK17, CSNK1G3, MAP2K1, RPS6KL1, CAMK1D, MAP3K1, PRKCE, CASK, ACVR2B, HIPK2, STK24, PRKD3, TAOK1, CAMK4, CDK1, PRKD1, CDK13, BMPR1A	697	387	18883	1.75012	0.999555	0.295448	0.290127
GOTERM_MF_DIRECT	GO:0019902~phosphatase binding	7	0.961538	0.0107945	SPRED1, SMAD3, PPP1R11, DLG3, MAGI2, NFATC2, MAPK1	697	51	18883	3.71849	0.999882	0.333029	0.327032
GOTERM_MF_DIRECT	GO:0043539~protein serine/threonine kinase activator activity	7	0.961538	0.0129392	MAP2K1, DDX3X, ALS2, ACSL1, TAOK1, RICTOR, STK4	697	53	18883	3.57817	0.999981	0.38494	0.378009
GOTERM_MF_DIRECT	GO:0048027~mRNA 5'-UTR binding	5	0.686813	0.0163591	SYNCRIP, DDX3X, LARP1, IGF2BP1, IGF2BP3	697	27	18883	5.017	0.999999	0.460598	0.452304
GOTERM_MF_DIRECT	GO:0003723~RNA binding	71	9.75275	0.0169655	OTUD4, AHCYL1, DDX3X, PPP1R10, CELF2, CCDC47, CELF3, CLTC, MSI2, PHF6, SYNCRIP, PEG10, PAPOLG, GPBP1, RAVER2, HABP4, DDX17, UPF2, ISY1-RAB43, EIF5B, NSUN4, SECISBP2L, FNDC3B, FNDC3A, TSN, PTBP3, DDX19B, MYH9, RBM20, HNRNPH2, MAPT, KHDRBS1, DDX6, RBM47, NUFIP1, BAZ2A, GIGYF2, AKAP1, PURB, GANAB, LARP1, IGF2BP1, FLNB, IGF2BP3, PPARGC1A, PPARGC1B, SRSF11, RANBP2, SPEN, YTHDF2, MYEF2, RBPMS, RCC2, HM…	697	1475	18883	1.30408	0.999999	0.460598	0.452304
GOTERM_MF_DIRECT	GO:0005096~GTPase activator activity	19	2.60989	0.0171411	RANBP2, RGS17, ARHGEF12, ELMOD1, ARHGAP1, ARHGAP26, ARHGAP6, ARHGAP12, ARHGAP21, TBCK, ALS2, CHN2, TAGAP, SGSM2, RGS10, TBC1D14, SRGAP1, GIT1, TBC1D15	697	282	18883	1.82534	0.999999	0.460598	0.452304
GOTERM_MF_DIRECT	GO:0005249~voltage-gated potassium channel activity	7	0.961538	0.0195698	HCN3, KCNC1, KCND2, KCNB1, KCNQ3, KCNA4, KCNQ5	697	58	18883	3.2697	1	0.483457	0.474751
GOTERM_MF_DIRECT	GO:0030374~ligand-dependent nuclear receptor transcription coactivator activity	7	0.961538	0.0195698	HMGA1, NCOA7, ETS1, TRERF1, ATXN7L3, PPARGC1A, PPARGC1B	697	58	18883	3.2697	1	0.483457	0.474751
GOTERM_MF_DIRECT	GO:0003713~transcription coactivator activity	18	2.47253	0.0199048	DDX17, SMARCC1, MYOCD, NOTCH1, MYEF2, CBFB, RBPMS, HMGA1, TRERF1, SIRT1, QKI, HIPK2, PER2, TOX3, ABL1, MTA2, ATXN7L3, PPARGC1A	697	266	18883	1.83328	1	0.483457	0.474751
GOTERM_MF_DIRECT	GO:0016922~ligand-dependent nuclear receptor binding	6	0.824176	0.0203133	SMAD3, BAZ2A, NCOA7, PROX1, SIRT1, PPARGC1A	697	43	18883	3.78025	1	0.483457	0.474751
GOTERM_MF_DIRECT	GO:0003785~actin monomer binding	5	0.686813	0.0208988	COBLL1, PRKCE, ABL1, ABL2, MTSS1	697	29	18883	4.671	1	0.483575	0.474867
GOTERM_MF_DIRECT	GO:0000987~core promoter proximal region sequence-specific DNA binding	7	0.961538	0.0227704	NOTCH1, SMAD3, HMGA1, E2F3, FOXN3, FOXN2, ELL2	697	60	18883	3.16071	1	0.512642	0.503411
GOTERM_MF_DIRECT	GO:0043495~protein anchor	5	0.686813	0.0234302	RRAGC, MYH9, KRAS, PDZK1, ATG2B	697	30	18883	4.5153	1	0.513615	0.504366
GOTERM_MF_DIRECT	GO:0032051~clathrin light chain binding	3	0.412088	0.0251861	HIP1, CLTC, NSG1	697	7	18883	11.6108	1	0.52452	0.515075
GOTERM_MF_DIRECT	GO:0005085~guanyl-nucleotide exchange factor activity	16	2.1978	0.025187	ARHGEF12, DENND5B, RCC2, ARHGEF38, RAP1GDS1, RASGRP1, AKAP13, CYTH2, FGD6, ALS2, TAGAP, PLCE1, PLCG1, RGL2, SOS2, RALGPS2	697	232	18883	1.8684	1	0.52452	0.515075
GOTERM_MF_DIRECT	GO:0004715~non-membrane spanning protein tyrosine kinase activity	6	0.824176	0.0264537	FER, YES1, PEAK1, ABL1, ABL2, FRK	697	46	18883	3.53372	1	0.533941	0.524326
GOTERM_MF_DIRECT	GO:0070628~proteasome binding	4	0.549451	0.0269214	PSME4, SACS, PSMF1, RAD23B	697	18	18883	6.0204	1	0.533941	0.524326
GOTERM_MF_DIRECT	GO:0004725~protein tyrosine phosphatase activity	9	1.23626	0.0297864	PTPRT, MTMR3, EYA3, EYA4, PTPRM, PTPN4, CDC25A, PALD1, PTPRG	697	99	18883	2.46289	1	0.577025	0.566634
GOTERM_MF_DIRECT	GO:0070016~armadillo repeat domain binding	3	0.412088	0.0327715	CTNNBIP1, LEF1, STRN3	697	8	18883	10.1594	1	0.620423	0.609251
GOTERM_MF_DIRECT	GO:0019888~protein phosphatase regulator activity	5	0.686813	0.0387938	PPP1R16B, PPP1R15B, PPP4R2, SHOC2, PPP2R3A	697	35	18883	3.87026	1	0.718116	0.705185
GOTERM_MF_DIRECT	GO:0005516~calmodulin binding	14	1.92308	0.0434747	CAMK2D, CAMK1D, SYT1, CASK, ADD3, CAMSAP2, STRN3, ADD2, EEA1, PPP3CA, CAMK4, MYO6, KCNQ3, MYH9	697	207	18883	1.8323	1	0.771485	0.757593
GOTERM_MF_DIRECT	GO:0017124~SH3 domain binding	10	1.37363	0.0435292	KHDRBS1, FUT8, CNTNAP1, ARHGAP1, ABL1, ADAM10, MAPT, ARHGAP6, SHANK3, QKI	697	126	18883	2.15014	1	0.771485	0.757593
GOTERM_MF_DIRECT	GO:0004879~RNA polymerase II transcription factor activity, ligand-activated sequence-specific DNA binding	6	0.824176	0.0481664	NR4A2, THRB, NR4A3, HNF4A, RORA, RORB	697	54	18883	3.0102	1	0.825007	0.810151
GOTERM_MF_DIRECT	GO:0030957~Tat protein binding	3	0.412088	0.0501703	GABARAPL1, DLL1, ACTB	697	10	18883	8.12755	1	0.825007	0.810151
GOTERM_MF_DIRECT	GO:0001221~transcription cofactor binding	5	0.686813	0.0502144	ZNF618, HMGA1, RORA, KLF4, PBX1	697	38	18883	3.56471	1	0.825007	0.810151
GOTERM_MF_DIRECT	GO:0035091~phosphatidylinositol binding	9	1.23626	0.0505106	HIP1, SNX16, EXOC8, SH3PXD2A, SNX15, SNX12, ESYT3, MAPT, PITPNC1	697	110	18883	2.2166	1	0.825007	0.810151
GOTERM_MF_DIRECT	GO:0060090~binding, bridging	13	1.78571	0.0525267	OTUD4, RBPMS, SGTA, HMGA1, NFATC2, ADAM10, MLLT3, GIGYF2, TAPBP, AKAP13, RRAGC, RICTOR, VCL	697	192	18883	1.83434	1	0.841437	0.826285
GOTERM_MF_DIRECT	GO:0008331~high voltage-gated calcium channel activity	4	0.549451	0.0568052	SCN9A, CACNA1A, CACNA1D, CACNA1E	697	24	18883	4.5153	1	0.844389	0.829184
GOTERM_MF_DIRECT	GO:0048407~platelet-derived growth factor binding	3	0.412088	0.0598546	PDGFRA, COL3A1, COL1A2	697	11	18883	7.38868	1	0.844389	0.829184
GOTERM_MF_DIRECT	GO:0035254~glutamate receptor binding	3	0.412088	0.0598546	HIP1, PLCG1, PTPN4	697	11	18883	7.38868	1	0.844389	0.829184
GOTERM_MF_DIRECT	GO:0003680~AT DNA binding	3	0.412088	0.0598546	MEF2C, HMGA1, MAPT	697	11	18883	7.38868	1	0.844389	0.829184
GOTERM_MF_DIRECT	GO:0008353~RNA polymerase II carboxy-terminal domain kinase activity	3	0.412088	0.0598546	CDK1, MAPK1, CDK13	697	11	18883	7.38868	1	0.844389	0.829184
GOTERM_MF_DIRECT	GO:0019003~GDP binding	7	0.961538	0.0612316	RAB21, RAP1B, NRAS, RRAGC, RRAS, KRAS, RAB9B	697	76	18883	2.4953	1	0.844389	0.829184
GOTERM_MF_DIRECT	GO:0019899~enzyme binding	21	2.88462	0.0618253	CNTNAP2, RBM47, YES1, NOTCH1, THRB, PRKCE, PDE4D, SNX12, HMGA1, ANK2, PHF6, SIRT1, PPP3CA, CREB1, VAPB, TRAF3, CASP2, PLCE1, MDM4, MAPT, IL6R	697	374	18883	1.5212	1	0.844389	0.829184
GOTERM_MF_DIRECT	GO:0070577~lysine-acetylated histone binding	4	0.549451	0.0628477	PSME4, BAZ2A, MLLT3, SIRT1	697	25	18883	4.33469	1	0.844389	0.829184
GOTERM_MF_DIRECT	GO:0008157~protein phosphatase 1 binding	4	0.549451	0.0628477	FER, PPP1R11, PPP1R10, SHOC2	697	25	18883	4.33469	1	0.844389	0.829184
GOTERM_MF_DIRECT	GO:0070412~R-SMAD binding	4	0.549451	0.0628477	PPM1A, MYOCD, SMAD4, SMAD3	697	25	18883	4.33469	1	0.844389	0.829184
GOTERM_MF_DIRECT	GO:0008092~cytoskeletal protein binding	6	0.824176	0.0658401	EPB41L5, FRMD5, EPB41L1, ANK3, LIN7C, PTPN4	697	59	18883	2.7551	1	0.858916	0.843449
GOTERM_MF_DIRECT	GO:0004714~transmembrane receptor protein tyrosine kinase activity	5	0.686813	0.0679936	DDR1, PDGFRA, AXL, MET, IGF1R	697	42	18883	3.22522	1	0.858916	0.843449
GOTERM_MF_DIRECT	GO:0051018~protein kinase A binding	4	0.549451	0.0691743	AKAP13, CRYBG3, MYRIP, WASF1	697	26	18883	4.16797	1	0.858916	0.843449
GOTERM_MF_DIRECT	GO:0030507~spectrin binding	4	0.549451	0.0691743	ANK2, ANK3, ADD2, CAMSAP2	697	26	18883	4.16797	1	0.858916	0.843449
GOTERM_MF_DIRECT	GO:0099508~voltage-gated ion channel activity involved in regulation of presynaptic membrane potential	3	0.412088	0.0701156	KCNC1, KCNA4, KCNQ5	697	12	18883	6.77296	1	0.858916	0.843449
GOTERM_MF_DIRECT	GO:0035497~cAMP response element binding	3	0.412088	0.0701156	CREB1, NR4A3, CREB5	697	12	18883	6.77296	1	0.858916	0.843449
GOTERM_MF_DIRECT	GO:0035259~glucocorticoid receptor binding	3	0.412088	0.0808977	NR4A2, SMAD3, NR4A3	697	13	18883	6.25196	1	0.954701	0.937509
GOTERM_MF_DIRECT	GO:0097157~pre-mRNA intronic binding	3	0.412088	0.0808977	RBPMS, RBM20, TARDBP	697	13	18883	6.25196	1	0.954701	0.937509
GOTERM_MF_DIRECT	GO:0019894~kinesin binding	5	0.686813	0.0831827	KCNC1, AP1G1, DCDC2, DCP1A, ACTB	697	45	18883	3.0102	1	0.954701	0.937509
GOTERM_MF_DIRECT	GO:0045296~cadherin binding	18	2.47253	0.0834667	PTPRT, DDX6, DDX3X, ARHGAP1, PTPRM, ANK3, GIGYF2, PCMT1, PPFIBP1, LARP1, STK24, VAPB, COBLL1, CDH11, MYH9, ITGA6, FLNB, VCL	697	320	18883	1.52391	1	0.954701	0.937509
GOTERM_MF_DIRECT	GO:0019901~protein kinase binding	25	3.43407	0.0842157	CLTC, GATA6, ACTB, STRN3, ADD2, SPRED1, TBC1D14, RICTOR, PLCG1, MAPK4, MAP3K1, SMAD3, RCC2, AP1B1, ADAM10, ANK2, PRLR, CDC25A, FRMD5, NR4A3, CCNE2, TRAF3, DCX, MAPT, CDK13	697	483	18883	1.40227	1	0.954701	0.937509
GOTERM_MF_DIRECT	GO:0030674~protein binding, bridging	9	1.23626	0.0848113	NUFIP1, COL1A2, PPP4R2, ANK2, ANK3, CDYL, PPP2R3A, MAPT, DCAF7	697	123	18883	1.98233	1	0.954701	0.937509
GOTERM_MF_DIRECT	GO:0032266~phosphatidylinositol-3-phosphate binding	5	0.686813	0.0885855	HIP1, SH3PXD2A, SNX12, ZFYVE1, ATG2B	697	46	18883	2.94476	1	0.959499	0.942221
GOTERM_MF_DIRECT	GO:0031490~chromatin DNA binding	7	0.961538	0.0896063	TOX3, NOTCH1, SMAD3, THRB, KLF4, CLOCK, PPARGC1A	697	84	18883	2.25765	1	0.959499	0.942221
GOTERM_MF_DIRECT	GO:0004693~cyclin-dependent protein serine/threonine kinase activity	4	0.549451	0.0897686	CDK17, CDK6, CDK1, CDK13	697	29	18883	3.7368	1	0.959499	0.942221
GOTERM_MF_DIRECT	GO:0003682~chromatin binding	25	3.43407	0.0899786	DLX3, SATB2, LEF1, GATA6, MLLT3, MBTD1, ING5, NSD1, HNF4A, TNRC18, MTA2, SMARCC1, SMAD4, AUTS2, SFMBT1, HMGA1, NFATC2, NAP1L1, CDYL, ASH1L, FOSL2, TOX3, CDK1, ERCC6, ERG	697	487	18883	1.39075	1	0.959499	0.942221
GOTERM_MF_DIRECT	GO:0044548~S100 protein binding	3	0.412088	0.0921488	CACYBP, FGF1, KCNK3	697	14	18883	5.80539	1	0.959499	0.942221
GOTERM_MF_DIRECT	GO:1990247~N6-methyladenosine-containing RNA binding	3	0.412088	0.0921488	YTHDF2, IGF2BP1, IGF2BP3	697	14	18883	5.80539	1	0.959499	0.942221
GOTERM_MF_DIRECT	GO:0008143~poly(A) binding	4	0.549451	0.0971396	KHDRBS1, DDX3X, RBPMS, LARP4	697	30	18883	3.61224	1	0.998979	0.98099

## Sheet: Merged Top 10
Category	GOterm	subgroup	-log10 (p-value)	PValue	Fold Enrichment
GOTERM_BP_DIRECT	Positive regulation of transcription from RNA polymerase II promoter	Biological Process	12.8388	1.44942e-13	2.22663
GOTERM_BP_DIRECT	Regulation of transcription from RNA polymerase II promoter	Biological Process	7.89417	1.27593e-08	1.78342
GOTERM_BP_DIRECT	Positive regulation of transcription, DNA-templated	Biological Process	6.08904	8.14624e-07	2.08417
GOTERM_BP_DIRECT	Protein phosphorylation	Biological Process	4.44389	3.5984e-05	2.30943
GOTERM_BP_DIRECT	Signal transduction	Biological Process	4.0388	9.14541e-05	1.60244
GOTERM_BP_DIRECT	Negative regulation of gene expression	Biological Process	3.88291	0.000130945	2.35288
GOTERM_BP_DIRECT	Regulation of transcription, DNA-templated	Biological Process	3.63145	0.000233641	1.65573
GOTERM_BP_DIRECT	Nervous system development	Biological Process	3.60893	0.000246075	2.07411
GOTERM_BP_DIRECT	Angiogenesis	Biological Process	3.58566	0.000259622	2.46493
GOTERM_BP_DIRECT	Actin cytoskeleton organization	Biological Process	3.56875	0.000269927	2.60227
GOTERM_CC_DIRECT	Cytosol	Cellular Component	10.2877	5.15527e-11	1.41063
GOTERM_CC_DIRECT	Nucleus	Cellular Component	9.96488	1.08422e-10	1.37861
GOTERM_CC_DIRECT	Chromatin	Cellular Component	7.86553	1.36292e-08	1.99676
GOTERM_CC_DIRECT	Nucleoplasm	Cellular Component	6.55091	2.81251e-07	1.40045
GOTERM_CC_DIRECT	Cytoplasmic stress granule	Cellular Component	5.92468	1.18938e-06	4.75408
GOTERM_CC_DIRECT	Golgi apparatus	Cellular Component	5.06403	8.62924e-06	1.76352
GOTERM_CC_DIRECT	Cytoplasm	Cellular Component	4.87743	1.32608e-05	1.26312
GOTERM_CC_DIRECT	Glutamatergic synapse	Cellular Component	4.6474	2.25215e-05	2.29184
GOTERM_CC_DIRECT	Adherens junction	Cellular Component	4.6114	2.44681e-05	3.11585
GOTERM_CC_DIRECT	Dendrite	Cellular Component	4.50859	3.10033e-05	2.22208
GOTERM_MF_DIRECT	Protein binding	Molecular Function	15.2868	5.16678e-16	1.20034
GOTERM_MF_DIRECT	Transcription factor activity, sequence-specific DNA binding	Molecular Function	9.97989	1.04739e-10	2.58017
GOTERM_MF_DIRECT	DNA binding	Molecular Function	6.68042	2.08726e-07	1.76599
GOTERM_MF_DIRECT	RNA polymerase II transcription factor activity, sequence-specific DNA binding	Molecular Function	5.97909	1.04933e-06	1.74856
GOTERM_MF_DIRECT	RNA polymerase II core promoter proximal region sequence-specific DNA binding	Molecular Function	5.71974	1.90662e-06	1.75981
GOTERM_MF_DIRECT	Sequence-specific double-stranded DNA binding	Molecular Function	5.70404	1.97678e-06	2.18092
GOTERM_MF_DIRECT	Sequence-specific DNA binding	Molecular Function	5.60786	2.46686e-06	2.59562
GOTERM_MF_DIRECT	Transcriptional activator activity, RNA polymerase II transcription regulatory region sequence-specific binding	Molecular Function	5.1809	6.59324e-06	2.19812
GOTERM_MF_DIRECT	mRNA binding	Molecular Function	4.86367	1.36877e-05	2.76447
GOTERM_MF_DIRECT	Beta-catenin binding	Molecular Function	3.94837	0.000112624	3.91326
