# Supplementary material for: RNA sequencing-based profiling of differentially expressed microRNAs in endothelial cells from offspring of hypertensive pregnancies: a preliminary study
Source: Front Mol Biosci. 2025 Jul 21;12:1520101. doi: 10.3389/fmolb.2025.1520101 (PMC12391922; doi:10.3389/fmolb.2025.1520101)
Supplement: Supplementary file 4 [file DataSheet5.xlsx]

## Sheet: CytoHubba Degree Top 20 Nodes
node_name	Gene Name	MCC	DMNC	MNC	Degree	EPC	BottleNeck	EcCentricity	Closeness	Radiality	Betweenness	Stress	ClusteringCoefficient
9606.ENSP00000494750	ACTB	290839	0.19957	97	98	95.71	139	0.17288	326.117	7.58599	75464.9	537566	0.10015
9606.ENSP00000256078	KRAS	273918	0.22846	77	79	92.944	18	0.17288	305.35	7.44742	38653.8	300116	0.11944
9606.ENSP00000387699	CREB1	255925	0.27576	54	55	87.876	24	0.14406	285.417	7.34177	21554	177840	0.16364
9606.ENSP00000498587	NOTCH1	280185	0.35018	51	52	89.618	21	0.14406	282.533	7.31982	12205.7	121648	0.21116
9606.ENSP00000341551	SMAD4	236434	0.28327	50	50	83.943	10	0.14406	276.367	7.25808	13022.5	127922	0.17878
9606.ENSP00000358548	NRAS	56452	0.27174	48	48	83.797	47	0.14406	281.333	7.32531	11914.3	112654	0.17376
9606.ENSP00000332973	SMAD3	213707	0.33756	44	47	85.717	10	0.14406	276.767	7.28552	12955.7	113052	0.19426
9606.ENSP00000215832	MAPK1	80284	0.32309	44	44	89.396	12	0.14406	282.95	7.35412	13432.7	127454	0.21247
9606.ENSP00000244007	PLCG1	9127	0.29007	39	42	79.892	3	0.14406	273.617	7.27043	9453.82	82594	0.17189
9606.ENSP00000361423	ABL1	46822	0.36289	35	39	81.074	8	0.14406	269.767	7.23475	11449.2	98058	0.20648
9606.ENSP00000265734	CDK6	14251	0.34392	35	38	77.062	14	0.14406	266.783	7.21692	8586.88	78404	0.20626
9606.ENSP00000211998	MAP2K1	6987	0.34286	29	36	71.077	21	0.14406	265.467	7.21692	13105.8	104120	0.16825
9606.ENSP00000302486	VCL	101943	0.35388	33	36	78.039	6	0.14406	266.617	7.21966	8610.28	75098	0.21429
9606.ENSP00000280772	ANK3	706	0.22097	32	35	63.388	17	0.14406	262.2	7.18536	12631.4	117420	0.13782
9606.ENSP00000378699	CDK1	25583	0.36571	29	34	75.816	20	0.14406	264.3	7.19771	8666.11	72174	0.19964
9606.ENSP00000231487	BTRC	4371	0.26214	33	34	73.209	19	0.17288	266.933	7.24299	9311.29	78980	0.17825
9606.ENSP00000359206	SKP1	3307	0.25469	29	34	67.274	8	0.14406	258.25	7.14831	10835.3	84978	0.13904
9606.ENSP00000312987	SIRT1	116646	0.37024	31	33	75.904	20	0.14406	261.75	7.18124	9982.53	77922	0.24053
9606.ENSP00000349588	HNF4A	921	0.23202	32	33	66.41	5	0.14406	267.733	7.24985	14316.3	142990	0.15909
9606.ENSP00000212015	ANK2	137599	0.37914	30	33	75.635	5	0.14406	266.367	7.22927	10562	82332	0.23295
