# Supplementary material for: RNA sequencing-based profiling of differentially expressed microRNAs in endothelial cells from offspring of hypertensive pregnancies: a preliminary study
Source: Front Mol Biosci. 2025 Jul 21;12:1520101. doi: 10.3389/fmolb.2025.1520101 (PMC12391922; doi:10.3389/fmolb.2025.1520101)
Supplement: Supplementary file 5 [file DataSheet1.xlsx]

## Sheet: PIHvsNH.DE_up
sRNA	PIH_readcount	NH_readcount	log2FoldChange	pval	padj
hsa-miR-196a-5p	1075.68	1.4777	9.6017	1.64e-09	9.1e-07
hsa-miR-199b-5p	1489.2	25.2366	5.8767	1.77e-07	4.9e-05
hsa-miR-675-3p	247.277	0	23.205	1.24e-06	0.00022857
hsa-miR-708-5p	212.571	1.4777	7.2509	3.25e-05	0.0045071
hsa-miR-34c-5p	1237.6	45.599	4.7556	5.09e-05	0.0056342
hsa-miR-143-3p	62018.9	5402.32	3.5212	0.00012922	0.011931
hsa-miR-145-3p	189.064	8.38648	4.5125	0.00026234	0.018167
hsa-miR-145-5p	1440.78	92.1934	3.9692	0.00025665	0.018167
