# Supplementary material for: RNA sequencing-based profiling of differentially expressed microRNAs in endothelial cells from offspring of hypertensive pregnancies: a preliminary study
Source: Front Mol Biosci. 2025 Jul 21;12:1520101. doi: 10.3389/fmolb.2025.1520101 (PMC12391922; doi:10.3389/fmolb.2025.1520101)
Supplement: Supplementary file 6 [file DataSheet2.xlsx]

## Sheet: miRNAs Targeted Genes
miRNA	Gene name
hsa-miR-196a-5p	HOXA7
hsa-miR-196a-5p	HOXC8
hsa-miR-196a-5p	SLC9A6
hsa-miR-196a-5p	EXOC8
hsa-miR-196a-5p	GATA6
hsa-miR-196a-5p	PBX1
hsa-miR-196a-5p	LRIG2
hsa-miR-196a-5p	CCNJ
hsa-miR-196a-5p	CBFA2T3
hsa-miR-196a-5p	LRP1B
hsa-miR-196a-5p	GAN
hsa-miR-196a-5p	SNX16
hsa-miR-196a-5p	AQP4
hsa-miR-196a-5p	PTPRG
hsa-miR-196a-5p	IGF2BP3
hsa-miR-196a-5p	IGF2BP1
hsa-miR-196a-5p	GALC
hsa-miR-196a-5p	RCC2
hsa-miR-196a-5p	SFMBT1
hsa-miR-196a-5p	NRAS
hsa-miR-196a-5p	NAP1L1
hsa-miR-196a-5p	DCDC2
hsa-miR-196a-5p	PPP1R15B
hsa-miR-196a-5p	GTF2A1
hsa-miR-196a-5p	NXPE3
hsa-miR-196a-5p	CCDC47
hsa-miR-196a-5p	DIP2A
hsa-miR-196a-5p	CASK
hsa-miR-196a-5p	PACRGL
hsa-miR-196a-5p	TRERF1
hsa-miR-196a-5p	FRMD4B
hsa-miR-196a-5p	RASGRP1
hsa-miR-196a-5p	CEP350
hsa-miR-196a-5p	EPHA7
hsa-miR-196a-5p	ABL1
hsa-miR-196a-5p	PHF20
hsa-miR-196a-5p	RASSF3
hsa-miR-196a-5p	CREBL2
hsa-miR-196a-5p	HIP1
hsa-miR-196a-5p	PSMD11
hsa-miR-196a-5p	COL1A2
hsa-miR-196a-5p	ING5
hsa-miR-196a-5p	PAPOLG
hsa-miR-196a-5p	ERG
hsa-miR-196a-5p	ELF4
hsa-miR-196a-5p	HP1BP3
hsa-miR-196a-5p	RGL2
hsa-miR-196a-5p	TSPAN12
hsa-miR-196a-5p	MGAT4A
hsa-miR-196a-5p	ATP8B4
hsa-miR-196a-5p	DDX19B
hsa-miR-196a-5p	HDX
hsa-miR-196a-5p	PRICKLE1
hsa-miR-196a-5p	CDYL
hsa-miR-196a-5p	RAVER2
hsa-miR-196a-5p	COL3A1
hsa-miR-196a-5p	RICTOR
hsa-miR-196a-5p	SPRED1
hsa-miR-196a-5p	CPD
hsa-miR-196a-5p	TOX3
hsa-miR-196a-5p	NRXN1
hsa-miR-196a-5p	EEA1
hsa-miR-196a-5p	GAS7
hsa-miR-196a-5p	LIN28B
hsa-miR-196a-5p	SMARCC1
hsa-miR-196a-5p	HMGA1
hsa-miR-196a-5p	PRLR
hsa-miR-196a-5p	LIN28A
hsa-miR-196a-5p	ZDHHC21
hsa-miR-196a-5p	BACH1
hsa-miR-196a-5p	MARS2
hsa-miR-196a-5p	TMEM143
hsa-miR-196a-5p	PANK2
hsa-miR-196a-5p	ZNF507
hsa-miR-196a-5p	SOX11
hsa-miR-196a-5p	MRS2
hsa-miR-196a-5p	OPCML
hsa-miR-196a-5p	LRRTM3
hsa-miR-196a-5p	KCNQ5
hsa-miR-196a-5p	SYNCRIP
hsa-miR-196a-5p	ZNF710
hsa-miR-196a-5p	NEDD4L
hsa-miR-196a-5p	HABP4
hsa-miR-196a-5p	KLHL23
hsa-miR-196a-5p	YOD1
hsa-miR-196a-5p	PALD1
hsa-miR-196a-5p	CPEB3
hsa-miR-196a-5p	CPM
hsa-miR-196a-5p	GLTP
hsa-miR-196a-5p	TMX1
hsa-miR-196a-5p	BCAT1
hsa-miR-196a-5p	LARP4
hsa-miR-196a-5p	SORCS1
hsa-miR-196a-5p	CCM2L
hsa-miR-196a-5p	ARHGEF38
hsa-miR-196a-5p	KCTD21
hsa-miR-199b-5p	DDR1
hsa-miR-199b-5p	MYRF
hsa-miR-199b-5p	CLCN3
hsa-miR-199b-5p	SLC24A3
hsa-miR-199b-5p	CELSR1
hsa-miR-199b-5p	LIN7C
hsa-miR-199b-5p	HAPLN1
hsa-miR-199b-5p	FZD4
hsa-miR-199b-5p	RAD23B
hsa-miR-199b-5p	GCNT2
hsa-miR-199b-5p	SULF1
hsa-miR-199b-5p	AKAP1
hsa-miR-199b-5p	ARHGAP12
hsa-miR-199b-5p	GPR63
hsa-miR-199b-5p	RASSF2
hsa-miR-199b-5p	ZNF439
hsa-miR-199b-5p	ZNF544
hsa-miR-199b-5p	ARHGAP21
hsa-miR-199b-5p	ZNF704
hsa-miR-199b-5p	RBM47
hsa-miR-199b-5p	ECE1
hsa-miR-199b-5p	SIRT1
hsa-miR-199b-5p	NSG1
hsa-miR-199b-5p	CLIP1
hsa-miR-199b-5p	ACVR2B
hsa-miR-199b-5p	HMCN1
hsa-miR-199b-5p	FER
hsa-miR-199b-5p	SHOC2
hsa-miR-199b-5p	CCNL1
hsa-miR-199b-5p	KPNA4
hsa-miR-199b-5p	SOS2
hsa-miR-199b-5p	AUTS2
hsa-miR-199b-5p	PLXNA2
hsa-miR-199b-5p	PPARGC1A
hsa-miR-199b-5p	SORCS3
hsa-miR-199b-5p	BTRC
hsa-miR-199b-5p	NINL
hsa-miR-199b-5p	ABHD17C
hsa-miR-199b-5p	ZNF776
hsa-miR-199b-5p	SACS
hsa-miR-199b-5p	ZNF584
hsa-miR-199b-5p	BICC1
hsa-miR-199b-5p	ATXN7
hsa-miR-199b-5p	HSPA12A
hsa-miR-199b-5p	AP1G1
hsa-miR-199b-5p	IPO8
hsa-miR-199b-5p	FAM126B
hsa-miR-199b-5p	ZNF329
hsa-miR-199b-5p	RFX3
hsa-miR-199b-5p	USP31
hsa-miR-199b-5p	NTNG1
hsa-miR-199b-5p	CELF2
hsa-miR-199b-5p	EIF5B
hsa-miR-199b-5p	PPFIBP1
hsa-miR-199b-5p	RNF38
hsa-miR-199b-5p	BEND3
hsa-miR-199b-5p	MGAT3
hsa-miR-199b-5p	CRYBG3
hsa-miR-199b-5p	RNF11
hsa-miR-199b-5p	ETS1
hsa-miR-199b-5p	GIT1
hsa-miR-199b-5p	ZNF579
hsa-miR-199b-5p	CCDC43
hsa-miR-199b-5p	RBPMS
hsa-miR-199b-5p	PDE4D
hsa-miR-199b-5p	TST
hsa-miR-199b-5p	AFTPH
hsa-miR-199b-5p	YIPF6
hsa-miR-199b-5p	TAOK1
hsa-miR-199b-5p	PODXL
hsa-miR-199b-5p	MYEF2
hsa-miR-199b-5p	CLOCK
hsa-miR-199b-5p	ALS2
hsa-miR-199b-5p	ZFP2
hsa-miR-199b-5p	RRP15
hsa-miR-199b-5p	DPP8
hsa-miR-199b-5p	ZNF652
hsa-miR-199b-5p	PPP1R9A
hsa-miR-199b-5p	SUCO
hsa-miR-199b-5p	RANBP2
hsa-miR-199b-5p	SLC24A2
hsa-miR-199b-5p	ZNF547
hsa-miR-199b-5p	AGO1
hsa-miR-199b-5p	RAB9B
hsa-miR-199b-5p	EPHA7
hsa-miR-199b-5p	STON2
hsa-miR-199b-5p	RLIM
hsa-miR-199b-5p	APPBP2
hsa-miR-199b-5p	WDR44
hsa-miR-199b-5p	EPB41L1
hsa-miR-199b-5p	SORL1
hsa-miR-199b-5p	TRAF3
hsa-miR-199b-5p	LARP4
hsa-miR-199b-5p	CEP85L
hsa-miR-199b-5p	RGS10
hsa-miR-199b-5p	STK4
hsa-miR-199b-5p	ZDHHC21
hsa-miR-199b-5p	CAPRIN1
hsa-miR-199b-5p	MN1
hsa-miR-199b-5p	RORB
hsa-miR-199b-5p	PCYOX1
hsa-miR-199b-5p	RAB21
hsa-miR-199b-5p	GJA5
hsa-miR-199b-5p	MCFD2
hsa-miR-199b-5p	MARK4
hsa-miR-199b-5p	MRPS25
hsa-miR-199b-5p	CLTC
hsa-miR-199b-5p	TENM4
hsa-miR-199b-5p	PPP6C
hsa-miR-199b-5p	ABCC1
hsa-miR-199b-5p	NFE2L1
hsa-miR-199b-5p	MATN2
hsa-miR-199b-5p	ZNF148
hsa-miR-199b-5p	GANAB
hsa-miR-199b-5p	BTBD3
hsa-miR-199b-5p	DDX3X
hsa-miR-675-3p	ATXN1
hsa-miR-675-3p	AGPS
hsa-miR-675-3p	ADAM22
hsa-miR-675-3p	CHN2
hsa-miR-675-3p	CSMD3
hsa-miR-675-3p	KCNA4
hsa-miR-675-3p	CDH11
hsa-miR-675-3p	NAIP
hsa-miR-675-3p	SLC25A31
hsa-miR-675-3p	NR4A3
hsa-miR-675-3p	TRIM9
hsa-miR-675-3p	FNBP4
hsa-miR-675-3p	SLC5A12
hsa-miR-675-3p	LAMB4
hsa-miR-675-3p	ORC4
hsa-miR-675-3p	SCRN1
hsa-miR-675-3p	SIX4
hsa-miR-675-3p	ZNF268
hsa-miR-675-3p	RSPO1
hsa-miR-675-3p	TBL1XR1
hsa-miR-675-3p	ASH1L
hsa-miR-675-3p	CDK13
hsa-miR-675-3p	EYA4
hsa-miR-675-3p	IGF1R
hsa-miR-675-3p	ELF1
hsa-miR-675-3p	ZNF627
hsa-miR-675-3p	SCN9A
hsa-miR-675-3p	ZFP1
hsa-miR-675-3p	ILDR2
hsa-miR-675-3p	PYGO1
hsa-miR-675-3p	SLC44A1
hsa-miR-675-3p	DDI2
hsa-miR-675-3p	CNOT6L
hsa-miR-675-3p	GJC3
hsa-miR-675-3p	COBLL1
hsa-miR-675-3p	PDE10A
hsa-miR-675-3p	PLP1
hsa-miR-675-3p	TRAF3IP1
hsa-miR-675-3p	MEF2C
hsa-miR-675-3p	ZNF704
hsa-miR-675-3p	PAPSS2
hsa-miR-675-3p	ARHGEF12
hsa-miR-675-3p	FNDC3A
hsa-miR-675-3p	DMRTA1
hsa-miR-675-3p	CACYBP
hsa-miR-675-3p	TFEC
hsa-miR-675-3p	STS
hsa-miR-675-3p	TMEM123
hsa-miR-675-3p	NUFIP1
hsa-miR-675-3p	TSHZ2
hsa-miR-675-3p	SLC17A8
hsa-miR-675-3p	YTHDF2
hsa-miR-708-5p	TNS3
hsa-miR-708-5p	FOXJ3
hsa-miR-708-5p	BCAM
hsa-miR-708-5p	RPRD1A
hsa-miR-708-5p	CNTFR
hsa-miR-708-5p	ZKSCAN8
hsa-miR-708-5p	GPM6A
hsa-miR-708-5p	ARIH1
hsa-miR-708-5p	GON4L
hsa-miR-708-5p	WSB2
hsa-miR-708-5p	TEF
hsa-miR-708-5p	MTSS1
hsa-miR-708-5p	RAP1B
hsa-miR-708-5p	AS3MT
hsa-miR-708-5p	FAM217B
hsa-miR-708-5p	SPRY3
hsa-miR-708-5p	RHO
hsa-miR-708-5p	RCVRN
hsa-miR-708-5p	CASP2
hsa-miR-708-5p	FMNL3
hsa-miR-708-5p	RBBP5
hsa-miR-708-5p	CYTH2
hsa-miR-708-5p	TXNL1
hsa-miR-708-5p	TAGAP
hsa-miR-708-5p	TMEM200B
hsa-miR-708-5p	PSMF1
hsa-miR-708-5p	MTMR3
hsa-miR-708-5p	NNAT
hsa-miR-708-5p	GLP2R
hsa-miR-708-5p	DCAF10
hsa-miR-708-5p	TLN2
hsa-miR-708-5p	STK24
hsa-miR-708-5p	CCDC113
hsa-miR-708-5p	AMIGO1
hsa-miR-708-5p	ALG9
hsa-miR-708-5p	RNF150
hsa-miR-708-5p	EYA3
hsa-mIr-34c-5p	HCN3
hsa-mIr-34c-5p	FAM76A
hsa-mIr-34c-5p	MDM4
hsa-mIr-34c-5p	DLL1
hsa-mIr-34c-5p	FKBP1B
hsa-mIr-34c-5p	SYT1
hsa-mIr-34c-5p	E2F5
hsa-mIr-34c-5p	PPP1R11
hsa-mIr-34c-5p	RAP1GDS1
hsa-mIr-34c-5p	FAM167A
hsa-mIr-34c-5p	SDK2
hsa-mIr-34c-5p	SATB2
hsa-mIr-34c-5p	SCN2B
hsa-mIr-34c-5p	MYCN
hsa-mIr-34c-5p	CELF3
hsa-mIr-34c-5p	MGAT4A
hsa-mIr-34c-5p	NAV3
hsa-mIr-34c-5p	NAV1
hsa-mIr-34c-5p	MET
hsa-mIr-34c-5p	FLOT2
hsa-mIr-34c-5p	XYLT1
hsa-mIr-34c-5p	AHCYL2
hsa-mIr-34c-5p	TGIF2
hsa-mIr-34c-5p	CACNA1E
hsa-mIr-34c-5p	MLLT3
hsa-mIr-34c-5p	FUT9
hsa-mIr-34c-5p	RRAS
hsa-mIr-34c-5p	PITPNC1
hsa-mIr-34c-5p	MPP2
hsa-mIr-34c-5p	SLC25A27
hsa-mIr-34c-5p	FOXP1
hsa-mIr-34c-5p	ELMOD1
hsa-mIr-34c-5p	FUT8
hsa-mIr-34c-5p	LEF1
hsa-mIr-34c-5p	SHANK3
hsa-mIr-34c-5p	KIAA1217
hsa-mIr-34c-5p	DAAM1
hsa-mIr-34c-5p	ASIC2
hsa-mIr-34c-5p	NUMBL
hsa-mIr-34c-5p	TBL1XR1
hsa-mIr-34c-5p	GABRA3
hsa-mIr-34c-5p	TNRC18
hsa-mIr-34c-5p	UBP1
hsa-mIr-34c-5p	PPARGC1B
hsa-mIr-34c-5p	CUEDC1
hsa-mIr-34c-5p	ZMYM4
hsa-mIr-34c-5p	ARID4B
hsa-mIr-34c-5p	HNF4A
hsa-mIr-34c-5p	CDK6
hsa-mIr-34c-5p	NRN1
hsa-mIr-34c-5p	EML5
hsa-mIr-34c-5p	FOXN2
hsa-mIr-34c-5p	FGD6
hsa-mIr-34c-5p	PDE7B
hsa-mIr-34c-5p	ADO
hsa-mIr-34c-5p	ANK3
hsa-mIr-34c-5p	LMAN1
hsa-mIr-34c-5p	POGZ
hsa-mIr-34c-5p	SLC4A7
hsa-mIr-34c-5p	RPS6KL1
hsa-mIr-34c-5p	SERPINF2
hsa-mIr-34c-5p	STRN3
hsa-mIr-34c-5p	PPP2R3A
hsa-mIr-34c-5p	AMER1
hsa-mIr-34c-5p	FOXJ2
hsa-mIr-34c-5p	PPFIA1
hsa-mIr-34c-5p	SMIM15
hsa-mIr-34c-5p	BCL2L13
hsa-mIr-34c-5p	CERS6
hsa-mIr-34c-5p	PURB
hsa-mIr-34c-5p	NRIP3
hsa-mIr-34c-5p	ZNF304
hsa-mIr-34c-5p	STK38L
hsa-mIr-34c-5p	GOLPH3L
hsa-mIr-34c-5p	WASF1
hsa-mIr-34c-5p	RRAGC
hsa-mIr-34c-5p	IL6R
hsa-mIr-34c-5p	GLCE
hsa-mIr-34c-5p	ZDHHC17
hsa-mIr-34c-5p	ADAM22
hsa-mIr-34c-5p	DCAF7
hsa-mIr-34c-5p	NOS1AP
hsa-mIr-34c-5p	ADD2
hsa-mIr-34c-5p	RFX3
hsa-mIr-34c-5p	ANKRD52
hsa-mIr-34c-5p	ACBD3
hsa-mIr-34c-5p	CLOCK
hsa-mIr-34c-5p	ZNF281
hsa-mIr-34c-5p	BNC2
hsa-mIr-34c-5p	HTR2C
hsa-mIr-34c-5p	PLAG1
hsa-mIr-34c-5p	ZNF644
hsa-mIr-34c-5p	ZFHX4
hsa-mIr-34c-5p	BRINP1
hsa-mIr-34c-5p	SGPP1
hsa-mIr-34c-5p	PDGFRA
hsa-mIr-34c-5p	CBFA2T3
hsa-mIr-34c-5p	DPYSL4
hsa-mIr-34c-5p	TMEM164
hsa-mIr-34c-5p	PPP1R16B
hsa-mIr-34c-5p	ACSL4
hsa-mIr-34c-5p	TSN
hsa-mIr-34c-5p	CLCN3
hsa-mIr-34c-5p	DIXDC1
hsa-mIr-34c-5p	BRPF3
hsa-mIr-34c-5p	OSGIN2
hsa-mIr-34c-5p	ANK2
hsa-mIr-34c-5p	INA
hsa-mIr-34c-5p	C14orf28
hsa-mIr-34c-5p	DGKZ
hsa-mIr-34c-5p	ARHGAP1
hsa-mIr-34c-5p	MCIDAS
hsa-mIr-34c-5p	E2F3
hsa-mIr-34c-5p	KLF4
hsa-mIr-34c-5p	CCNE2
hsa-mIr-34c-5p	TMEM109
hsa-mIr-34c-5p	AXL
hsa-mIr-34c-5p	DNAJC16
hsa-mIr-34c-5p	TPD52
hsa-mIr-34c-5p	MYH9
hsa-mIr-34c-5p	SNX15
hsa-mIr-34c-5p	TRIM67
hsa-mIr-34c-5p	VCL
hsa-mIr-34c-5p	PGM1
hsa-mIr-34c-5p	ASB1
hsa-mIr-34c-5p	ZDHHC16
hsa-mIr-34c-5p	UHRF2
hsa-mIr-34c-5p	PLEKHH2
hsa-mIr-34c-5p	ACSL1
hsa-mIr-34c-5p	AGO4
hsa-mIr-34c-5p	RGS17
hsa-mIr-34c-5p	MAP2K1
hsa-mIr-34c-5p	NOTCH1
hsa-mIr-34c-5p	TRANK1
hsa-mIr-34c-5p	SURF4
hsa-mIr-34c-5p	KCNK3
hsa-mIr-34c-5p	PPP1R10
hsa-mIr-34c-5p	PPM1A
hsa-mIr-34c-5p	METAP1
hsa-mIr-34c-5p	PEG10
hsa-mIr-34c-5p	CDC25A
hsa-mIr-34c-5p	ESYT3
hsa-mIr-34c-5p	PRKD1
hsa-mIr-34c-5p	VWA5B2
hsa-mIr-34c-5p	NSD1
hsa-mIr-34c-5p	USP31
hsa-mIr-34c-5p	MMAB
hsa-mIr-34c-5p	BAZ2A
hsa-mIr-34c-5p	CAPN6
hsa-mIr-34c-5p	CTDSP2
hsa-mIr-34c-5p	ELL2
hsa-mIr-34c-5p	BTBD11
hsa-mIr-34c-5p	DDX17
hsa-mIr-34c-5p	THSD4
hsa-mIr-34c-5p	SGTA
hsa-mIr-34c-5p	CAMK4
hsa-mIr-34c-5p	ADAM10
hsa-mIr-34c-5p	PROX1
hsa-mIr-34c-5p	ZNF282
hsa-mIr-34c-5p	NR4A2
hsa-mIr-34c-5p	MYRIP
hsa-mIr-34c-5p	PTPN4
hsa-mIr-34c-5p	TBCK
hsa-mIr-34c-5p	SVOP
hsa-mIr-34c-5p	SNX12
hsa-mIr-34c-5p	ATG4B
hsa-mIr-34c-5p	DGKH
hsa-mIr-34c-5p	PEAK1
hsa-mIr-34c-5p	SGSM2
hsa-mIr-34c-5p	SIDT1
hsa-mIr-34c-5p	NDST1
hsa-mIr-34c-5p	ALCAM
hsa-mIr-34c-5p	FAT4
hsa-mIr-34c-5p	DCX
hsa-mIr-34c-5p	LIMD2
hsa-mIr-34c-5p	GAS1
hsa-mIr-34c-5p	TNRC6B
hsa-mIr-34c-5p	LRRC40
hsa-mIr-34c-5p	CD47
hsa-mIr-34c-5p	CNTN2
hsa-mIr-34c-5p	AMER2
hsa-mIr-34c-5p	VAT1
hsa-mIr-34c-5p	DMWD
hsa-mIr-34c-5p	WSCD2
hsa-mIr-34c-5p	FOXN3
hsa-mIr-34c-5p	TMCC3
hsa-mIr-34c-5p	SAMD12
hsa-mIr-34c-5p	LZTS3
hsa-mIr-34c-5p	CASP2
hsa-mIr-34c-5p	SMAD4
hsa-mIr-34c-5p	RIMS3
hsa-mIr-34c-5p	RALGPS2
hsa-mIr-34c-5p	FRK
hsa-mIr-34c-5p	C3orf70
hsa-mIr-34c-5p	RAB43
hsa-mIr-34c-5p	ACVR2B
hsa-mIr-34c-5p	ISY1-RAB43
hsa-mIr-34c-5p	NAPEPLD
hsa-mIr-34c-5p	CNTNAP2
hsa-mIr-34c-5p	PER2
hsa-mIr-34c-5p	PTPRM
hsa-mIr-34c-5p	PEX5L
hsa-mIr-34c-5p	VPS4A
hsa-mIr-34c-5p	UBN2
hsa-mIr-34c-5p	AFF4
hsa-mIr-34c-5p	POU2F1
hsa-mIr-34c-5p	MAPT
hsa-mIr-34c-5p	GRM7
hsa-mIr-34c-5p	RORA
hsa-mIr-34c-5p	KIAA1210
hsa-mIr-34c-5p	CCDC85A
hsa-mIr-34c-5p	CNTNAP1
hsa-mIr-34c-5p	CNOT6L
hsa-mIr-34c-5p	RANBP10
hsa-mIr-34c-5p	CHMP7
hsa-mIr-34c-5p	FNDC3B
hsa-mIr-34c-5p	TTC19
hsa-mIr-34c-5p	CR2
hsa-mIr-34c-5p	MYOCD
hsa-mIr-34c-5p	CALCR
hsa-mIr-34c-5p	FAM126B
hsa-mIr-34c-5p	COL12A1
hsa-mIr-34c-5p	ZBTB46
hsa-mIr-34c-5p	ATXN7L3
hsa-mIr-34c-5p	PLCG1
hsa-mIr-34c-5p	AP1B1
hsa-mIr-34c-5p	GPR85
hsa-mIr-34c-5p	MTMR9
hsa-mIr-34c-5p	FAT3
hsa-mIr-34c-5p	CRTC1
hsa-mIr-34c-5p	KCNQ3
hsa-mIr-34c-5p	SPRY3
hsa-mIr-34c-5p	RNF213
hsa-mIr-34c-5p	SLCO3A1
hsa-mIr-34c-5p	SATB1
hsa-mIr-34c-5p	DCP1A
hsa-mIr-34c-5p	MTA2
hsa-mIr-34c-5p	IGSF1
hsa-mIr-34c-5p	RSPO4
hsa-mIr-34c-5p	GRID1
hsa-mIr-34c-5p	PPP4R2
hsa-mIr-34c-5p	SPEN
hsa-miR-143-3p	VASH1
hsa-miR-143-3p	ABL2
hsa-miR-143-3p	MSI2
hsa-miR-143-3p	EPM2AIP1
hsa-miR-143-3p	GXYLT1
hsa-miR-143-3p	ITM2B
hsa-miR-143-3p	MYO6
hsa-miR-143-3p	ZBTB44
hsa-miR-143-3p	AKAP13
hsa-miR-143-3p	PSME4
hsa-miR-143-3p	AHCYL1
hsa-miR-143-3p	HIPK2
hsa-miR-143-3p	KRAS
hsa-miR-143-3p	CRELD1
hsa-miR-143-3p	DIP2B
hsa-miR-143-3p	ATP10A
hsa-miR-143-3p	MOGS
hsa-miR-143-3p	ARHGAP26
hsa-miR-143-3p	TRAPPC8
hsa-miR-143-3p	SRSF11
hsa-miR-143-3p	PC
hsa-miR-143-3p	VAPB
hsa-miR-143-3p	TET1
hsa-miR-143-3p	PHF6
hsa-miR-143-3p	ADD3
hsa-miR-143-3p	FRS2
hsa-miR-143-3p	ITGB8
hsa-miR-143-3p	NPR3
hsa-miR-143-3p	FNDC5
hsa-miR-143-3p	THRB
hsa-miR-143-3p	ATP6V1A
hsa-miR-143-3p	KIF3B
hsa-miR-143-3p	GIGYF2
hsa-miR-143-3p	UBXN2B
hsa-miR-143-3p	SECISBP2L
hsa-miR-143-3p	ABHD17B
hsa-miR-143-3p	ST8SIA4
hsa-miR-143-3p	STOX2
hsa-miR-143-3p	CACNA1A
hsa-miR-143-3p	MAB21L1
hsa-miR-143-3p	TM2D2
hsa-miR-143-3p	FAM117A
hsa-miR-143-3p	FADS6
hsa-miR-143-3p	CPD
hsa-miR-143-3p	LMO4
hsa-miR-143-3p	FGF1
hsa-miR-143-3p	FOSL2
hsa-miR-143-3p	NFATC1
hsa-miR-143-3p	INO80D
hsa-miR-143-3p	SLC30A8
hsa-miR-143-3p	ZNF583
hsa-miR-143-3p	CBFB
hsa-miR-143-3p	COL25A1
hsa-miR-143-3p	NUAK2
hsa-miR-143-3p	SH3PXD2A
hsa-miR-143-3p	UBE2E3
hsa-miR-143-3p	AFF1
hsa-miR-143-3p	PDIA6
hsa-miR-143-3p	STAC
hsa-miR-143-3p	SLC25A15
hsa-miR-143-3p	SCAMP4
hsa-miR-143-3p	SLC4A8
hsa-miR-143-3p	FAR1
hsa-miR-143-3p	KRT80
hsa-miR-143-3p	KCNK10
hsa-miR-143-3p	SOBP
hsa-miR-143-3p	SLC7A11
hsa-miR-143-3p	FRMD5
hsa-miR-143-3p	RICTOR
hsa-miR-143-3p	ITGA6
hsa-miR-143-3p	DCAKD
hsa-miR-143-3p	CRLF3
hsa-miR-143-3p	LARP4
hsa-miR-143-3p	PRKCE
hsa-miR-143-3p	A1CF
hsa-miR-143-3p	TARDBP
hsa-miR-143-3p	NOVA2
hsa-miR-143-3p	ATG2B
hsa-miR-143-3p	SIDT1
hsa-miR-143-3p	KCNB1
hsa-miR-143-3p	ASH1L
hsa-miR-143-3p	TMOD2
hsa-miR-143-3p	C1orf74
hsa-miR-143-3p	TMEM121
hsa-miR-143-3p	ATP11C
hsa-miR-143-3p	JAKMIP2
hsa-miR-143-3p	LARP1
hsa-miR-143-3p	PTBP3
hsa-miR-143-3p	USP46
hsa-miR-143-3p	KLF12
hsa-miR-143-3p	UBE2E1
hsa-miR-143-3p	TAPBP
hsa-miR-143-3p	TXLNB
hsa-miR-143-3p	POLH
hsa-miR-143-3p	PCMT1
hsa-miR-143-3p	ANKRD12
hsa-miR-143-3p	MAF
hsa-miR-143-3p	FAM168A
hsa-miR-143-3p	ZC4H2
hsa-miR-143-3p	ZNF570
hsa-miR-143-3p	PDPR
hsa-miR-143-3p	TNS3
hsa-miR-143-3p	PHTF2
hsa-miR-143-3p	TRPS1
hsa-miR-143-3p	QKI
hsa-miR-143-3p	MLLT3
hsa-miR-143-3p	DLG3
hsa-miR-143-3p	BMPR1A
hsa-miR-143-3p	CREBZF
hsa-miR-143-3p	AMOTL1
hsa-miR-143-3p	TPM3
hsa-miR-143-3p	EBF1
hsa-miR-143-3p	MBOAT2
hsa-miR-143-3p	ZNF275
hsa-miR-143-3p	ZNF618
hsa-miR-143-3p	OTUD4
hsa-miR-143-3p	PAG1
hsa-miR-143-3p	LRRC8B
hsa-miR-143-3p	UPF2
hsa-miR-143-3p	TANC2
hsa-miR-143-3p	REEP3
hsa-miR-143-3p	TET2
hsa-miR-143-3p	SLC35F1
hsa-miR-143-3p	RMND5A
hsa-miR-143-3p	MAPK1
hsa-miR-143-3p	HECTD1
hsa-miR-143-3p	PTPRT
hsa-miR-143-3p	KCNC1
hsa-miR-143-3p	SAMD8
hsa-miR-143-3p	NFIC
hsa-miR-143-3p	ERCC6
hsa-miR-143-3p	CSNK1G3
hsa-miR-143-3p	NFATC2
hsa-miR-143-3p	CORO2B
hsa-miR-143-3p	NCOA7
hsa-miR-143-3p	CDK1
hsa-miR-143-3p	KCMF1
hsa-miR-143-3p	PLAGL2
hsa-miR-145-3p	DDX6
hsa-miR-145-3p	AHCYL2
hsa-miR-145-3p	CDK17
hsa-miR-145-3p	EBF1
hsa-miR-145-3p	SERPINA1
hsa-miR-145-3p	GGCX
hsa-miR-145-3p	HBP1
hsa-miR-145-3p	TSPAN12
hsa-miR-145-3p	CREB1
hsa-miR-145-3p	SLC24A2
hsa-miR-145-3p	YES1
hsa-miR-145-3p	CREB5
hsa-miR-145-3p	KLHL3
hsa-miR-145-3p	DGKH
hsa-miR-145-3p	DLX3
hsa-miR-145-3p	NTNG1
hsa-miR-145-3p	UBR3
hsa-miR-145-3p	KHDRBS1
hsa-miR-145-3p	PDZK1
hsa-miR-145-3p	CELF2
hsa-miR-145-3p	ZNF687
hsa-miR-145-3p	THOC2
hsa-miR-145-3p	SMG7
hsa-miR-145-3p	ZFYVE1
hsa-miR-145-3p	KCND2
hsa-miR-145-5p	ABHD17C
hsa-miR-145-5p	SRGAP1
hsa-miR-145-5p	CLCN3
hsa-miR-145-5p	MBTD1
hsa-miR-145-5p	ABCE1
hsa-miR-145-5p	TRIM2
hsa-miR-145-5p	PPP3CA
hsa-miR-145-5p	CAMSAP2
hsa-miR-145-5p	SMAD3
hsa-miR-145-5p	PLCE1
hsa-miR-145-5p	CACHD1
hsa-miR-145-5p	HIC2
hsa-miR-145-5p	DNAL1
hsa-miR-145-5p	UBA6
hsa-miR-145-5p	CACNA1D
hsa-miR-145-5p	SMAD5
hsa-miR-145-5p	GABARAPL1
hsa-miR-145-5p	ERLIN1
hsa-miR-145-5p	HNRNPH2
hsa-miR-145-5p	CAMK1D
hsa-miR-145-5p	DENND5B
hsa-miR-145-5p	ANGPT2
hsa-miR-145-5p	EBF1
hsa-miR-145-5p	ARHGAP6
hsa-miR-145-5p	RTKN
hsa-miR-145-5p	PRKD3
hsa-miR-145-5p	PLCL2
hsa-miR-145-5p	EPB41L5
hsa-miR-145-5p	YES1
hsa-miR-145-5p	SENP2
hsa-miR-145-5p	MAGI2
hsa-miR-145-5p	POTEM
hsa-miR-145-5p	TBC1D15
hsa-miR-145-5p	NSUN4
hsa-miR-145-5p	ST6GALNAC3
hsa-miR-145-5p	GRB10
hsa-miR-145-5p	CAMK2D
hsa-miR-145-5p	UBN2
hsa-miR-145-5p	EXOC8
hsa-miR-145-5p	TMEM167A
hsa-miR-145-5p	FLNB
hsa-miR-145-5p	ACTB
hsa-miR-145-5p	RBM20
hsa-miR-145-5p	TAOK1
hsa-miR-145-5p	CTNNBIP1
hsa-miR-145-5p	CDC37L1
hsa-miR-145-5p	MAP3K1
hsa-miR-145-5p	SKP1
hsa-miR-145-5p	PODXL
hsa-miR-145-5p	OS9
hsa-miR-145-5p	SLC25A25
hsa-miR-145-5p	ZNF704
hsa-miR-145-5p	CABP1
hsa-miR-145-5p	TBC1D14
hsa-miR-145-5p	NEDD4L
hsa-miR-145-5p	SLC38A2
hsa-miR-145-5p	GPBP1
hsa-miR-145-5p	BRWD3
hsa-miR-145-5p	MAPK4
hsa-miR-145-5p	CCDC107
hsa-miR-145-5p	PPP1R9A
hsa-miR-145-5p	NAA25
hsa-miR-145-5p	TBPL1
hsa-miR-145-5p	CLMN
hsa-miR-145-5p	RBPMS
hsa-miR-145-5p	RASSF5
hsa-miR-145-5p	MMP16
hsa-miR-145-5p	MPZL1
